# Supplementary material for: Cycloalkenyl nonaflates as electrophilic cross-coupling substrates for palladium catalyzed C–N bond forming reactions with enolizable heterocycles under microwave enhanced conditions
Source: Royal Society of Chemistry journal article supplement (doi:10.1039/c3nj01355c), 2013-11-30

## New Journal of Chemistry

### Cycloalkenyl nonaflates as electrophilic cross-coupling substrates for palladium catalyzed C-N bond forming reactions with enolizable heterocycles under microwave enhanced conditions

K. K. Abdul Khader<sup>a</sup>, Ayyiliath. M. Sajith<sup>b,c\*</sup>, M. Syed Ali Padusha<sup>a\*</sup>, H. P. Nagaswarupa<sup>d</sup>, A. Muralidharan<sup>b,c</sup>

#### Table of contents

|     |                                                                                                |    |
|-----|------------------------------------------------------------------------------------------------|----|
| 1.  | 1H NMR spectra of 3-oxocyclopent-1-enyl trifluoromethanesulfonate.....                         | 5  |
| 2.  | 13 C NMR Spectra of 3-oxocyclopent-1-enyl trifluoromethanesulfonate .....                      | 6  |
| 3.  | 19 F NMR Spectra of 3-oxocyclopent-1-enyl trifluoromethanesulfonate.....                       | 7  |
| 4.  | 1H NMR Spectra of 3-oxocyclopent-1-enyl 1,1,2,2,3,3,4,4,4-nonafluorobutane-1-sulfonate.....    | 8  |
| 5.  | 13 C NMR Spectra of 3-oxocyclopent-1-enyl 1,1,2,2,3,3,4,4,4-nonafluorobutane-1-sulfonate.....  | 9  |
| 6.  | 19 F NMR Spectra of 3-oxocyclopent-1-enyl 1,1,2,2,3,3,4,4,4-nonafluorobutane-1-sulfonate ..... | 10 |
| 7.  | 1 H NMR Spectra of 3-oxocyclohex-1-enyl 1,1,2,2,3,3,4,4,4-nonafluorobutane-1-sulfonate.....    | 11 |
| 8.  | 13 C NMR Spectra of 3-oxocyclohex-1-enyl 1,1,2,2,3,3,4,4,4-nonafluorobutane-1-sulfonate .....  | 12 |
| 9.  | 1 H NMR spectra of 5-methyl-1-(3-oxocyclopent-1-enyl) pyridin-2 (1 H)-one, 5a.....             | 13 |
| 10. | 13 C NMR spectra of 5-methyl-1-(3-oxocyclopent-1-enyl) pyridin-2 (1 H)-one, 5a.....            | 14 |
| 11. | IR spectra of 5-methyl-1-(3-oxocyclopent-1-enyl) pyridin-2 (1 H)-one, 5a .....                 | 15 |
| 12. | LCMS spectra of 5-methyl-1-(3-oxocyclopent-1-enyl) pyridin-2 (1 H)-one, 5a .....               | 16 |
| 13. | 1 H NMR spectra of 4-methyl-3-nitro-1-(3-oxocyclopent-1-enyl) pyridin-2 (1 H)-one, 5b.....     | 17 |
| 14. | 13 C NMR spectra of 4-methyl-3-nitro-1-(3-oxocyclopent-1-enyl) pyridin-2 (1 H)-one, 5b .....   | 18 |

## New Journal of Chemistry

|     |                                                                                                |    |
|-----|------------------------------------------------------------------------------------------------|----|
| 15. | IR spectra of 4-methyl-3-nitro-1-(3-oxocyclopent-1-enyl) pyridin-2 (1 H)-one, 5b.....          | 19 |
| 16. | LCMS spectra of 4-methyl-3-nitro-1-(3-oxocyclopent-1-enyl) pyridin-2 (1 H)-one, 5b.....        | 20 |
| 17. | 1 H NMR Spectra of 1-(3-oxocyclopent-1-enyl) pyridin-2 (1 H)-one, 5c.....                      | 21 |
| 18. | 13 C NMR Spectra of 1-(3-oxocyclopent-1-enyl) pyridin-2 (1 H)-one, 5c.....                     | 22 |
| 19. | IR Spectra of 1-(3-oxocyclopent-1-enyl) pyridin-2 (1 H)-one, 5c.....                           | 23 |
| 20. | LCMS Spectra of 1-(3-oxocyclopent-1-enyl) pyridin-2 (1 H)-one, 5c.....                         | 24 |
| 21. | 1 H NMR Spectra of 3-methyl-1-(3-oxocyclopent-1-enyl) pyridin-2 (1 H)-one, 5d.....             | 25 |
| 22. | 13 C NMR Spectra of 3-methyl-1-(3-oxocyclopent-1-enyl) pyridin-2 (1 H)-one, 5d.....            | 26 |
| 23. | LCMS Spectra of 3-methyl-1-(3-oxocyclopent-1-enyl) pyridin-2 (1 H)-one, 5d.....                | 27 |
| 24. | 1 H NMR Spectra of 4-methyl-1-(3-oxocyclopent-1-enyl) pyridin-2 (1 H)-one, 5e.....             | 28 |
| 25. | 13 C NMR Spectra of 4-methyl-1-(3-oxocyclopent-1-enyl) pyridin-2 (1 H)-one, 5e.....            | 29 |
| 26. | IR Spectra of 4-methyl-1-(3-oxocyclopent-1-enyl) pyridin-2 (1 H)-one, 5e.....                  | 30 |
| 27. | LCMS Spectra of 4-methyl-1-(3-oxocyclopent-1-enyl) pyridin-2 (1 H)-one, 5e.....                | 31 |
| 28. | 1 H NMR Spectra of 5-nitro-1-(3-oxocyclopent-1-enyl) pyridin-2 (1 H)-one, 5f.....              | 32 |
| 29. | 13 CNMR Spectra of 5-nitro-1-(3-oxocyclopent-1-enyl) pyridin-2 (1 H)-one, 5f.....              | 33 |
| 30. | IR Spectra of 5-nitro-1-(3-oxocyclopent-1-enyl) pyridin-2 (1 H)-one, 5f.....                   | 34 |
| 31. | 1 H NMR Spectra of 1, 3-bis (3-oxocyclopent-1-enyl)-1 H-benzo[d]imidazol-2 (3 H)-one, 5i.....  | 35 |
| 32. | 13 C NMR Spectra of 1, 3-bis (3-oxocyclopent-1-enyl)-1 H-benzo[d]imidazol-2 (3 H)-one, 5i..... | 36 |
| 33. | IR Spectra of 1, 3-bis (3-oxocyclopent-1-enyl)-1 H-benzo[d]imidazol-2 (3 H)-one, 5i.....       | 37 |
| 34. | LCMS Spectra of 1, 3-bis (3-oxocyclopent-1-enyl)-1 H-benzo[d]imidazol-2 (3 H)-one, 5i.....     | 38 |
| 35. | 1 H NMR Spectra of 3-chloro-7-(3-oxocyclopent-1-enyl)-1, 7-naphthyridin-8 (7 H)-one, 5k.....   | 39 |
| 36. | 13 C NMR Spectra of 3-chloro-7-(3-oxocyclopent-1-enyl)-1, 7-naphthyridin-8 (7 H)-one, 5k.....  | 40 |

## New Journal of Chemistry

|     |                                                                                                |    |
|-----|------------------------------------------------------------------------------------------------|----|
| 37. | IR Spectra of 3-chloro-7-(3-oxocyclopent-1-enyl)-1, 7-naphthyridin-8 (7 H)-one, 5k.....        | 41 |
| 38. | LCMS Spectra of 3-chloro-7-(3-oxocyclopent-1-enyl)-1, 7-naphthyridin-8 (7 H)-one, 5k.....      | 42 |
| 39. | 1 H NMR Spectra of 1-(3-oxocyclohex-1-enyl) pyridin-2 (1 H)-one, 5m .....                      | 43 |
| 40. | 13 C NMR Spectra of 1-(3-oxocyclohex-1-enyl) pyridin-2 (1 H)-one, 5m .....                     | 44 |
| 41. | IR Spectra of 1-(3-oxocyclohex-1-enyl) pyridin-2 (1 H)-one, 5m .....                           | 45 |
| 42. | LCMS Spectra of 1-(3-oxocyclohex-1-enyl) pyridin-2 (1 H)-one, 5m .....                         | 46 |
| 43. | 1 H NMR Spectra of 5-methyl-1-(3-oxocyclohex-1-enyl) pyridin-2 (1 H)-one, 5o.....              | 47 |
| 44. | 13 C NMR Spectra of 5-methyl-1-(3-oxocyclohex-1-enyl) pyridin-2 (1 H)-one, 5o.....             | 48 |
| 45. | LCMS Spectra of 5-methyl-1-(3-oxocyclohex-1-enyl) pyridin-2 (1 H)-one, 5o.....                 | 49 |
| 46. | 1 H NMR Spectra of 4-(trifluoromethyl)-1-(3-oxocyclohex-1-enyl) pyridin-2 (1 H)-one, 5p.....   | 50 |
| 47. | LCMS Spectra of 4-(trifluoromethyl)-1-(3-oxocyclohex-1-enyl) pyridin-2 (1 H)-one, 5p.....      | 51 |
| 48. | 1 H NMR Spectra of 1-(3-oxocyclohex-1-enyl)-1 H-benzo[d]imidazol-2 (3 H)-one, 5q .....         | 52 |
| 49. | LCMS Spectra of 1-(3-oxocyclohex-1-enyl)-1 H-benzo[d]imidazol-2 (3 H)-one, 5q .....            | 53 |
| 50. | IR Spectra of 1-(3-oxocyclohex-1-enyl)-1 H-benzo[d]imidazol-2 (3 H)-one, 5q .....              | 54 |
| 51. | 1 H NMR Spectra of 3-methoxy-7- (3-oxocyclohex-1-enyl)-1, 7-naphthyridin-8 (7 H)-one, 5s.....  | 55 |
| 52. | 13 C NMR Spectra of 3-methoxy-7- (3-oxocyclohex-1-enyl)-1, 7-naphthyridin-8 (7 H)-one, 5s..... | 56 |
| 53. | IR Spectra of 3-methoxy-7- (3-oxocyclohex-1-enyl)-1, 7-naphthyridin-8 (7 H)-one, 5s.....       | 57 |
| 54. | LCMS Spectra of 3-methoxy-7- (3-oxocyclohex-1-enyl)-1, 7-naphthyridin-8 (7 H)-one, 5s.....     | 58 |
| 55. | 1 H NMR Spectra of 1-(5,5-dimethyl-3-oxocyclohex-1-enyl)pyridin-2(1H)-one, 5t .....            | 59 |
| 56. | 13 C NMR Spectra of 1-(5,5-dimethyl-3-oxocyclohex-1-enyl)pyridin-2(1H)-one, 5t.....            | 60 |
| 57. | LCMS Spectra of 1-(5,5-dimethyl-3-oxocyclohex-1-enyl)pyridin-2(1H)-one, 5t .....               | 61 |
| 58. | LCMS Spectra of 1-(3-oxo-5-phenylcyclohex-1-enyl)pyridin-2(1H)-one, 5u.....                    | 62 |

## New Journal of Chemistry

|     |                                                                                       |    |
|-----|---------------------------------------------------------------------------------------|----|
| 59. | LCMS Spectra of 1-(5-(4-chlorophenyl)-3-oxocyclohex-1-enyl)pyridin-2(1H)-one, 5v..... | 63 |
|-----|---------------------------------------------------------------------------------------|----|

## New Journal of Chemistry

### 1. $^1\text{H}$ NMR spectra of 3-oxocyclopent-1-enyl trifluoromethanesulfonate

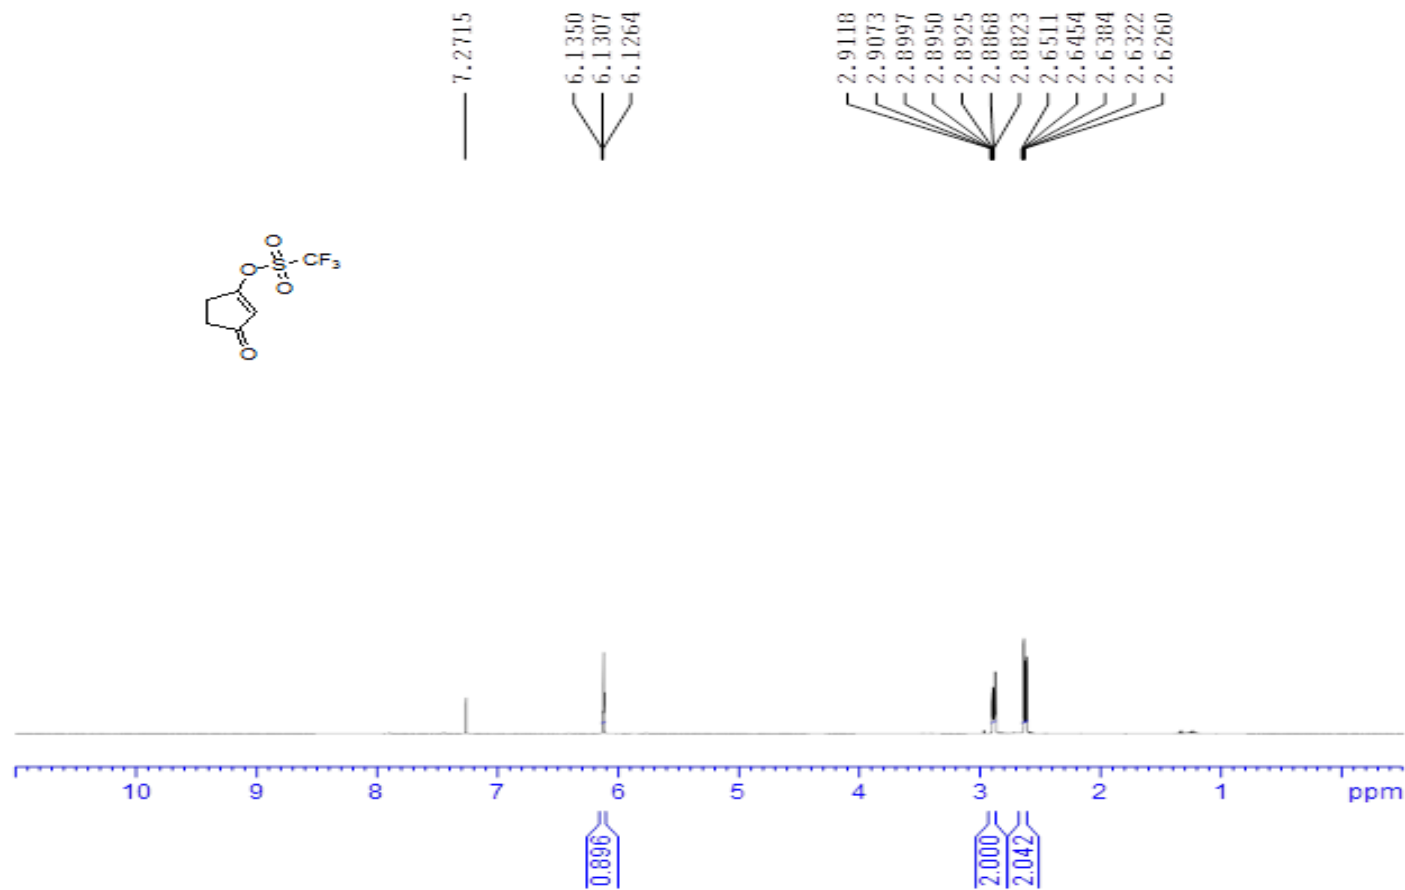

## New Journal of Chemistry

### 2. <sup>13</sup>C NMR Spectra of 3-oxocyclopent-1-enyl trifluoromethanesulfonate

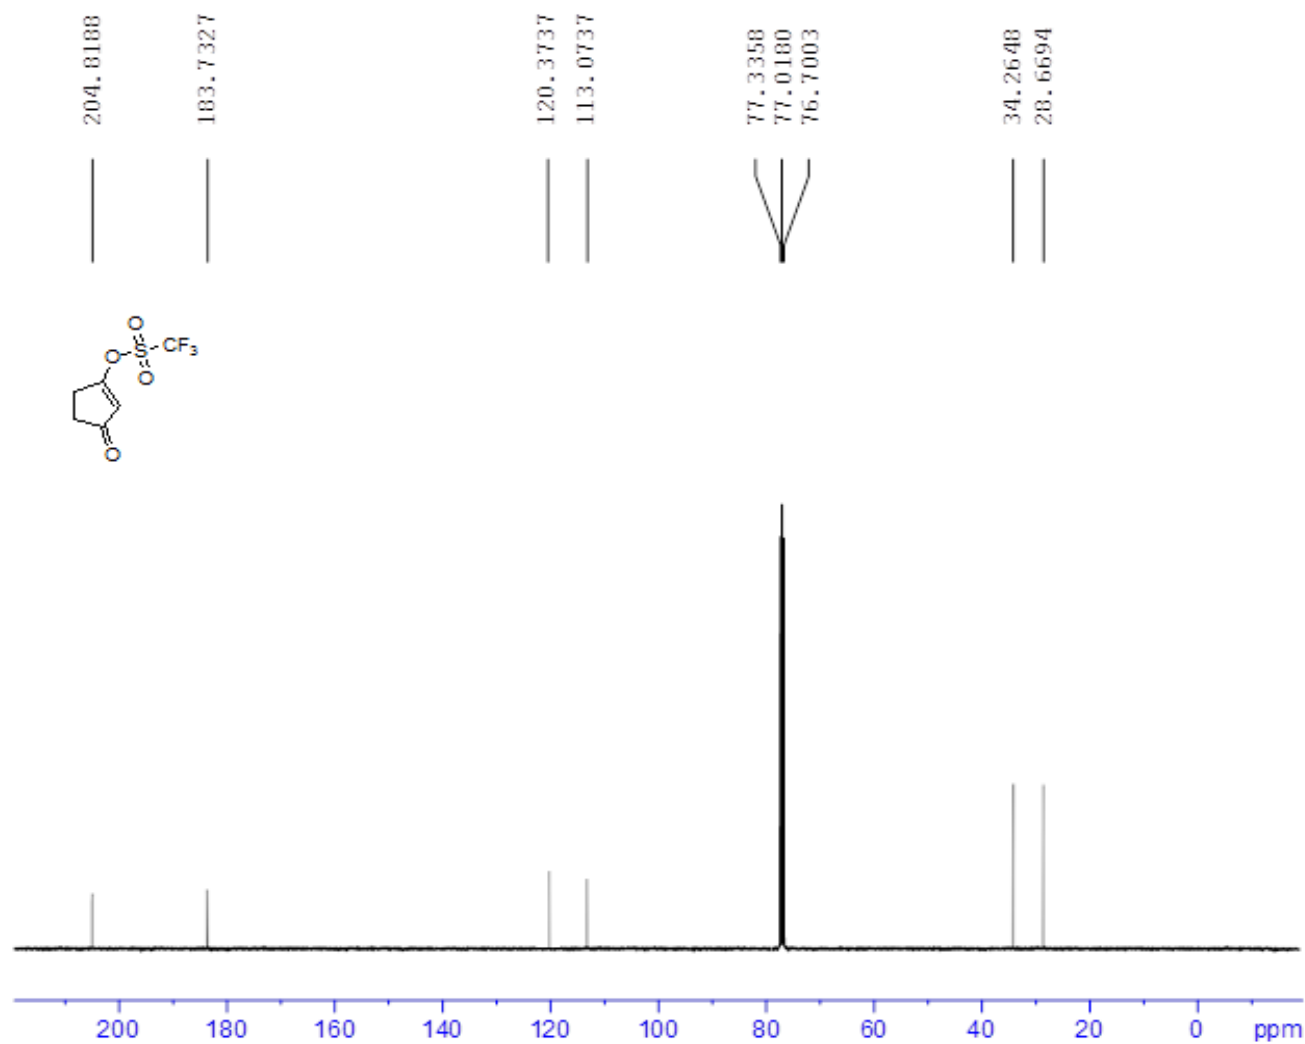

## New Journal of Chemistry

### 3. $^{19}\text{F}$ NMR Spectra of 3-oxocyclopent-1-enyl trifluoromethanesulfonate

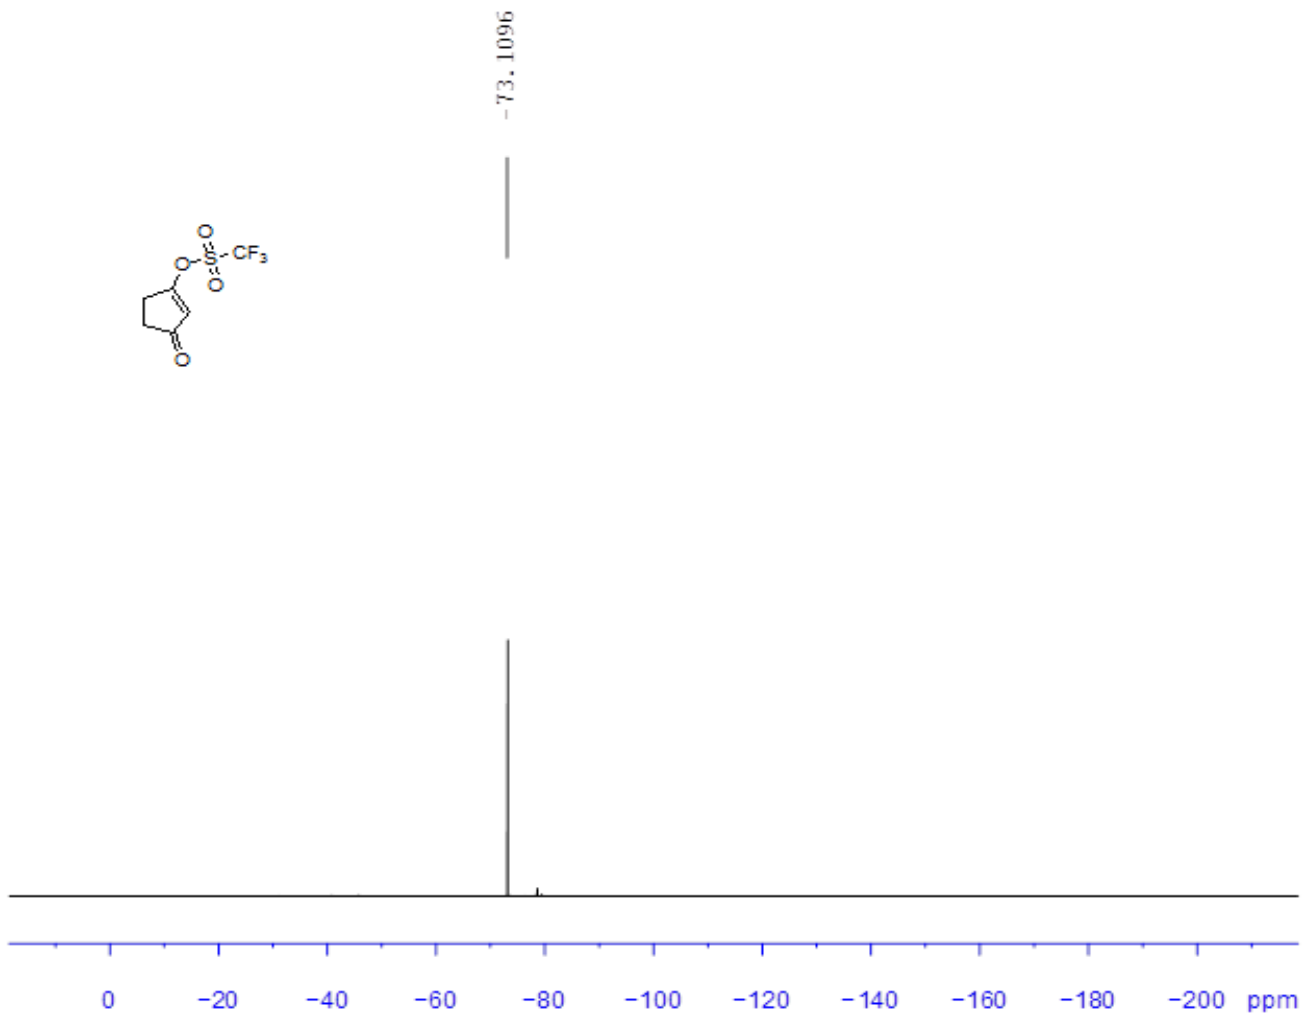

## New Journal of Chemistry

### 4. <sup>1</sup>H NMR Spectra of 3-oxocyclopent-1-enyl 1,1,2,2,3,3,4,4,4-nonafluorobutane-1-sulfonate

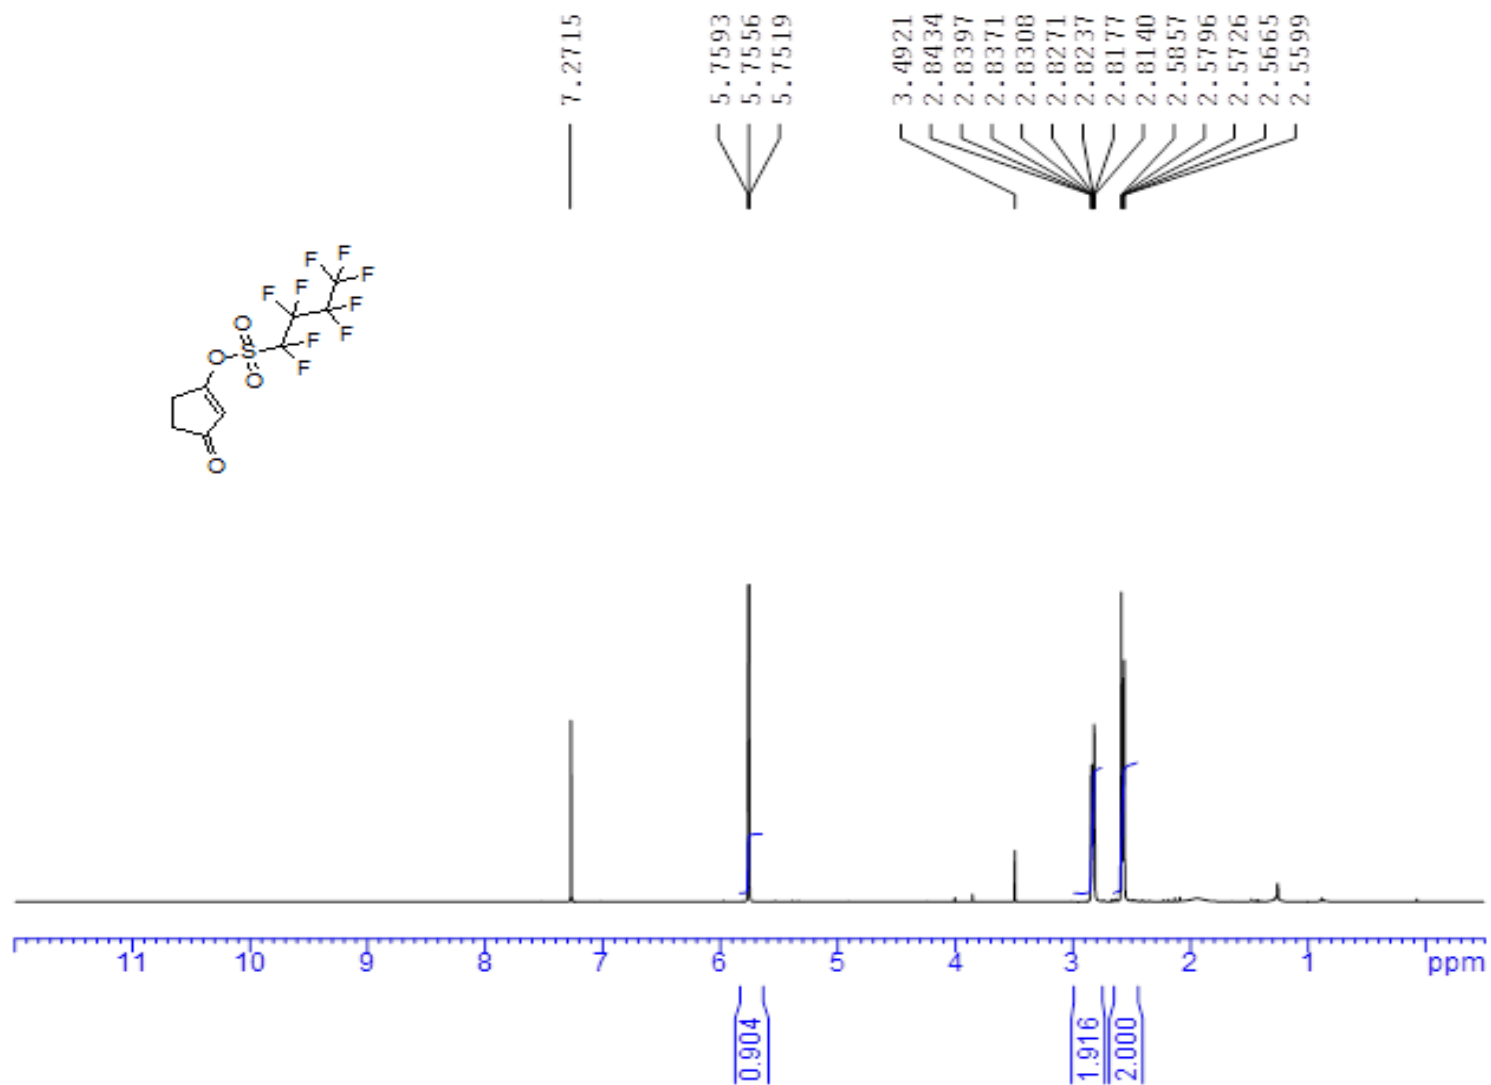



## New Journal of Chemistry

### 5. <sup>13</sup>C NMR Spectra of 3-oxocyclopent-1-enyl 1,1,2,2,3,3,4,4,4-nonafluorobutane-1-sulfonate

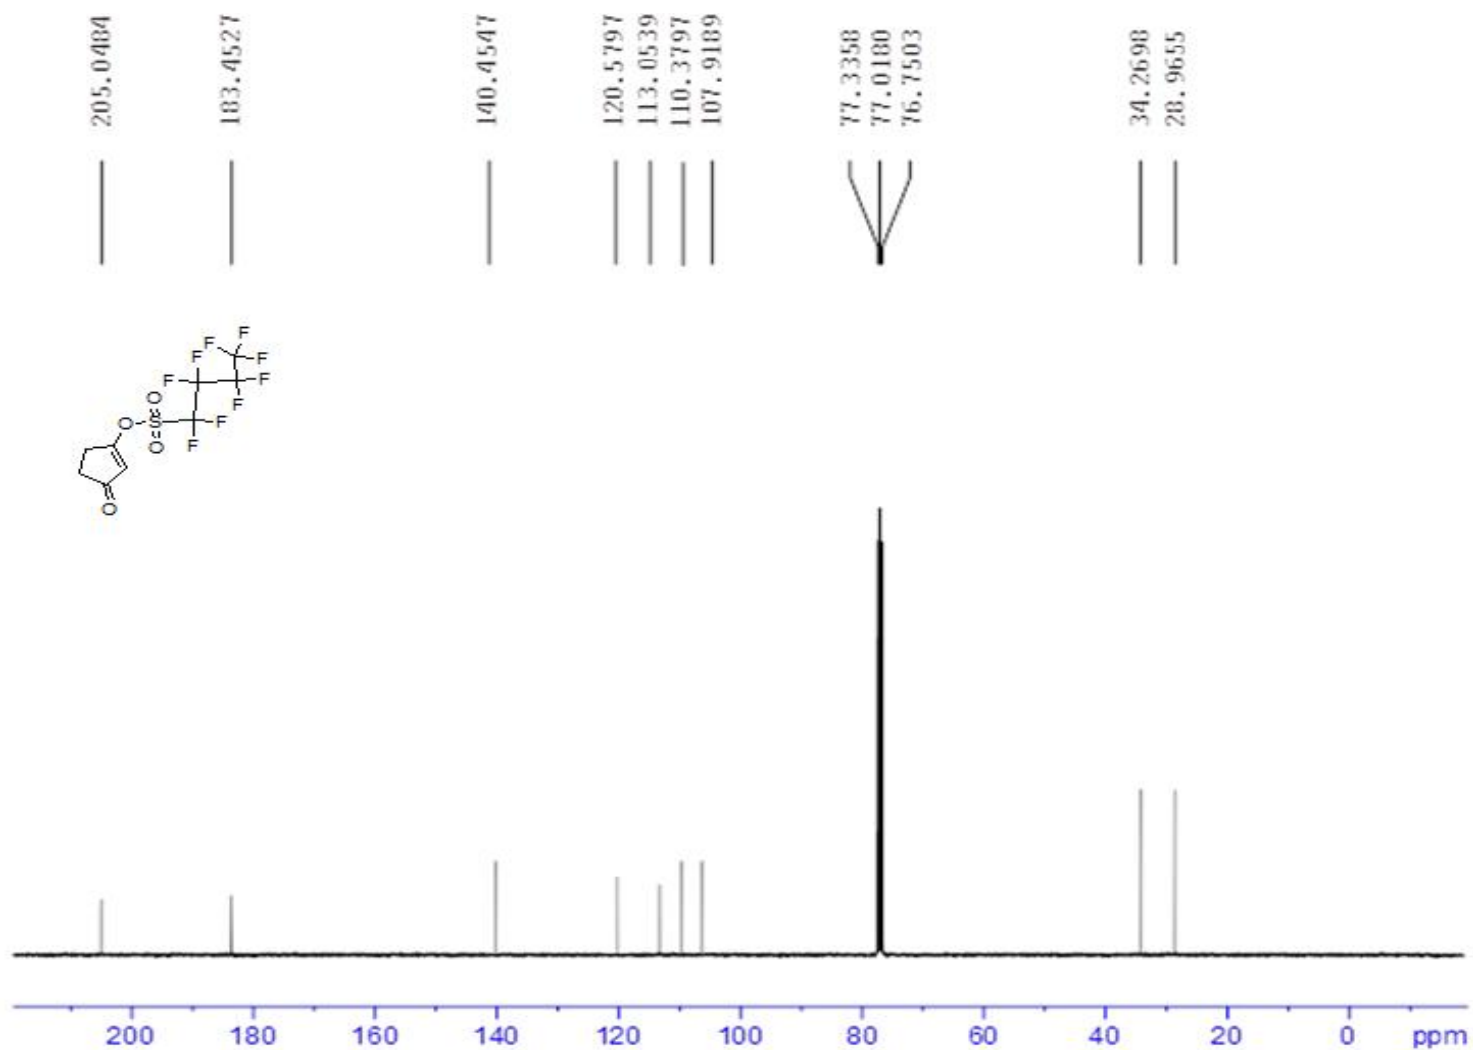

## New Journal of Chemistry

### 6. $^{19}\text{F}$ NMR Spectra of 3-oxocyclopent-1-enyl 1,1,2,2,3,3,4,4,4-nonafluorobutane-1-sulfonate

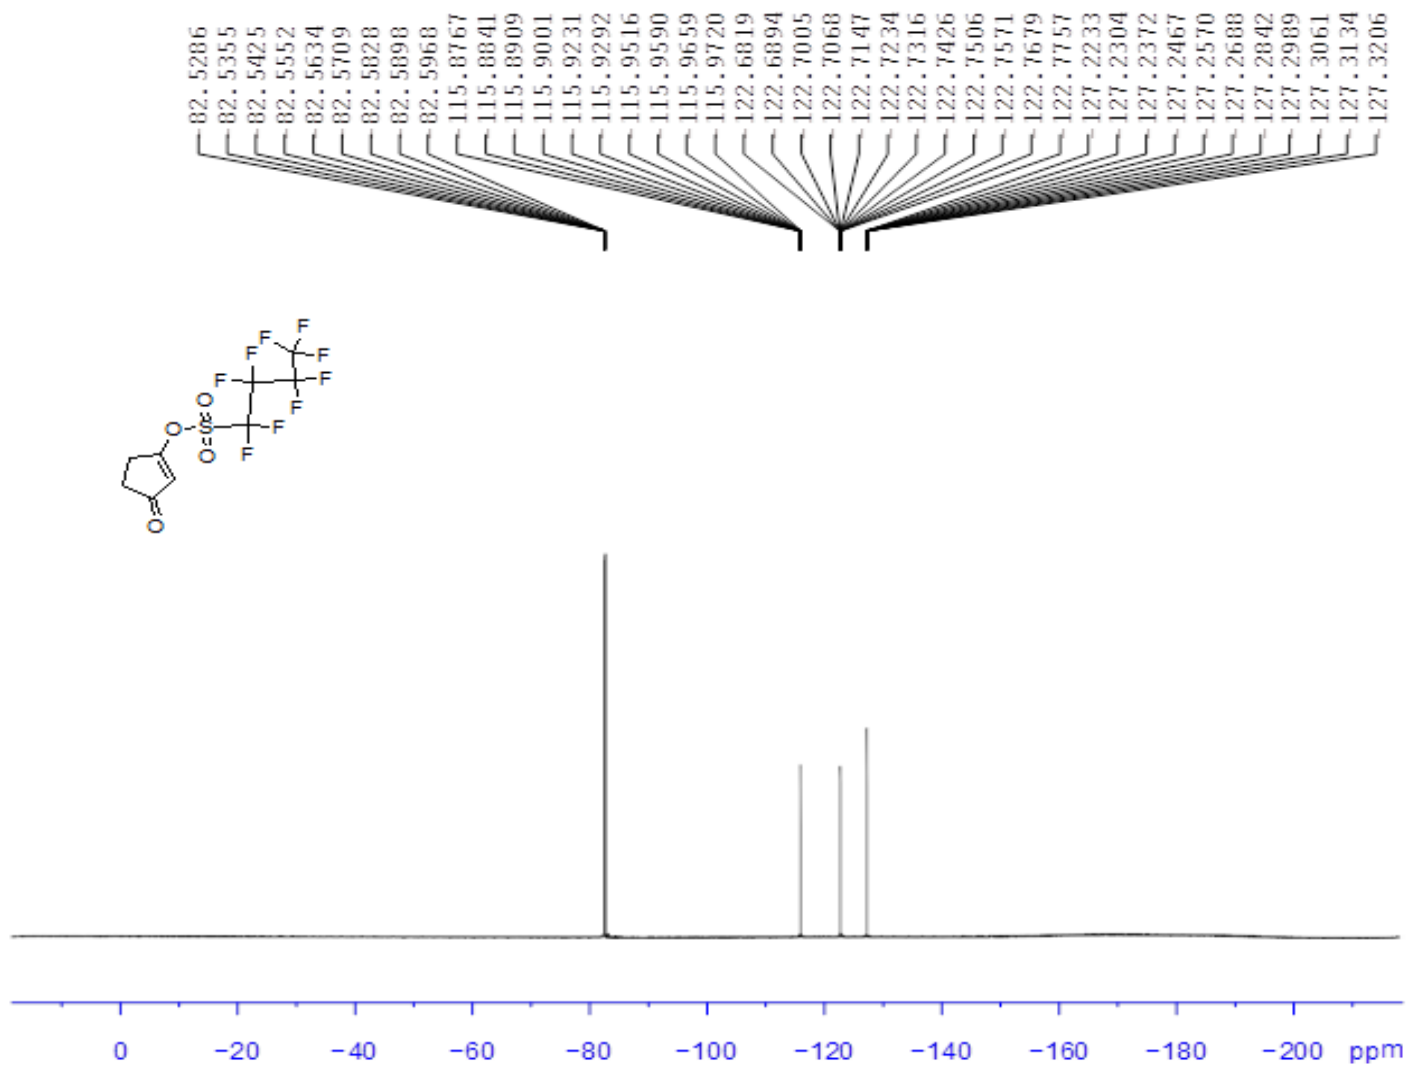

## New Journal of Chemistry

### 7. $^1\text{H}$ NMR Spectra of 3-oxocyclohex-1-enyl 1,1,2,2,3,3,4,4,4-nonafluorobutane-1-sulfonate

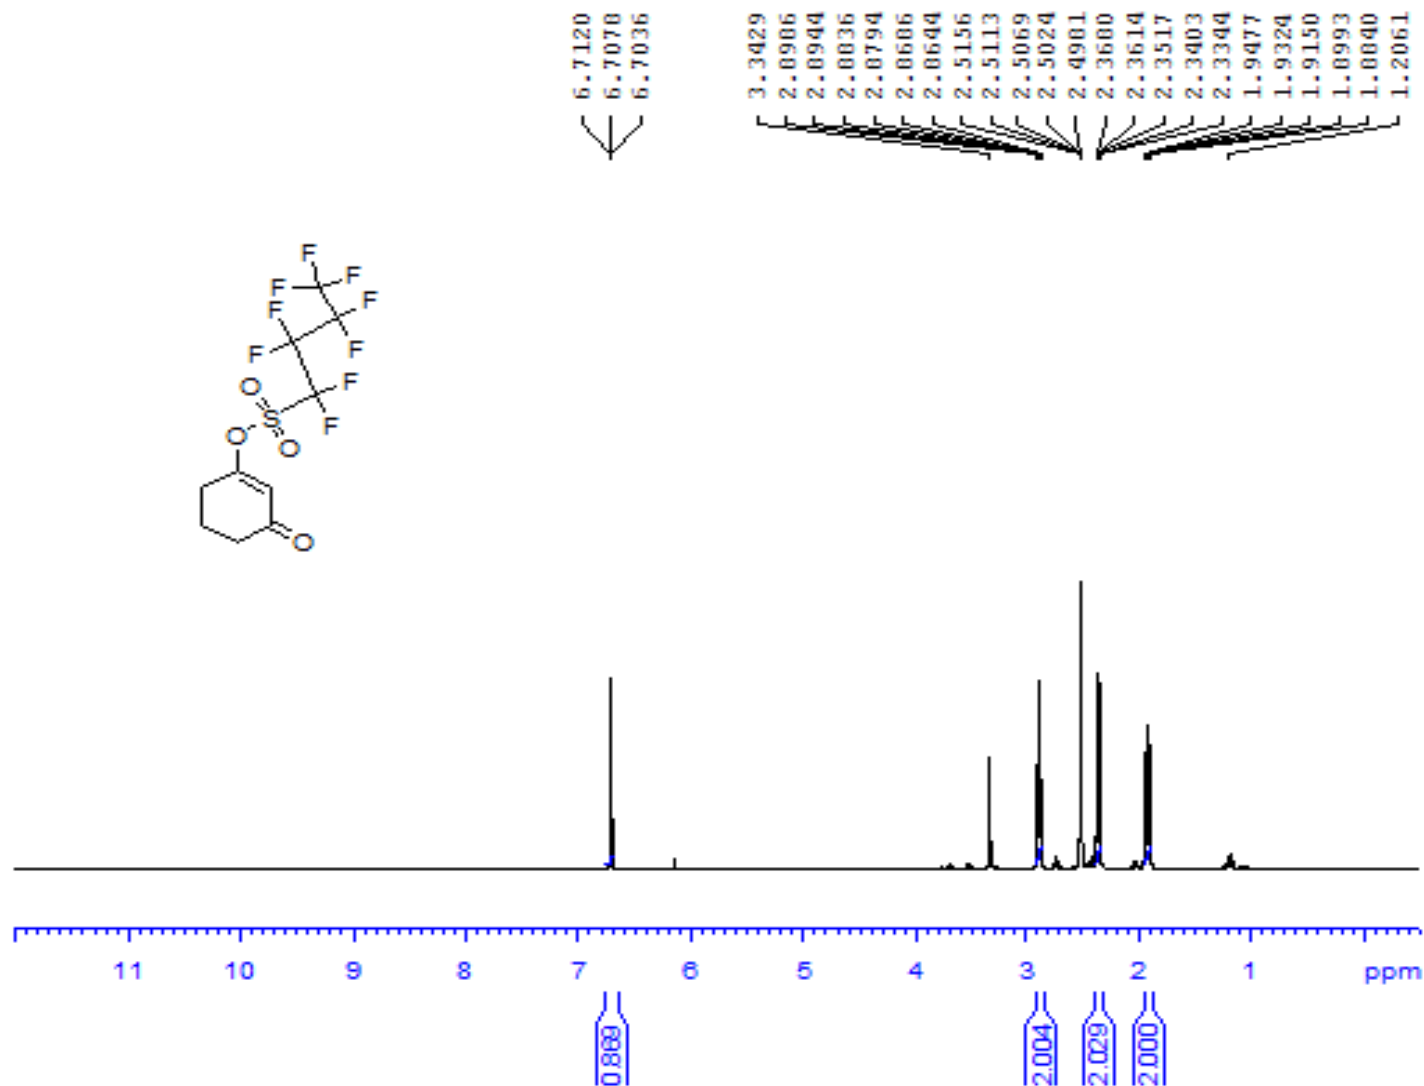

## New Journal of Chemistry

### 8. <sup>13</sup>C NMR Spectra of 3-oxocyclohex-1-enyl 1,1,2,2,3,3,4,4,4-nonafluorobutane-1-sulfonate

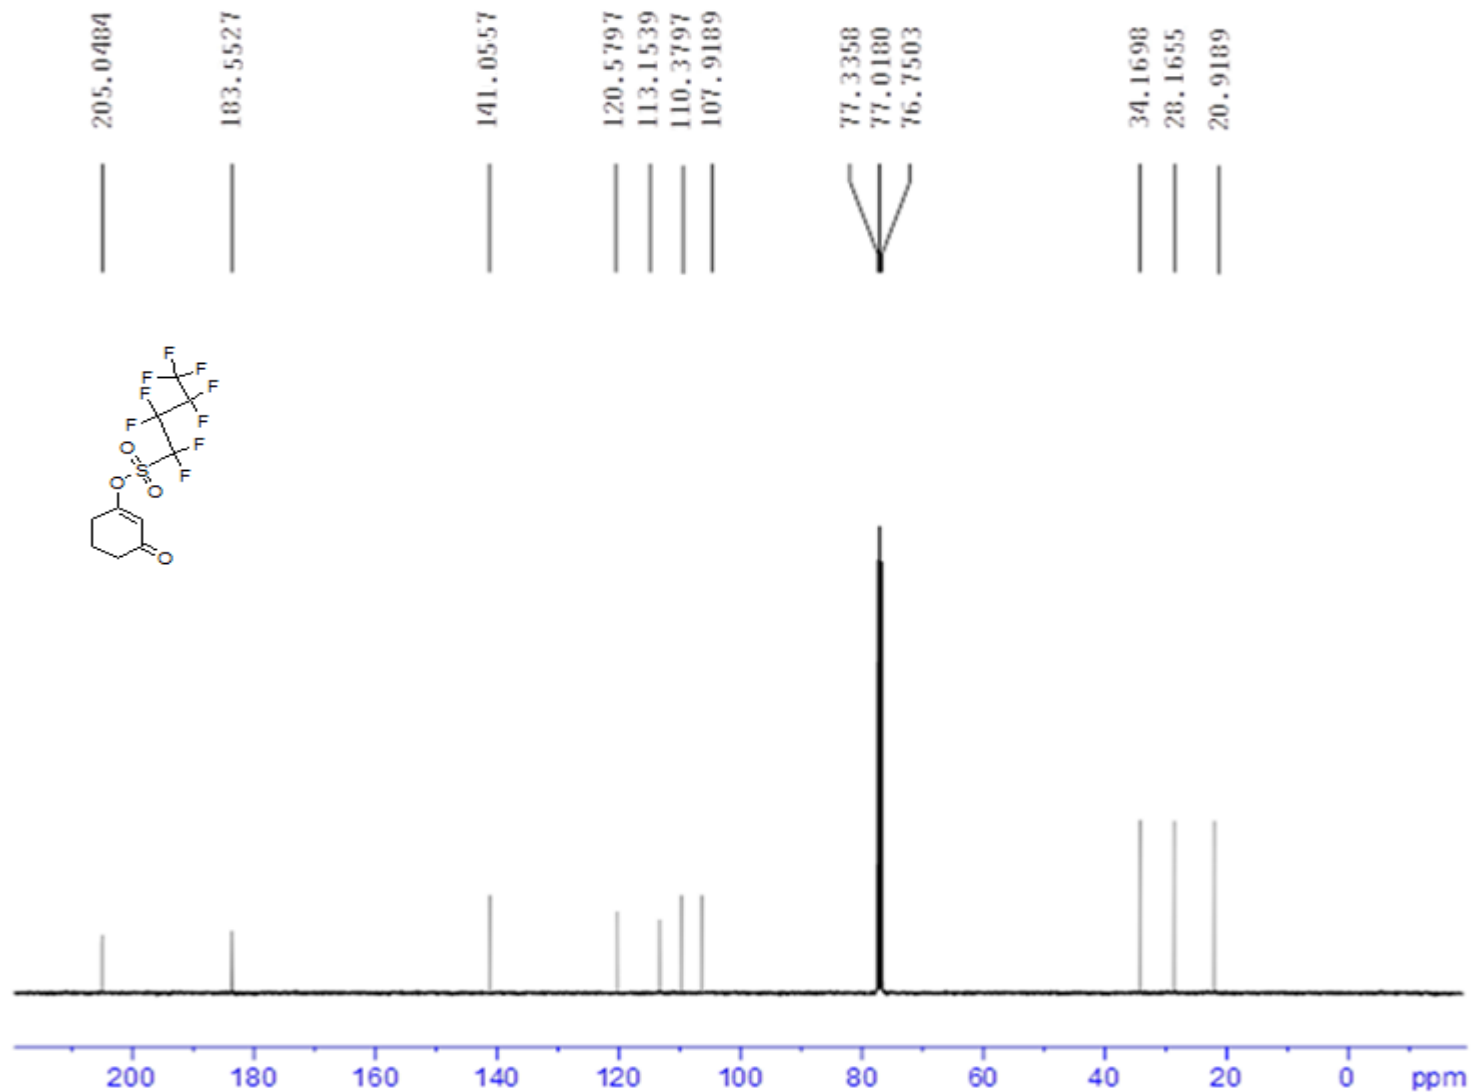

## New Journal of Chemistry

### 9. <sup>1</sup>H NMR spectra of 5-methyl-1-(3-oxocyclopent-1-enyl) pyridin-2 (1 H)-one, 5a

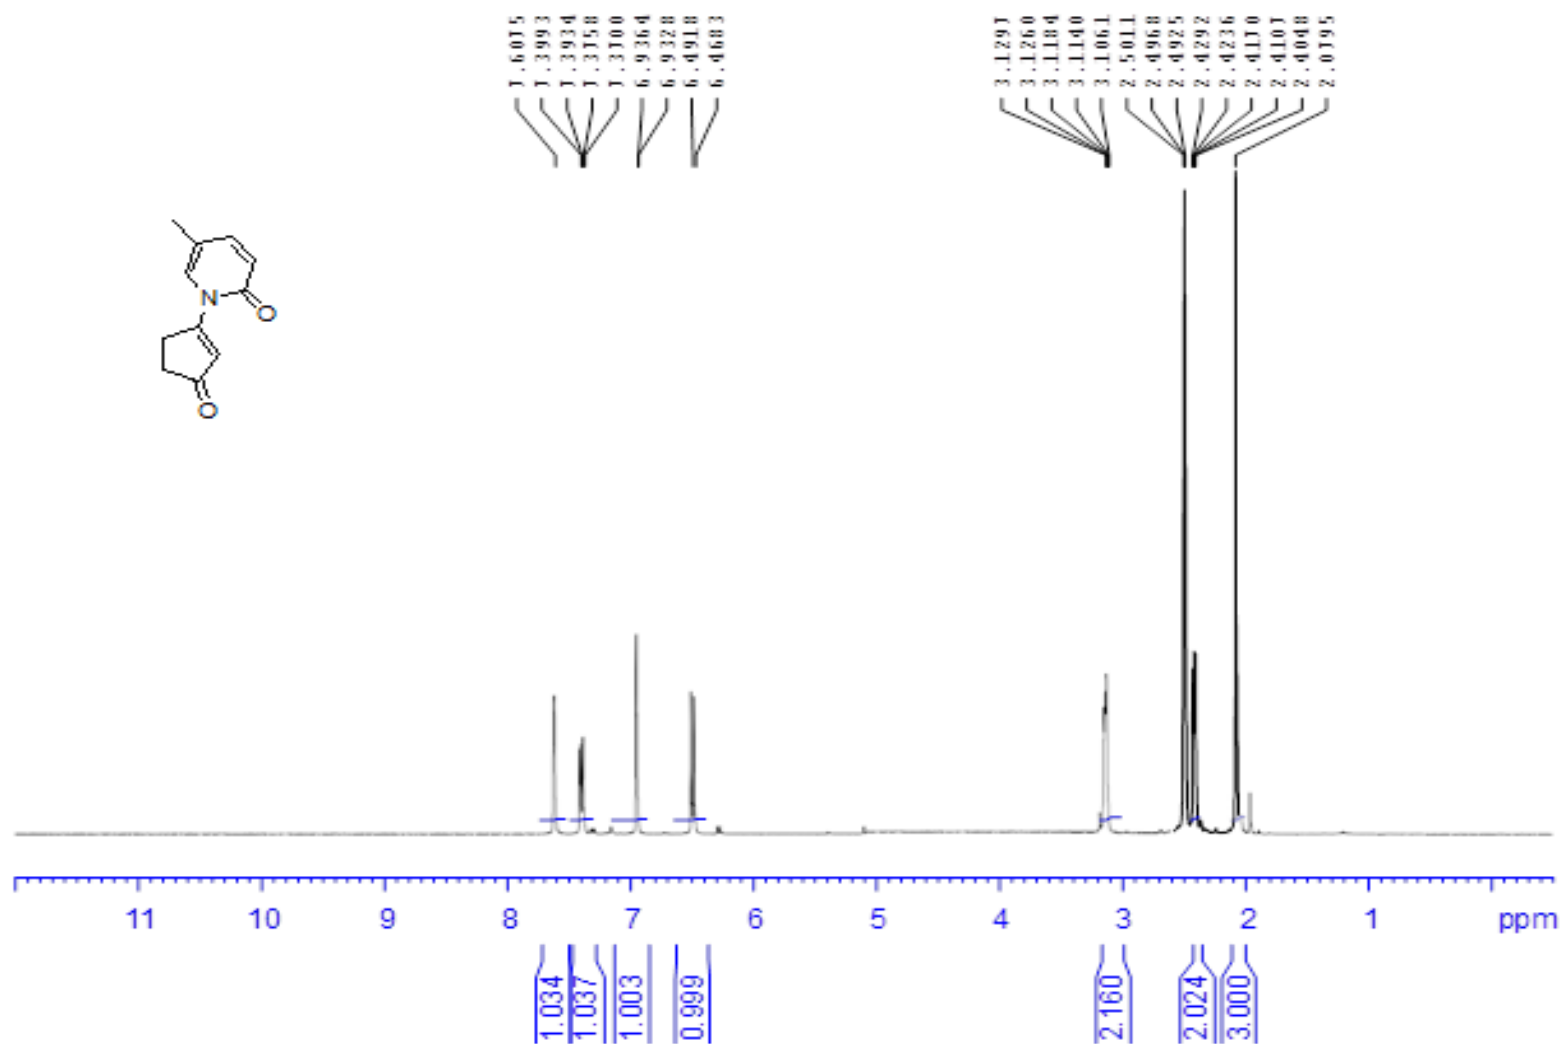

## New Journal of Chemistry

### 10. <sup>13</sup>C NMR spectra of 5-methyl-1-(3-oxocyclopent-1-enyl) pyridin-2 (1 H)-one, 5a

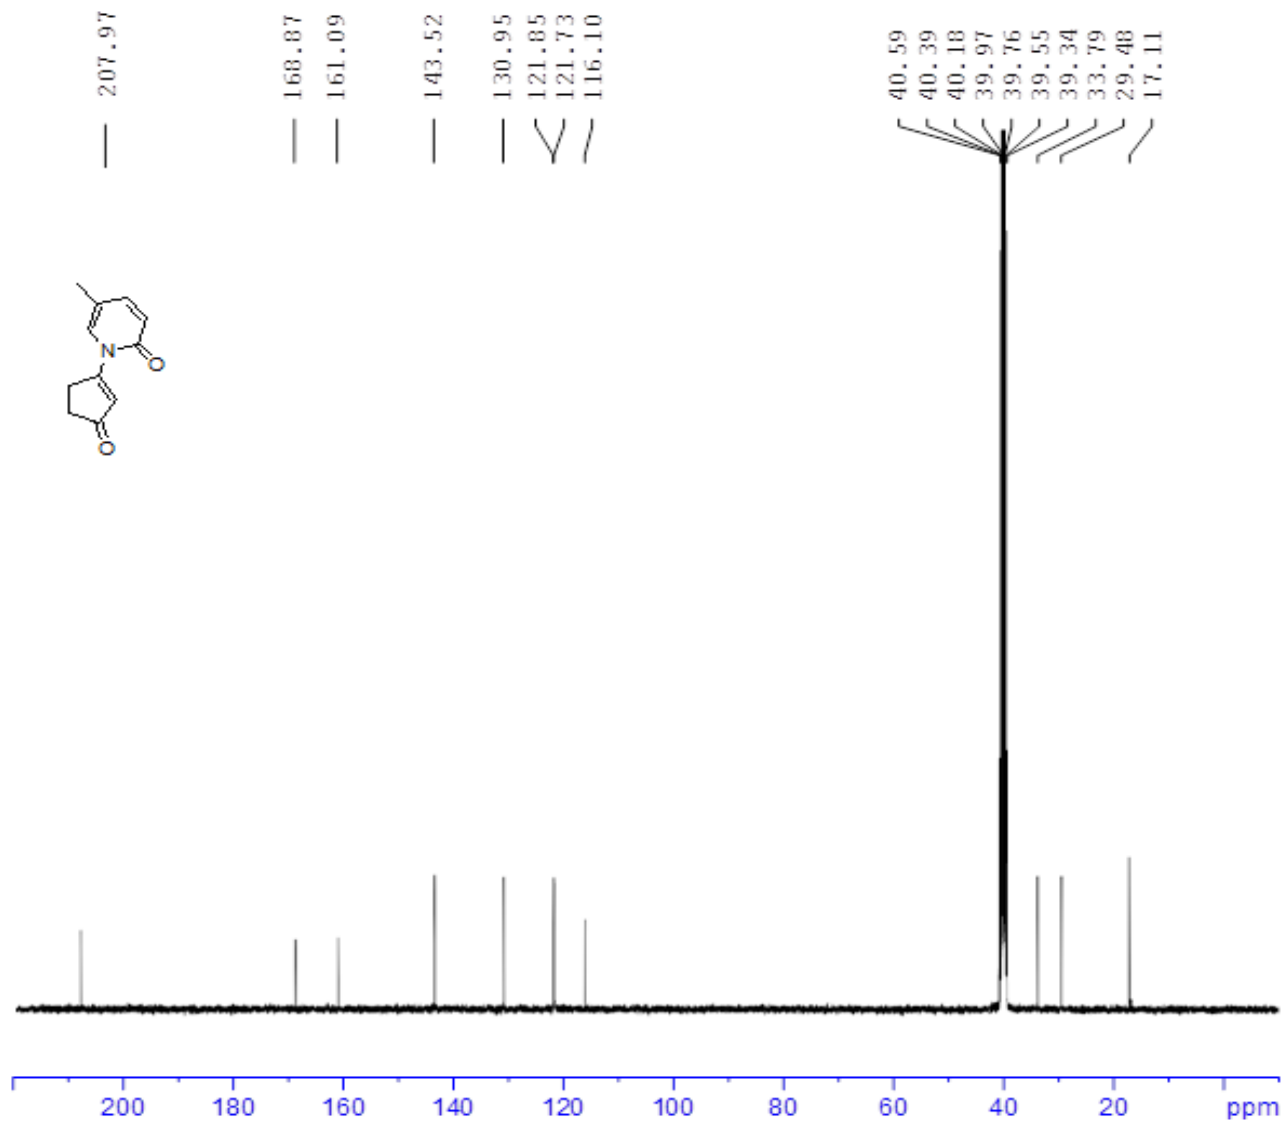

## New Journal of Chemistry

### 11. IR spectra of 5-methyl-1-(3-oxocyclopent-1-enyl) pyridin-2 (1 H)-one, 5a

Fri Jan 04 15:08:02 2013 (GMT+05:30)

#### IR Report

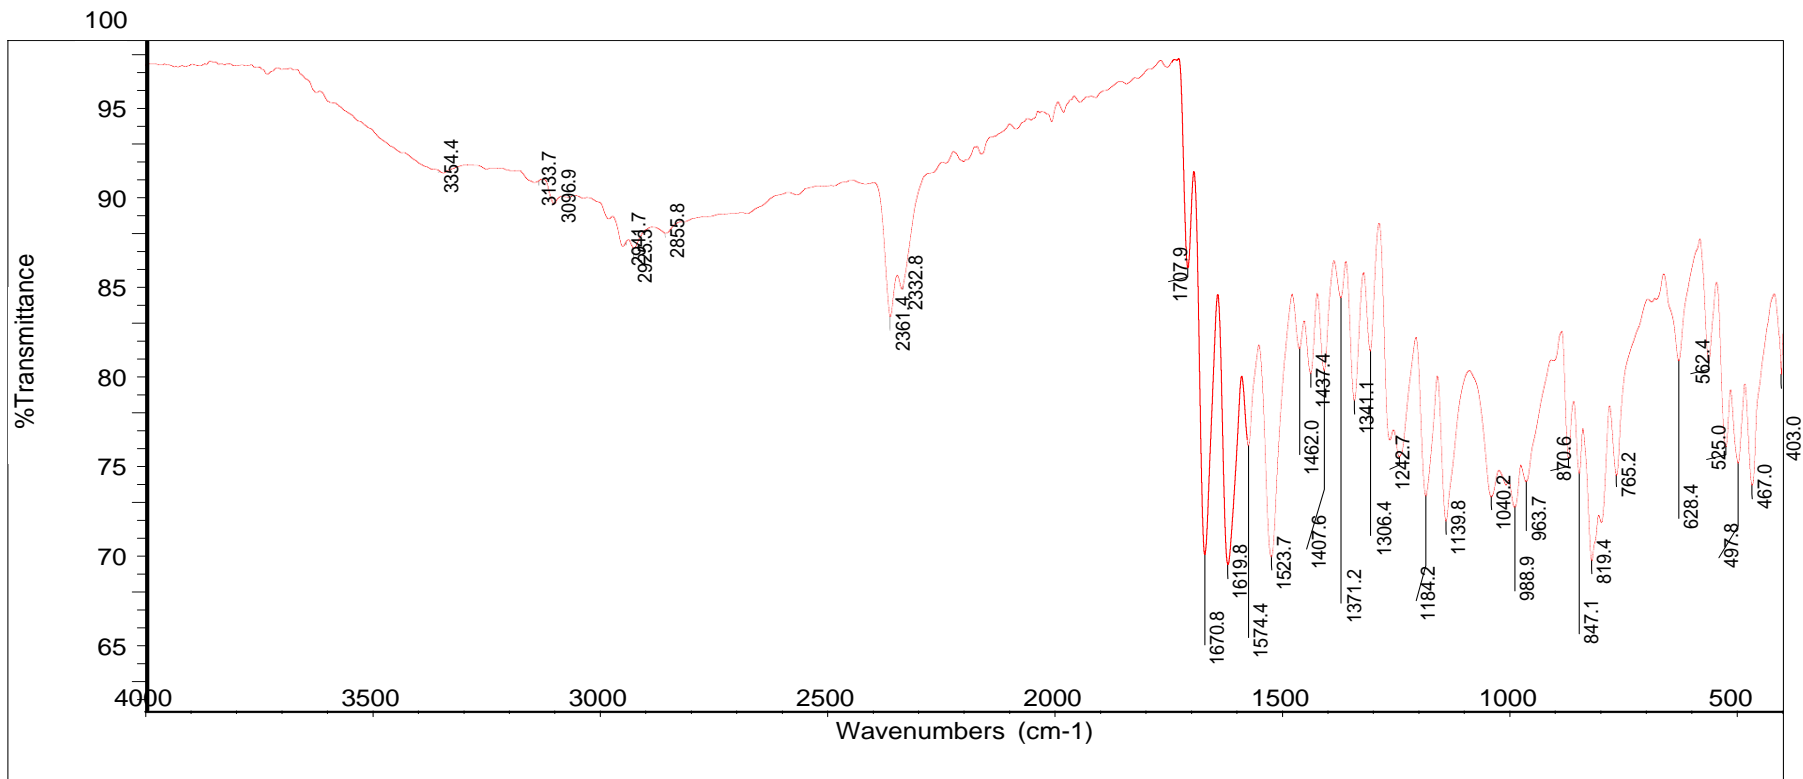

## New Journal of Chemistry

### 12. LCMS spectra of 5-methyl-1-(3-oxocyclopent-1-enyl) pyridin-2 (1 H)-one, 5a

-----  
Vial No. : P2-B-01  
Injection vol : 2.0uL  
Acq Method : METHODS\AT 595FAD.M  
-----  
Method info : A-0.1%HCOOH; B-ACNFlow: 1.2ml/min,  
Column-ATLANTIS C18 (50X4.6mm-5µm,) DUAL MODE  
TIME (MIN) : 0--3 3--4 4--4.5 4.5--6  
%B 5-95 95 95-5 5

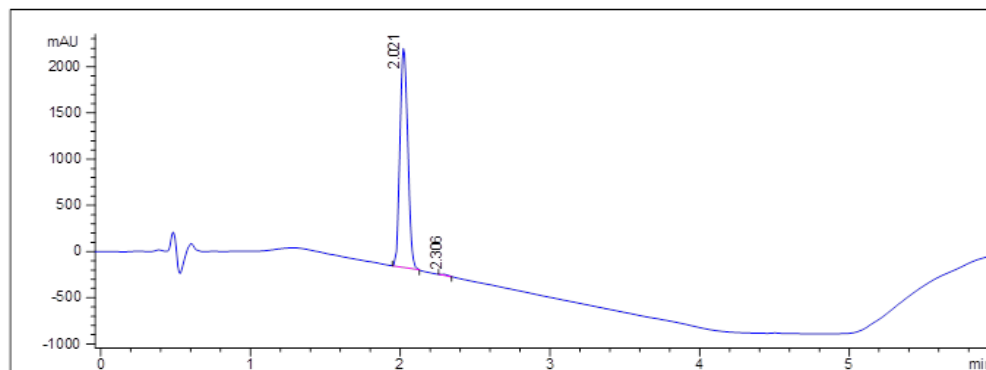

| Peak No | RT min | Area       | Area % |
|---------|--------|------------|--------|
| 1       | 2.021  | 8.626e+003 | 99.392 |
| 2       | 2.306  | 5.277e+001 | 0.608  |

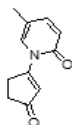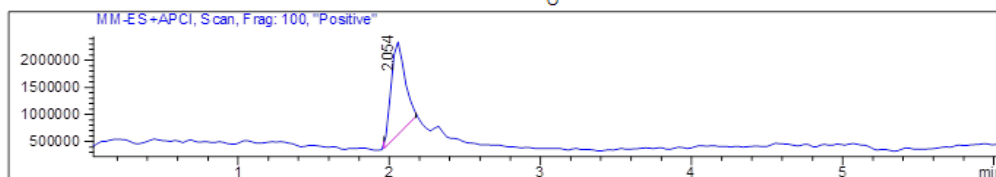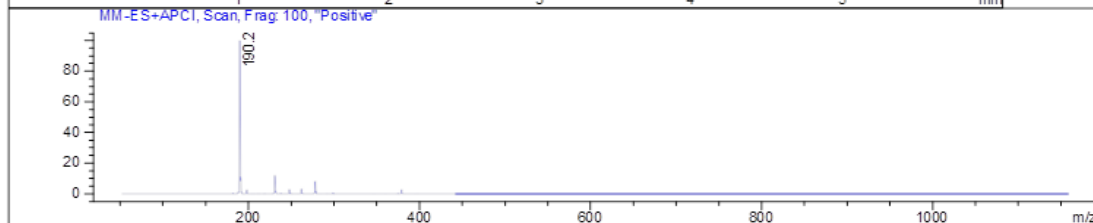



## New Journal of Chemistry

### 13. <sup>1</sup>H NMR spectra of 4-methyl-3-nitro-1-(3-oxocyclopent-1-enyl) pyridin-2 (1 H)-one, 5b

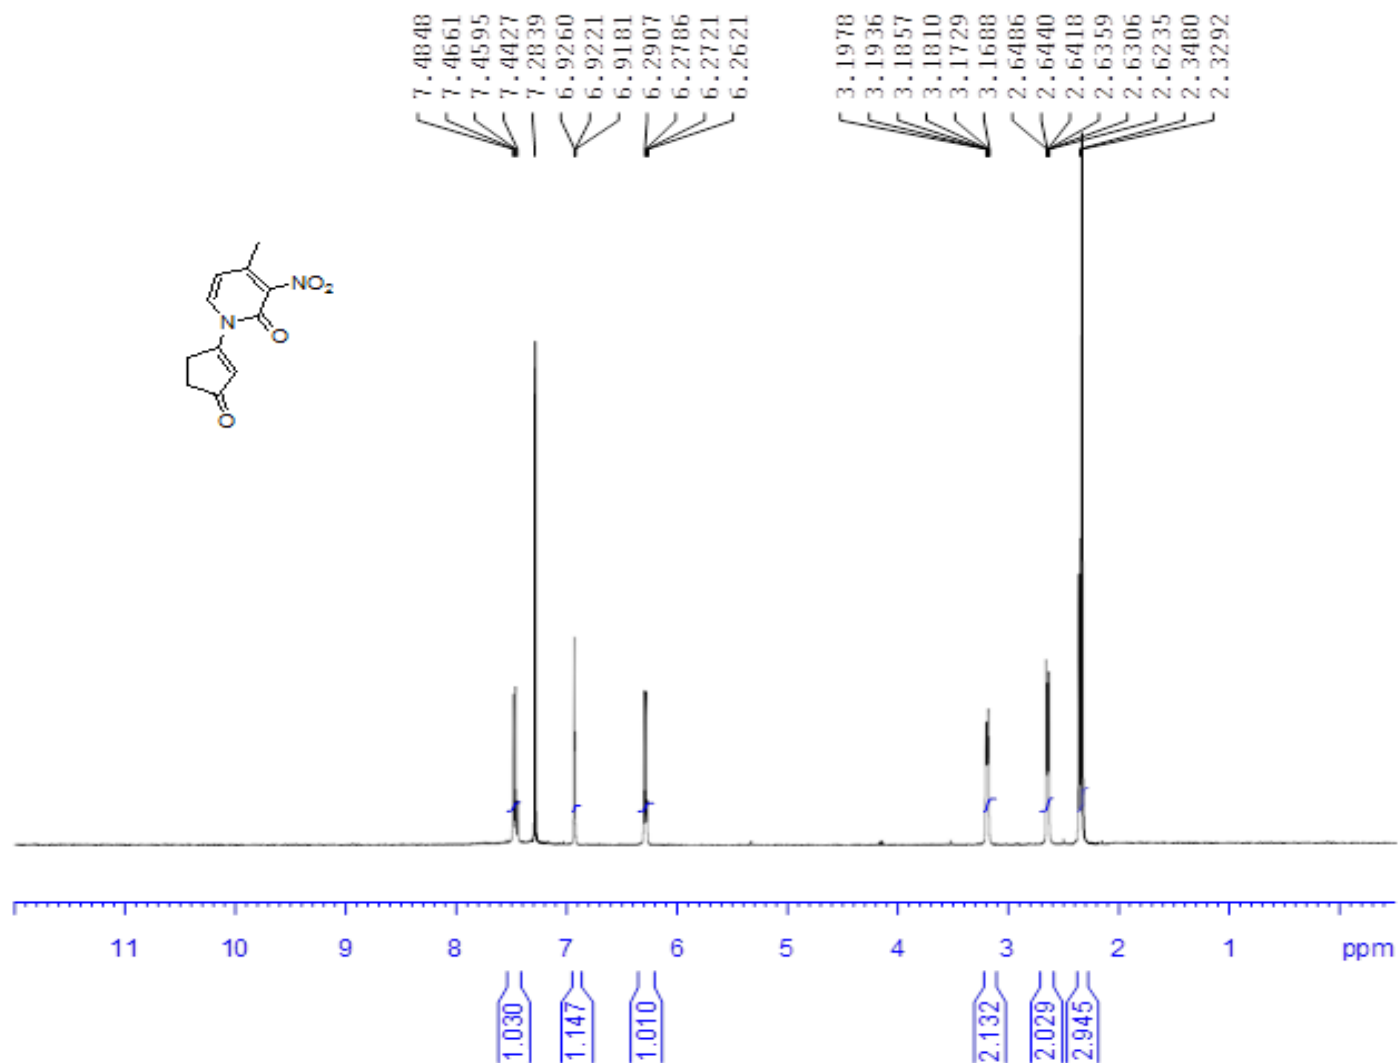

## New Journal of Chemistry

### 14. <sup>13</sup>C NMR spectra of 4-methyl-3-nitro-1-(3-oxocyclopent-1-enyl) pyridin-2 (1 H)-one, 5b

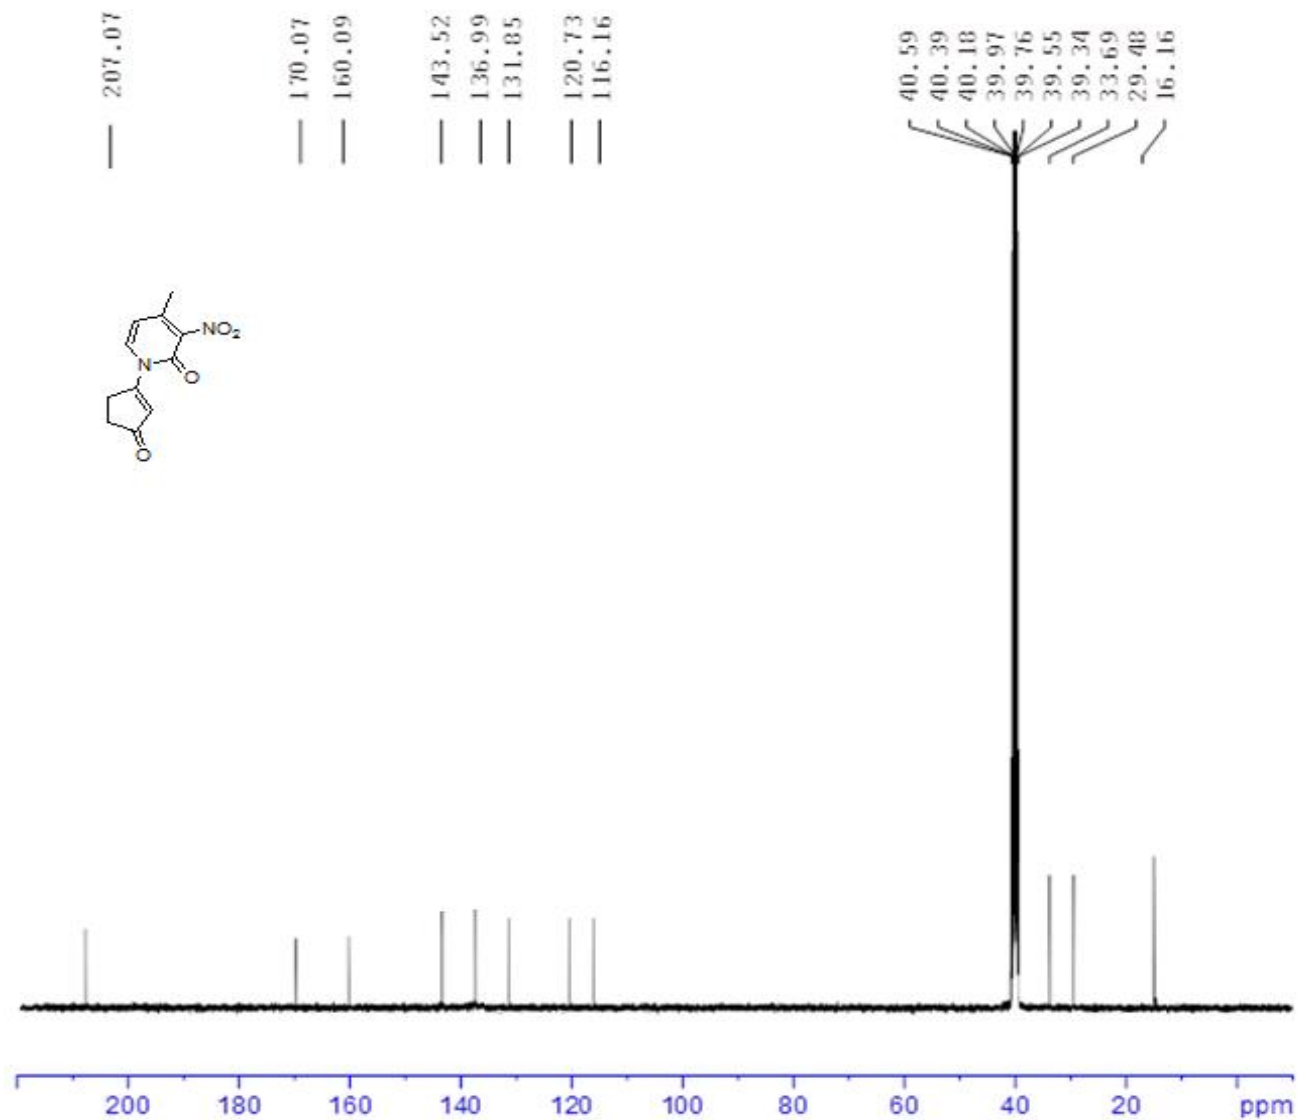

## New Journal of Chemistry

### 15. IR spectra of 4-methyl-3-nitro-1-(3-oxocyclopent-1-enyl) pyridin-2 (1 H)-one, 5b

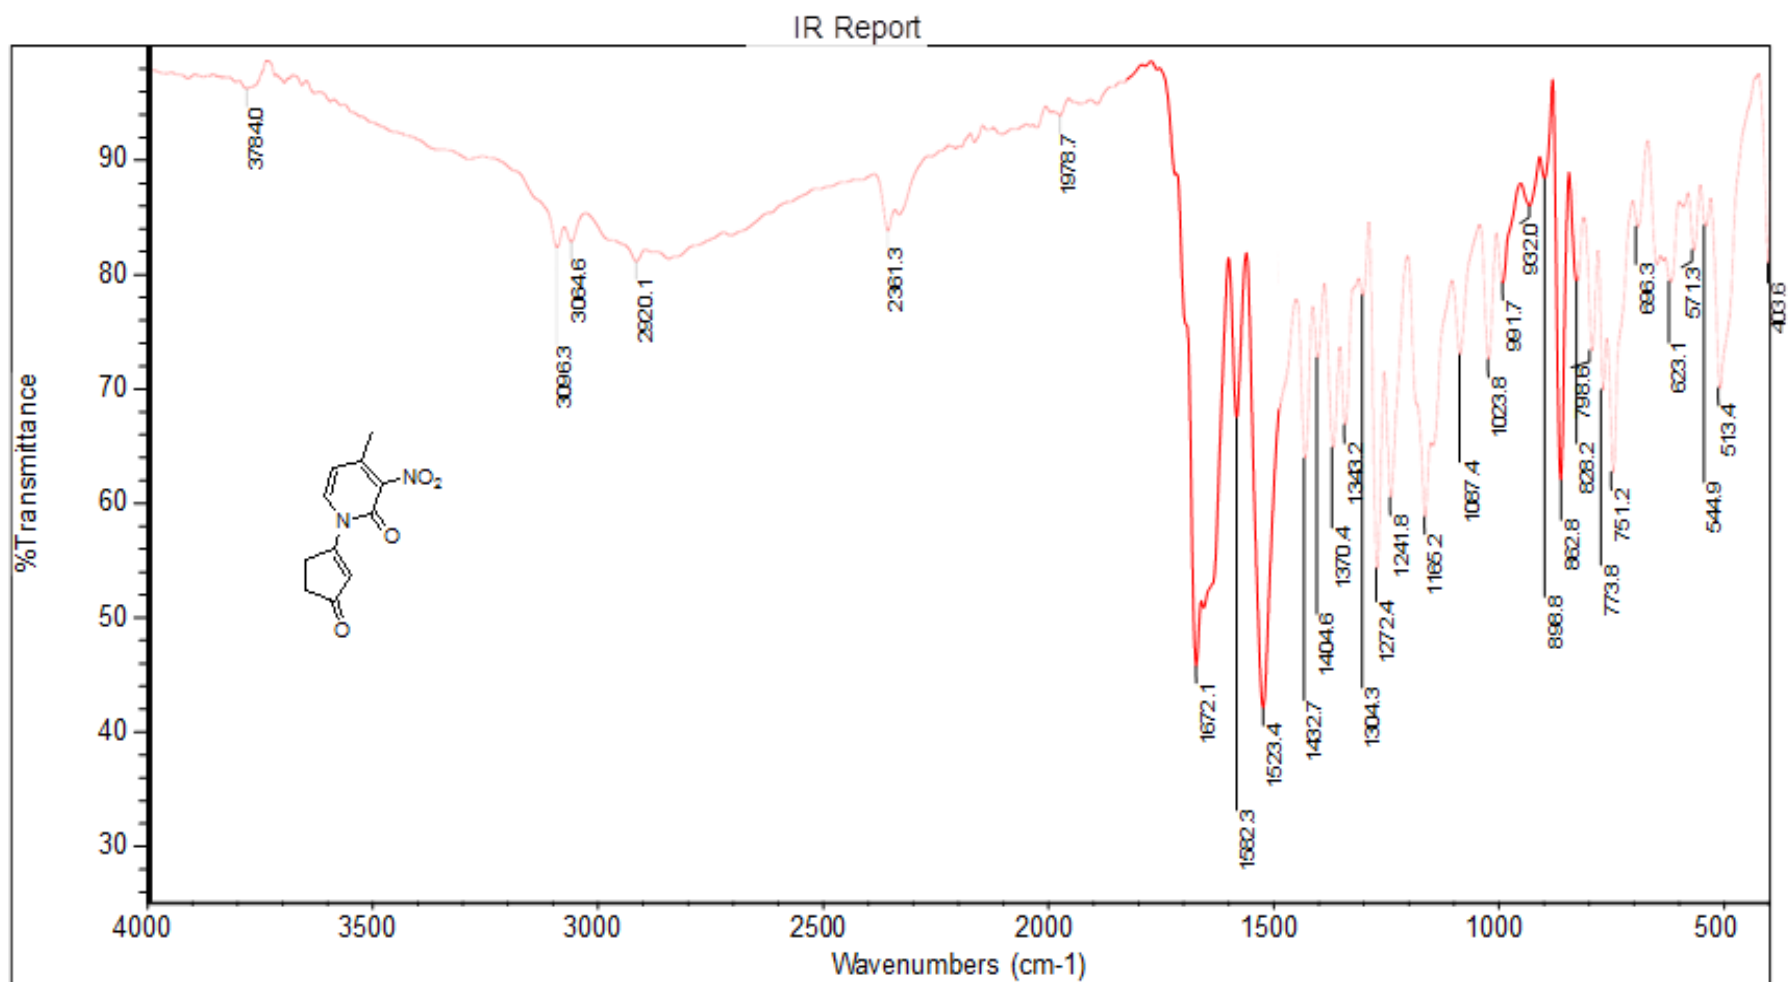

## New Journal of Chemistry

### 16. LCMS spectra of 4-methyl-3-nitro-1-(3-oxocyclopent-1-enyl) pyridin-2 (1 H)-one, 5b

```
=====
Vial No.      : P1-C-01
Acq Method   : C:\CHEM32\1\METHODS\AT_595FAD.M
Injection vol : 2.0ul
=====
Method info  : A-0.1%HOAc;B-ACN Flow: 1.5ml/min,
               Column-ATLANTIS C18 (50X4.6mm-5µm, ) DUAL MODE
TIME (MIN)   : 0--3      3--4      4--4.5  4.5-6
               %B       5-95       95     95-5     5
=====
```

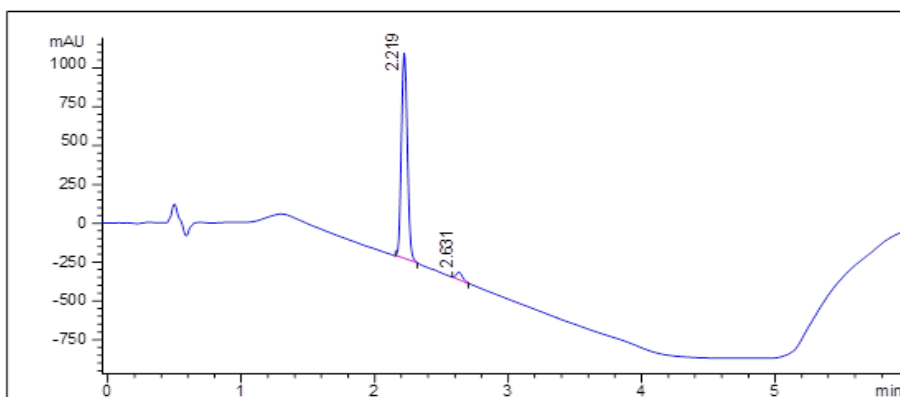

| Peak No | RT min | Area    | Area % |
|---------|--------|---------|--------|
| 1       | 2.22   | 4087.59 | 96.42  |
| 2       | 2.63   | 151.70  | 3.58   |

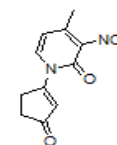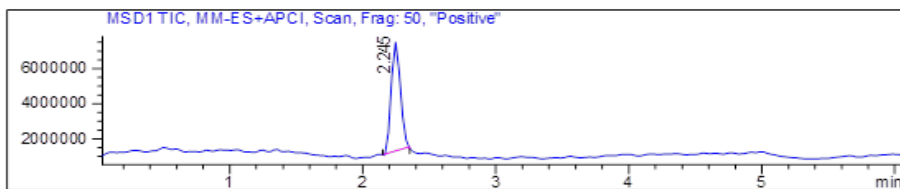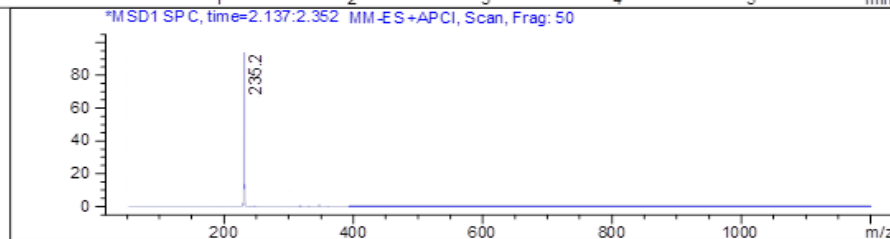

## New Journal of Chemistry

### 17. <sup>1</sup>H NMR Spectra of 1-(3-oxocyclopent-1-enyl) pyridin-2 (1 H)-one, 5c

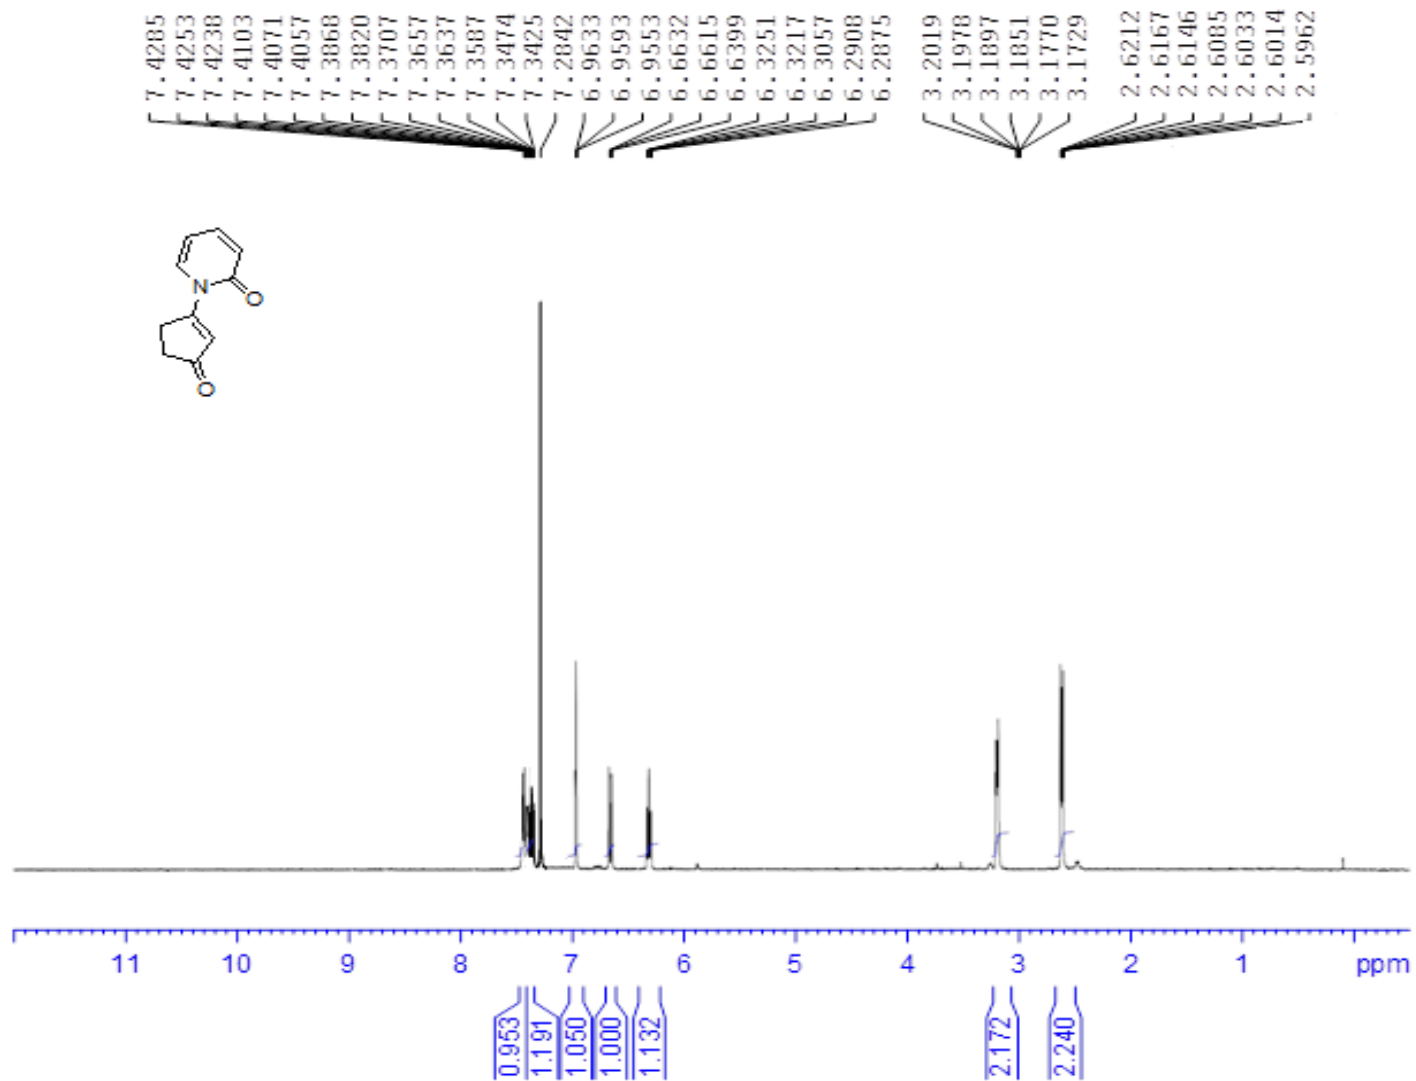

## New Journal of Chemistry

### 18. <sup>13</sup>C NMR Spectra of 1-(3-oxocyclopent-1-enyl) pyridin-2 (1 H)-one, 5c

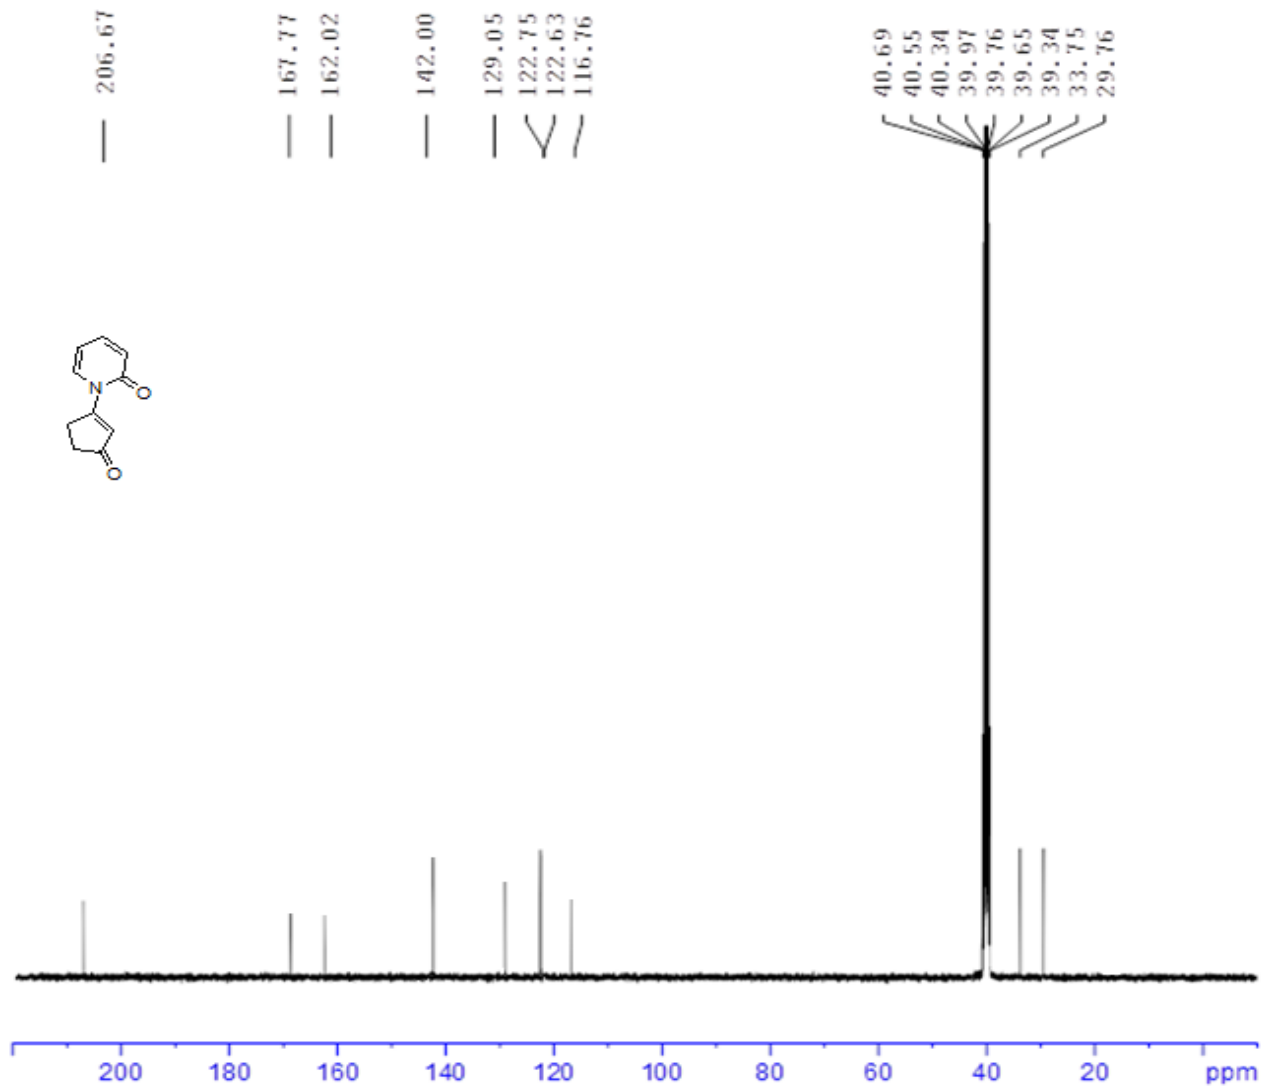

## New Journal of Chemistry

### 19. IR Spectra of 1-(3-oxocyclopent-1-enyl) pyridin-2 (1 H)-one, 5c

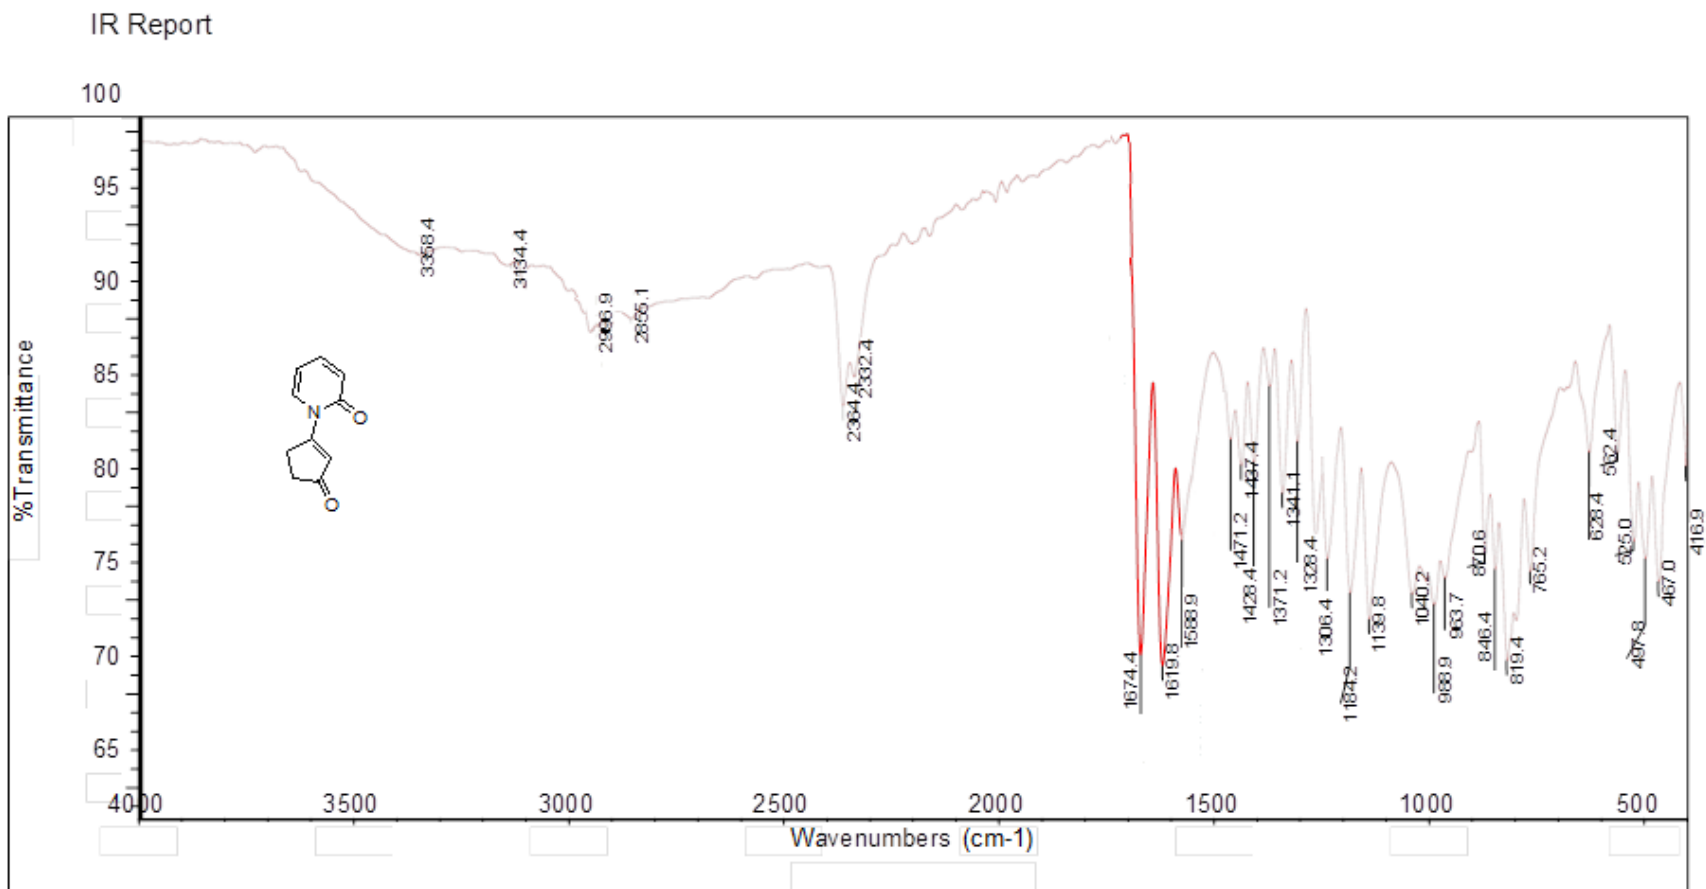

## New Journal of Chemistry

### 20. LCMS Spectra of 1-(3-oxocyclopent-1-enyl) pyridin-2 (1 H)-one, 5c

Vial No. : P1-B-07  
Acq Method : D:\METHODS\NONPOLAR-A.M  
Injection vol : 2.0ul

Method info : A-0.1%HCOOH IN WATER; B-0.1%HCOOH IN ACN Flow = 1.0ML/MIN  
Column-Acquity BEH C18 (50X2.1mm-1.7µm)  
Time (min.): 0---0.2 0.2---1.5 1.5-2.5 2.5-2.7  
% B: 70-100 100 100 100--70

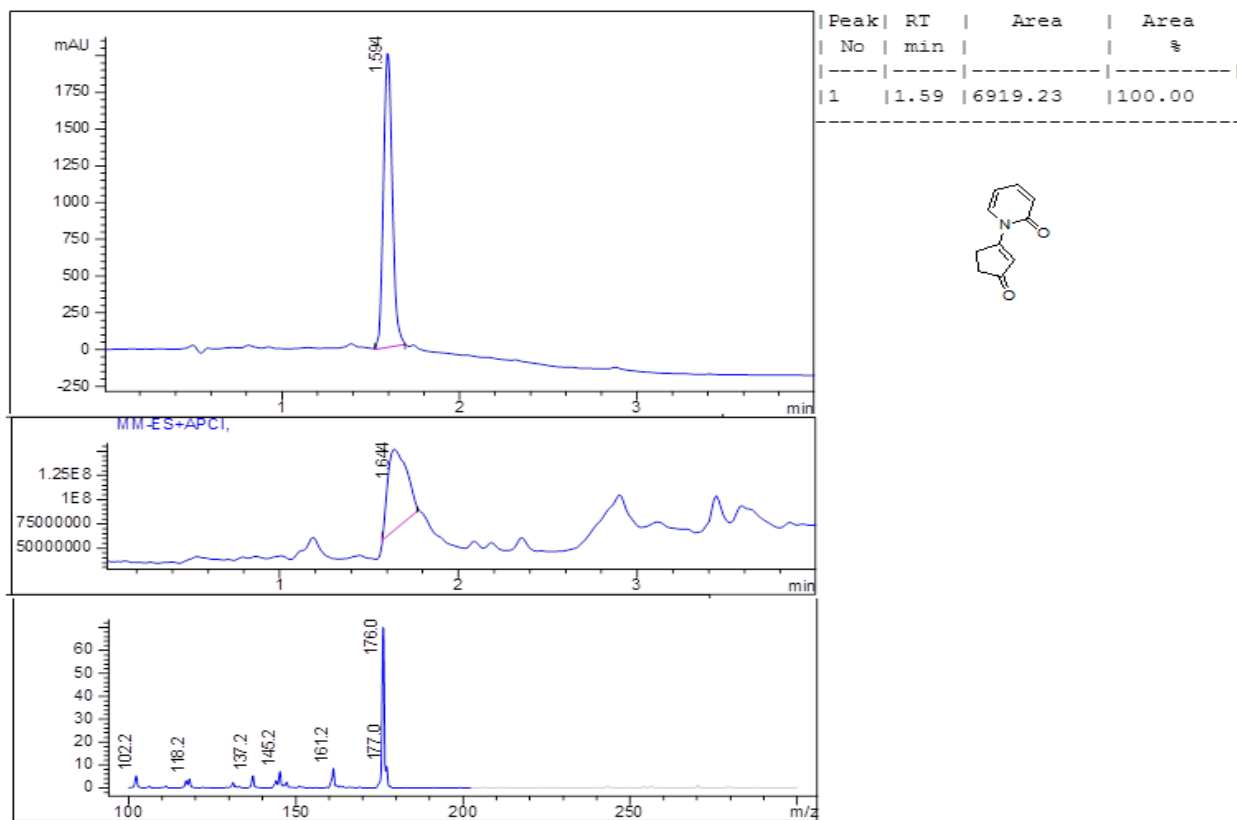



## New Journal of Chemistry

### 21. <sup>1</sup>H NMR Spectra of 3-methyl-1-(3-oxocyclopent-1-enyl) pyridin-2 (1 H)-one, 5d

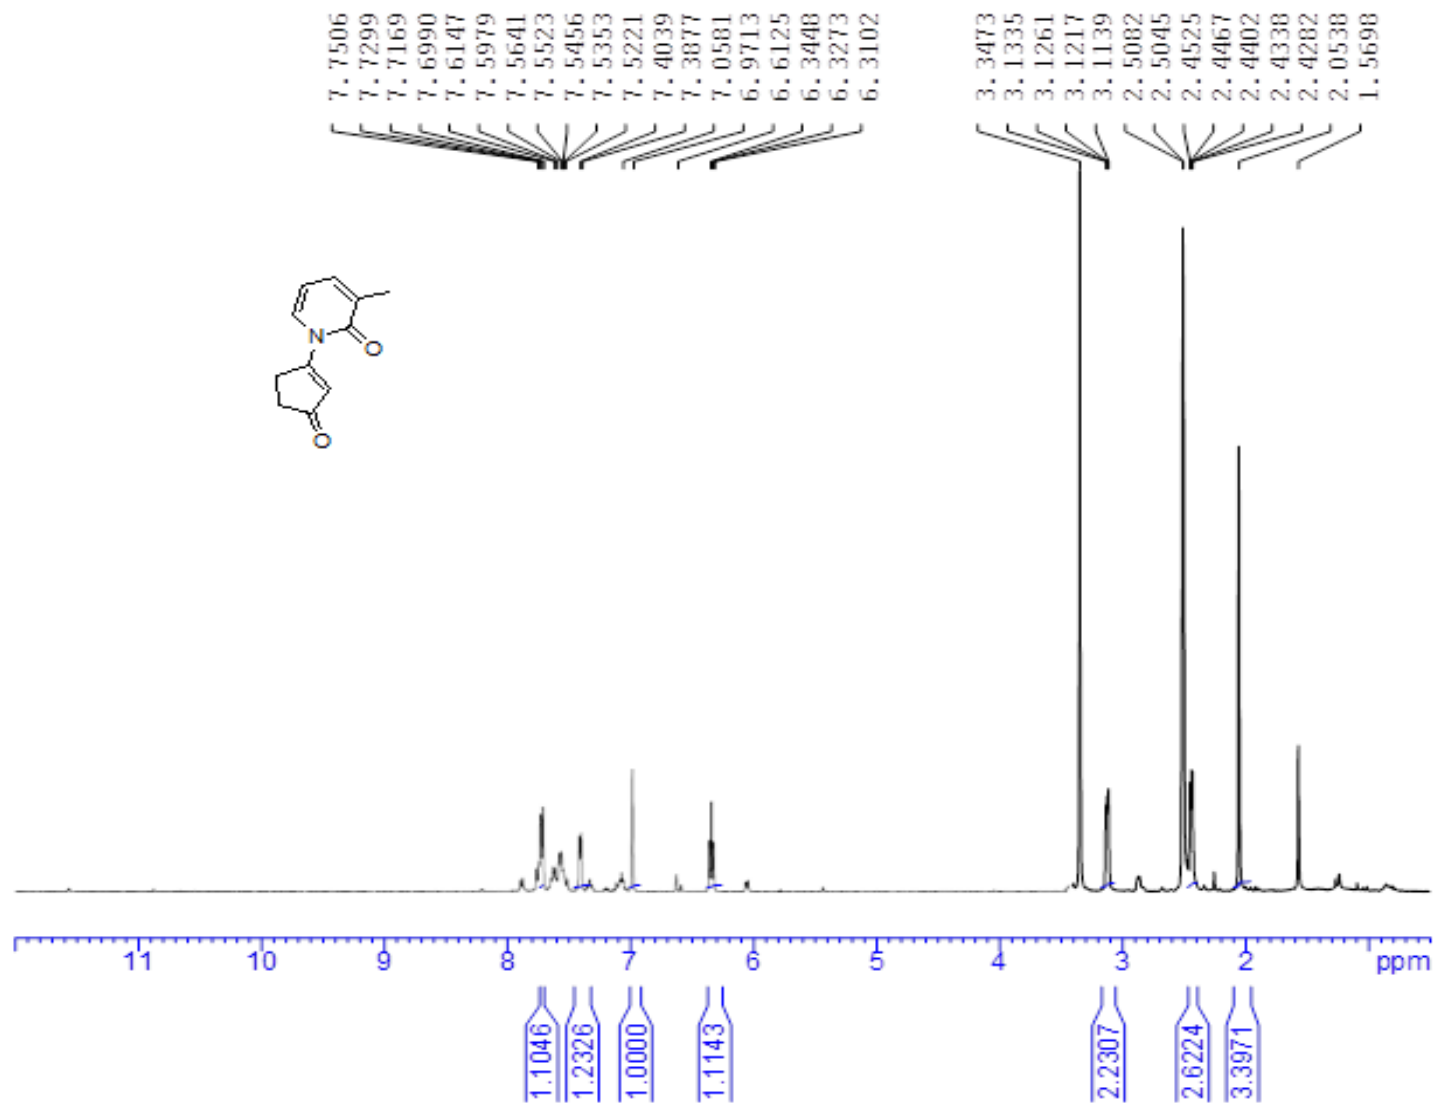

## New Journal of Chemistry

### 22. <sup>13</sup>C NMR Spectra of 3-methyl-1-(3-oxocyclopent-1-enyl) pyridin-2 (1 H)-one, 5d

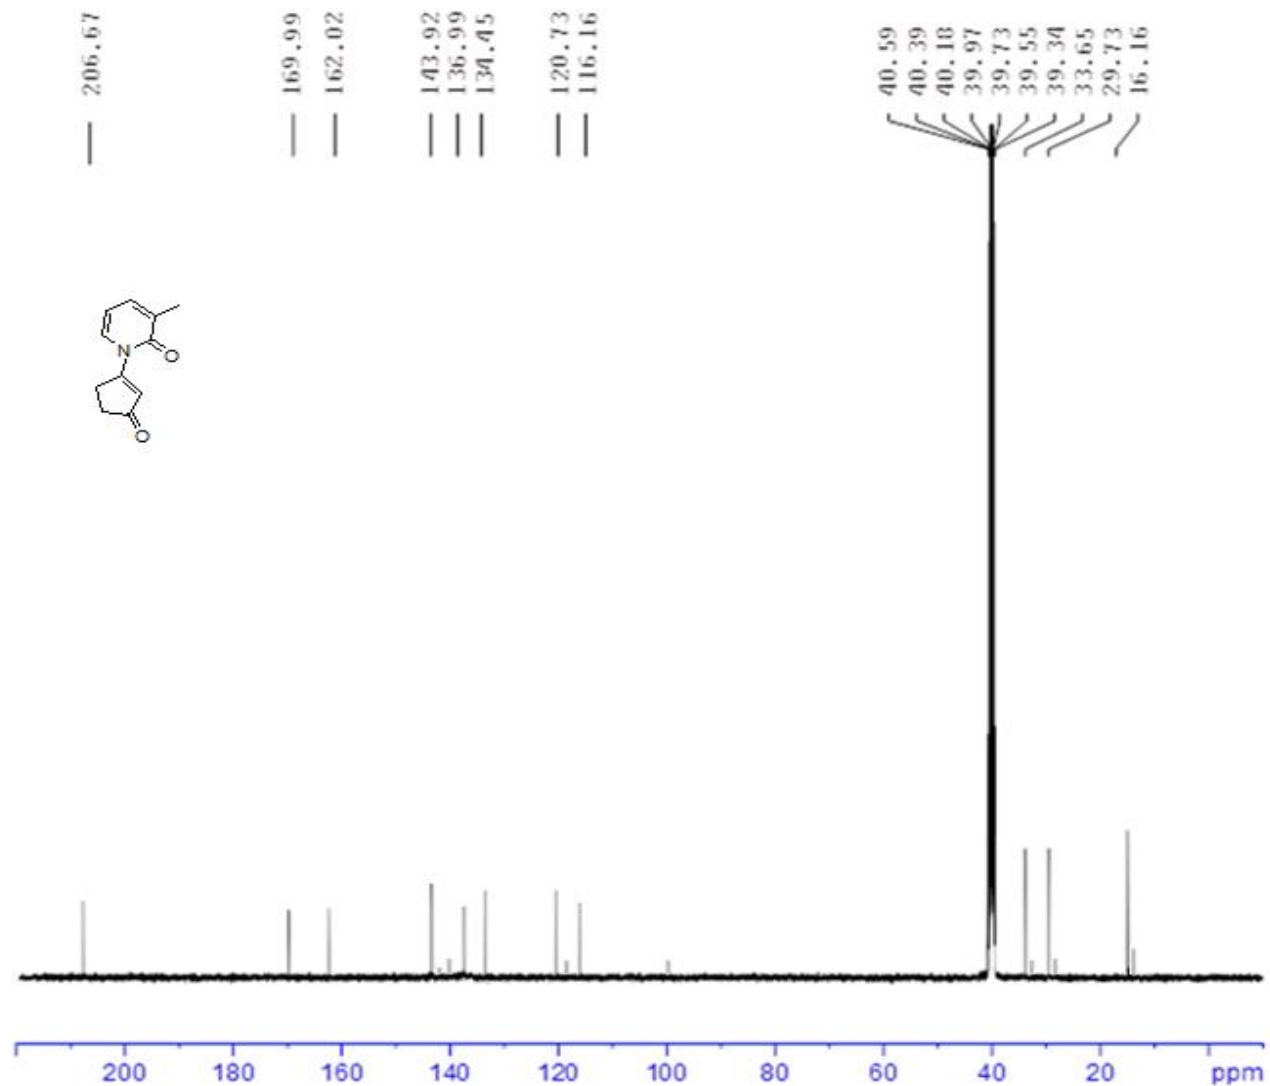

## New Journal of Chemistry

### 23. LCMS Spectra of 3-methyl-1-(3-oxocyclopent-1-enyl) pyridin-2 (1 H)-one, 5d

Vial No. : P1-B-02  
Injection vol : 2.0uL  
Acq Method : METHODS\AT\_595FAD.M

Method info : A-0.1% HCOOH; B-ACN Flow: 1.2ml/min,  
Column-ATLANTIS C18 (50X4.6mm-5µm,) DUAL MODE  
TIME (MIN) : 0--3 3--4 4--4.5 4.5--6  
%B 5-95 95 95-5 5

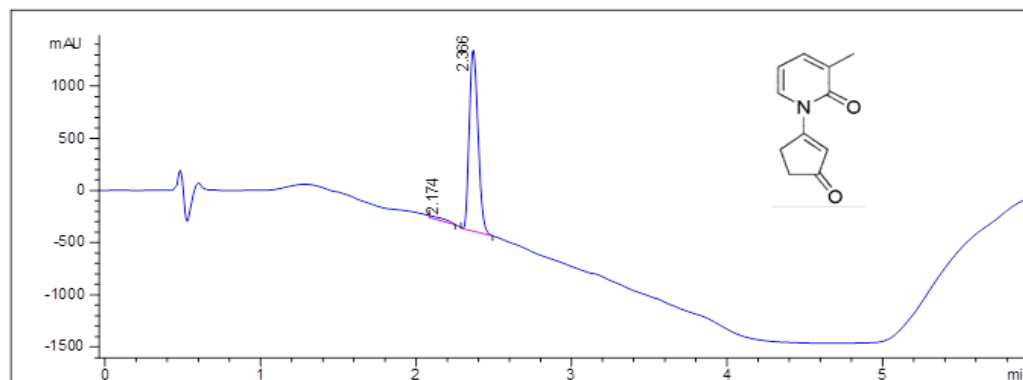

| Peak No | RT min | Area       | Area % |
|---------|--------|------------|--------|
| 1       | 2.174  | 2.081e+002 | 2.960  |
| 2       | 2.366  | 6.822e+003 | 97.040 |

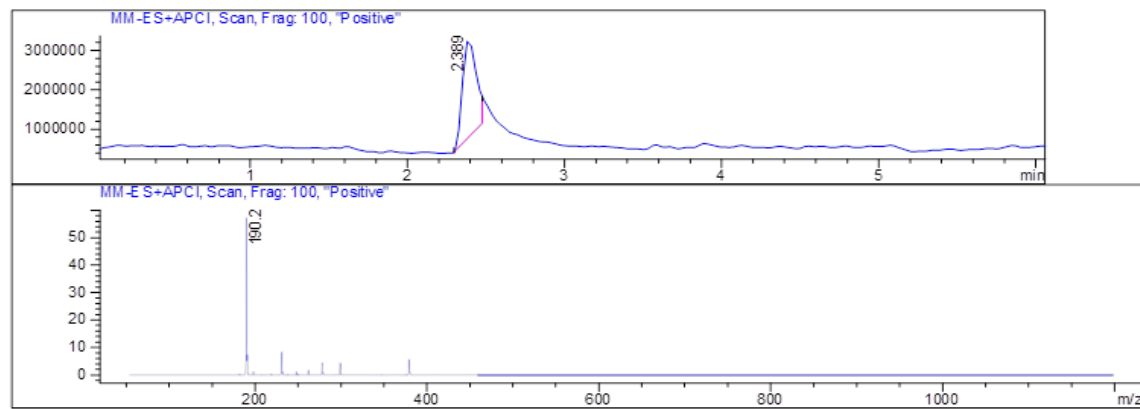

## New Journal of Chemistry

### 24. <sup>1</sup>H NMR Spectra of 4-methyl-1-(3-oxocyclopent-1-enyl) pyridin-2 (1 H)-one, 5e

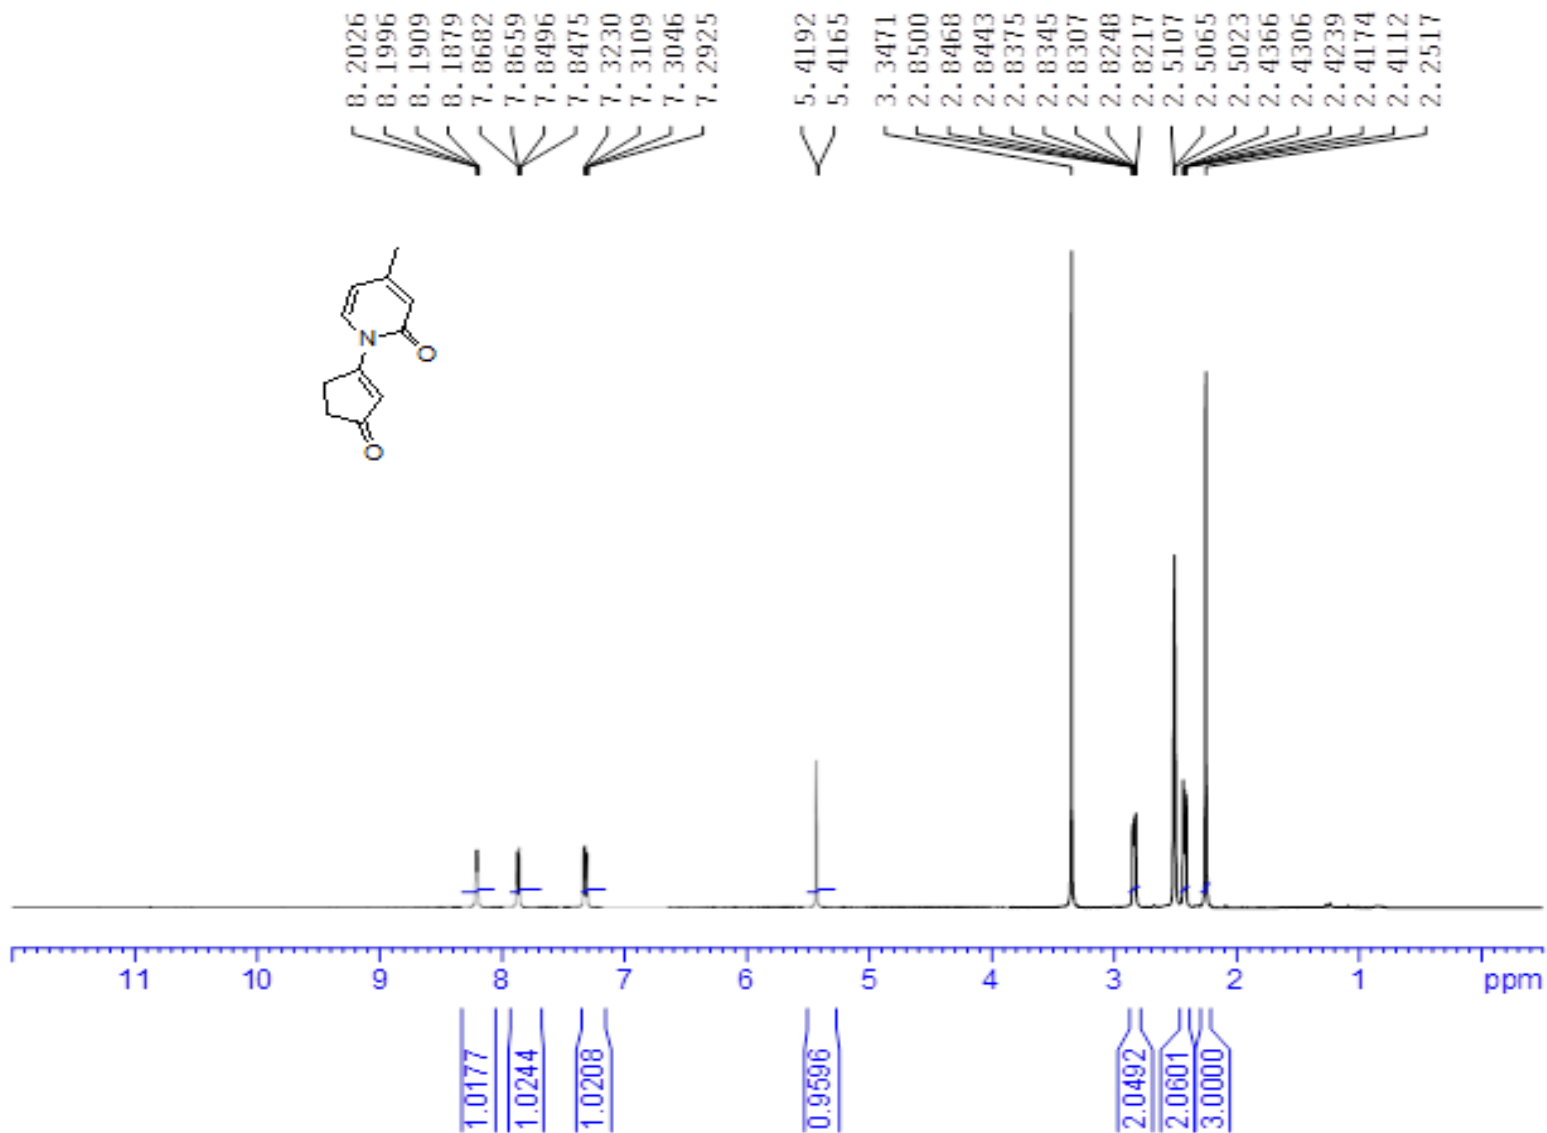

## New Journal of Chemistry

### 25. <sup>13</sup>C NMR Spectra of 4-methyl-1-(3-oxocyclopent-1-enyl) pyridin-2 (1 H)-one, 5e

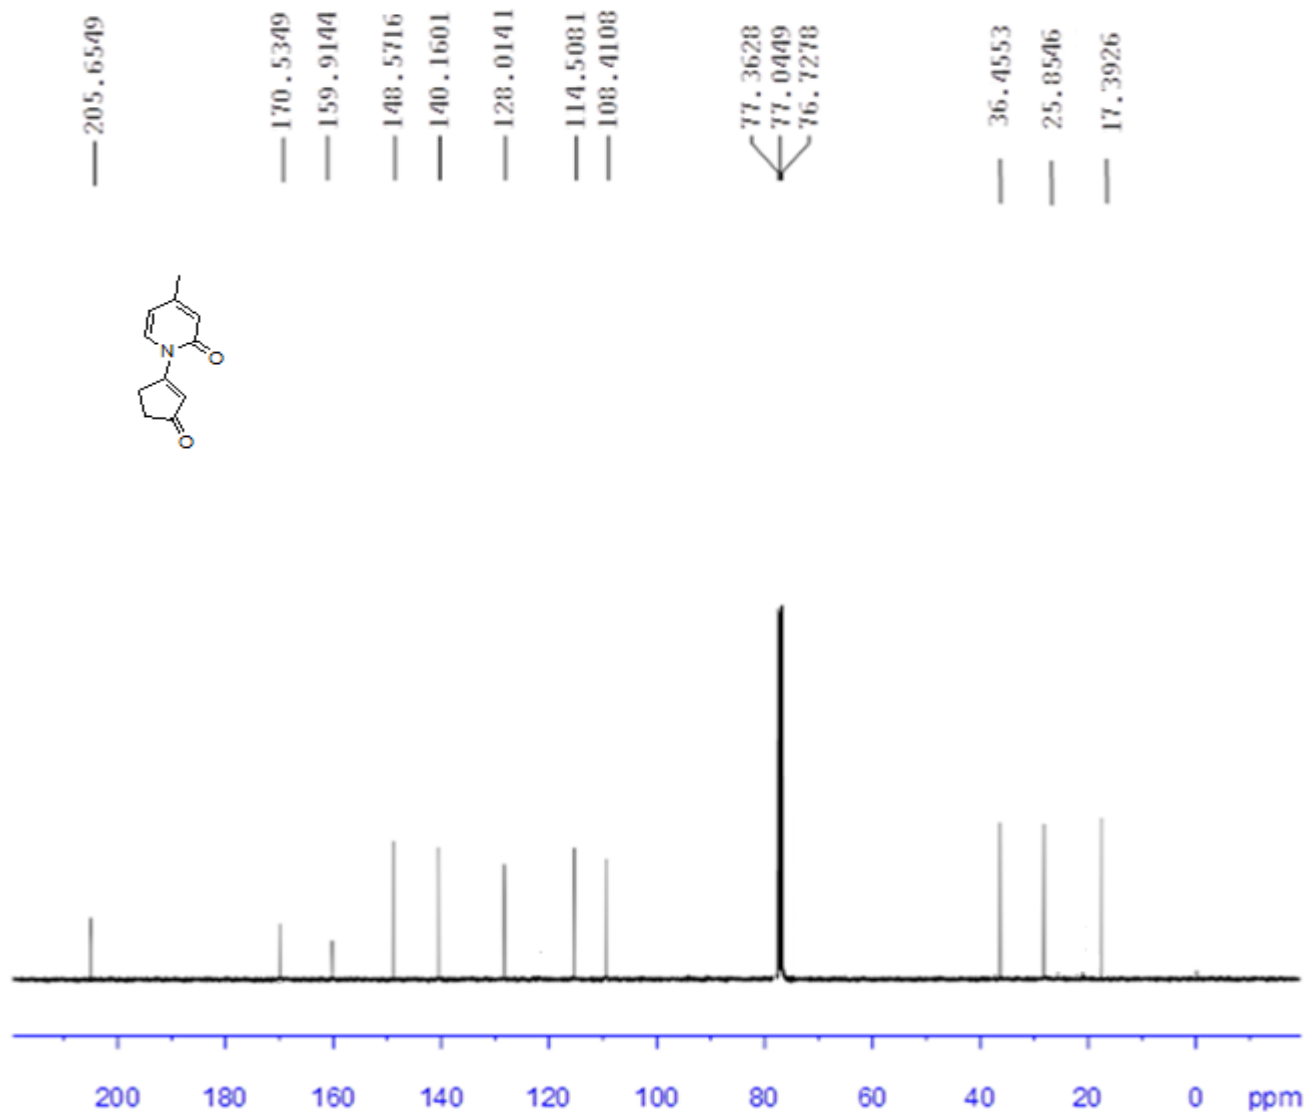

## New Journal of Chemistry

### 26. IR Spectra of 4-methyl-1-(3-oxocyclopent-1-enyl) pyridin-2 (1 H)-one, 5e

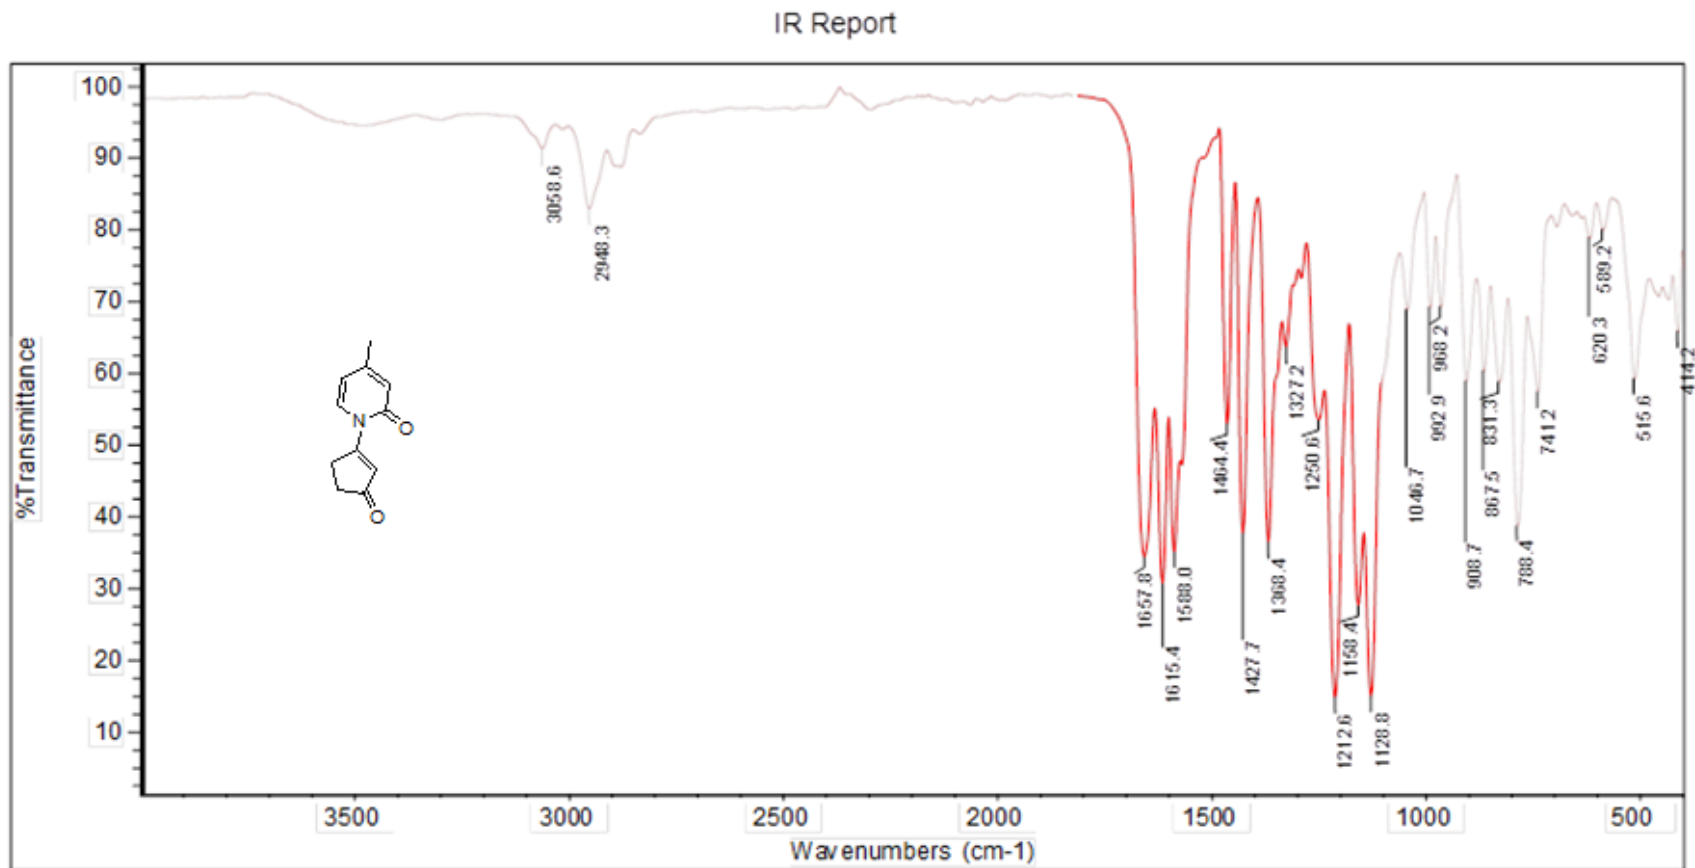

## New Journal of Chemistry

### 27. LCMS Spectra of 4-methyl-1-(3-oxocyclopent-1-enyl) pyridin-2 (1 H)-one, 5e

-----  
Injection vol : 2.0uL  
Acq Method : METHODS\AT\_595FAD.M  
-----  
Method info : A-0.1%HCOOH;B-ACN Flow: 1.5ml/min,  
Column-ATLANTIS dC18 (50X4.6mm-5µm, ) DUAL MODE  
TIME (MIN) : 0--3 3--4 4--4.5 4.5-6  
4B 5-95 95 95-5 5

| Peak No | RT min | Area       | Area % |
|---------|--------|------------|--------|
| 1       | 0.780  | 1.334e+001 | 1.025  |
| 2       | 2.880  | 1.288e+003 | 98.975 |

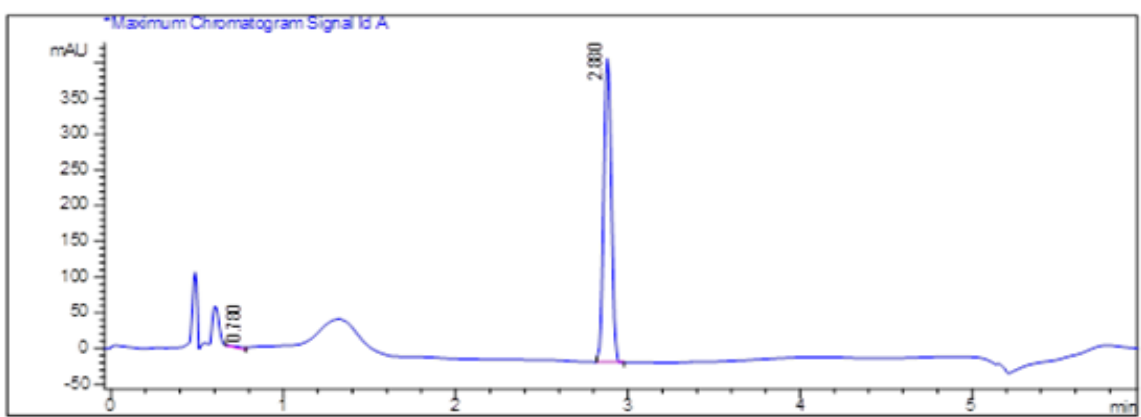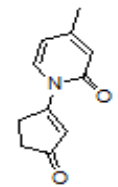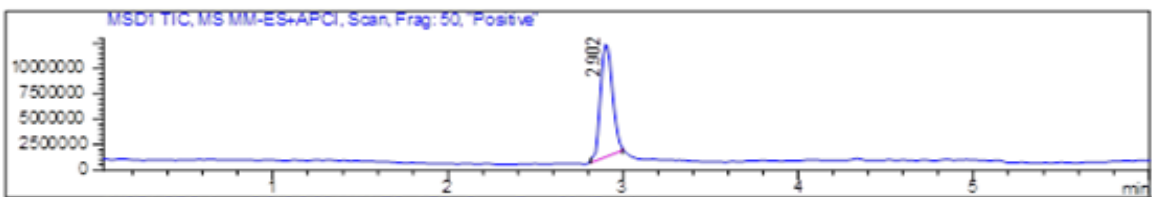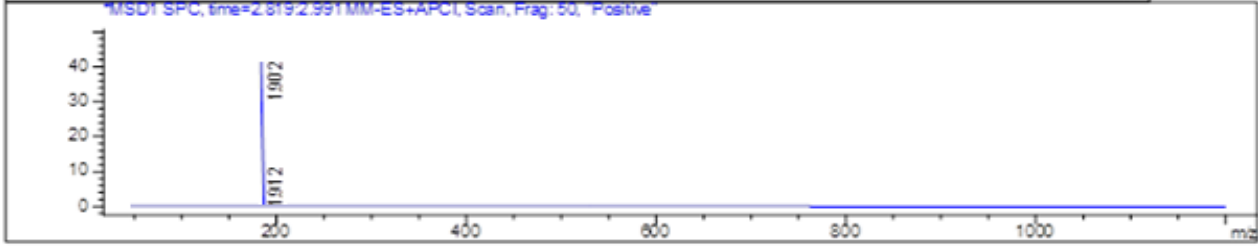

## New Journal of Chemistry

### 28. <sup>1</sup>H NMR Spectra of 5-nitro-1-(3-oxocyclopent-1-enyl) pyridin-2 (1 H)-one, 5f

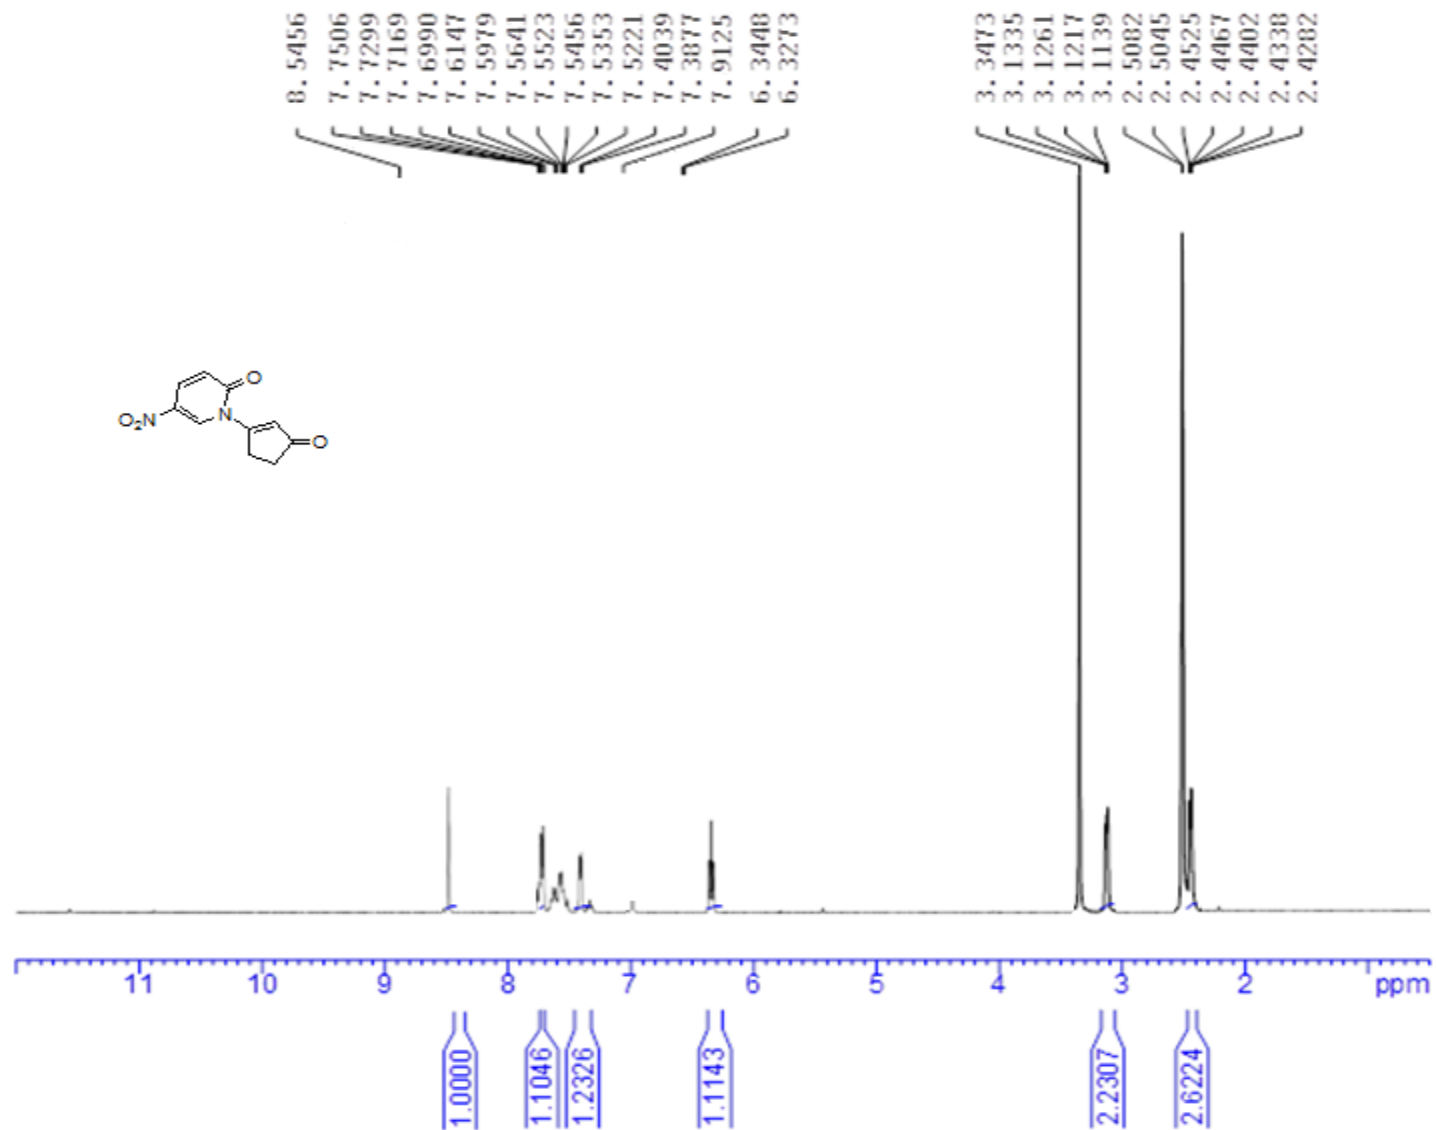



## New Journal of Chemistry

### 29. 13 CNMR Spectra of 5-nitro-1-(3-oxocyclopent-1-enyl) pyridin-2 (1 H)-one, 5f

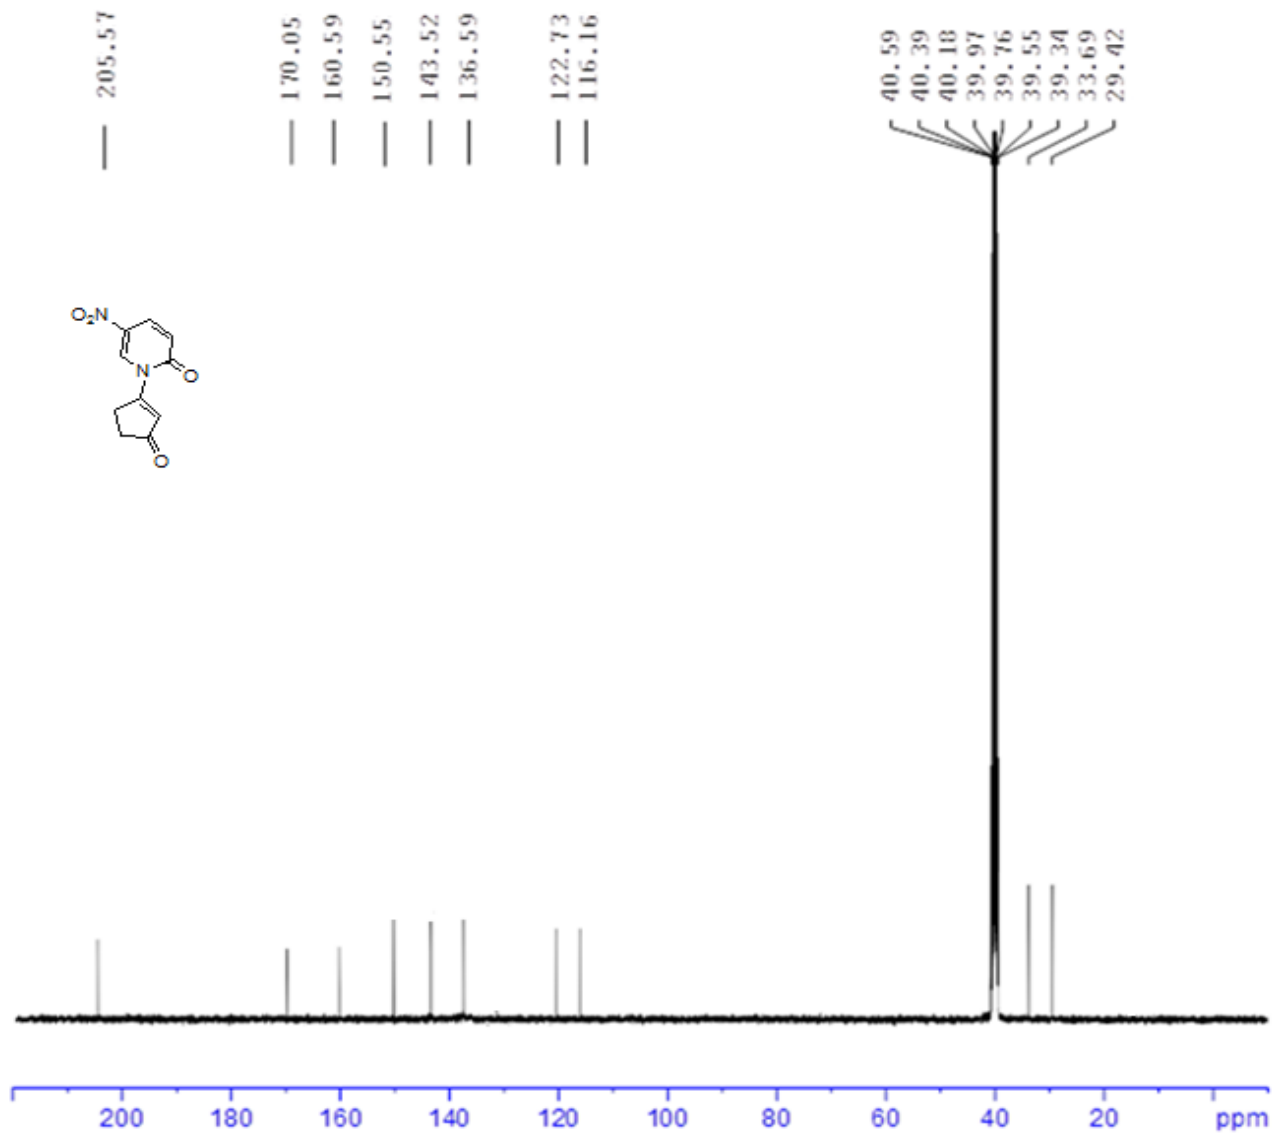

## New Journal of Chemistry

### 30. IR Spectra of 5-nitro-1-(3-oxocyclopent-1-enyl) pyridin-2 (1 H)-one, 5f

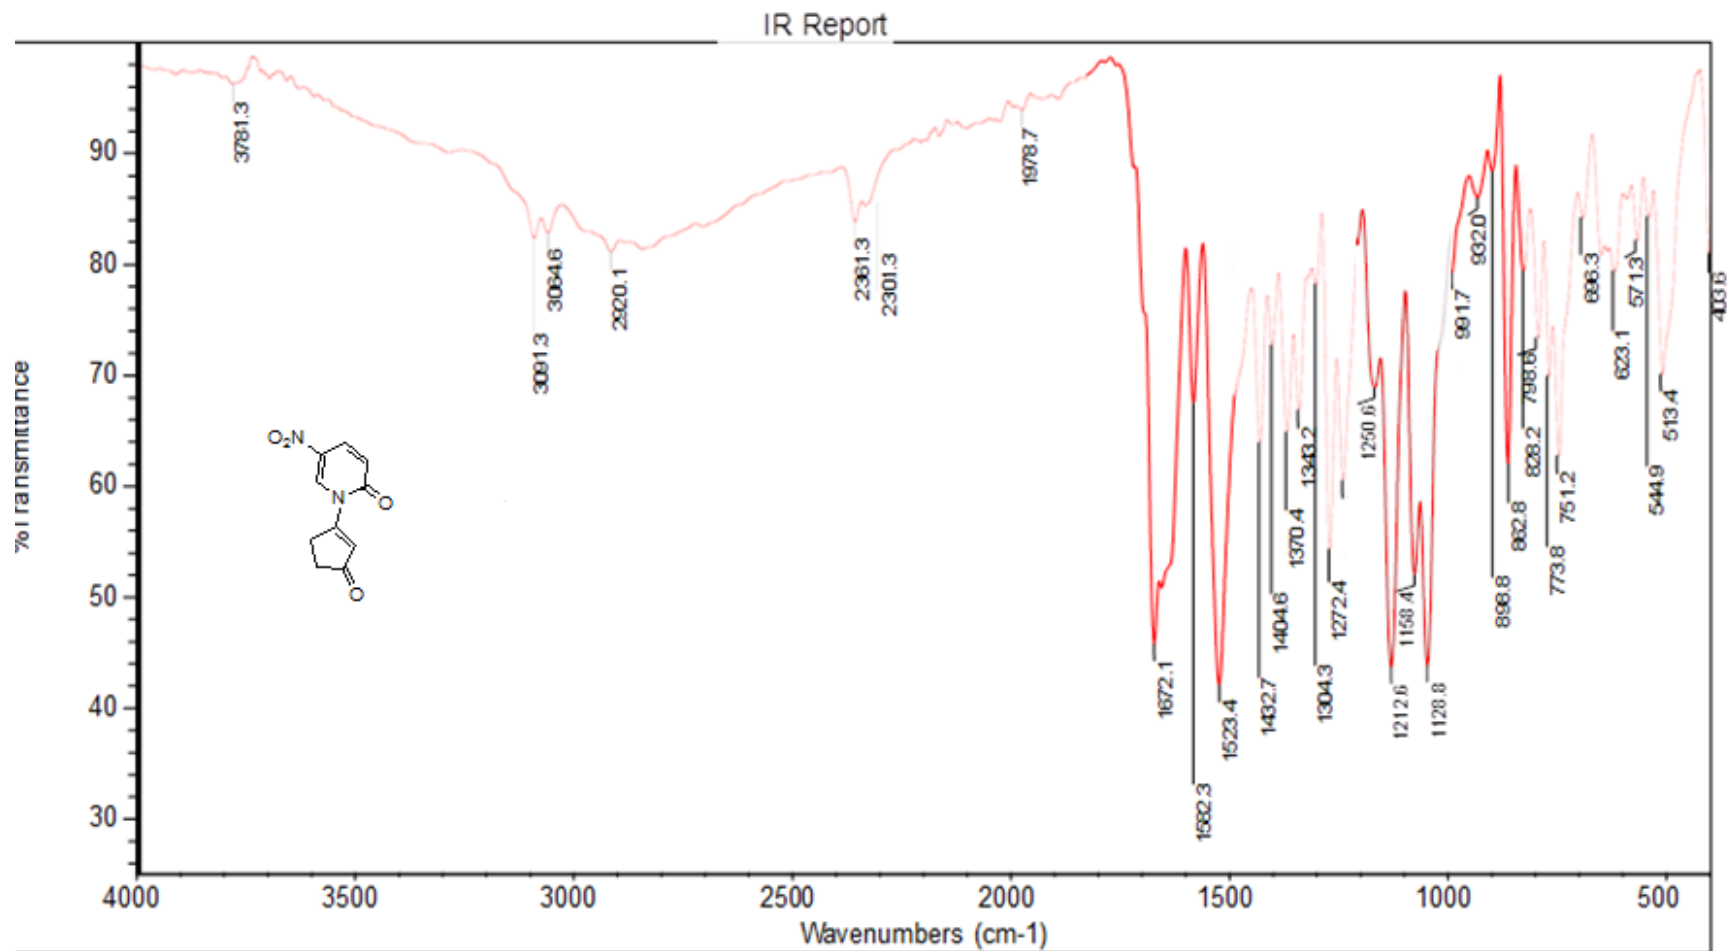

## New Journal of Chemistry

### 31. <sup>1</sup>H NMR Spectra of 1, 3-bis (3-oxocyclopent-1-enyl)-1 H-benzo[d]imidazol-2 (3 H)-one, 5i

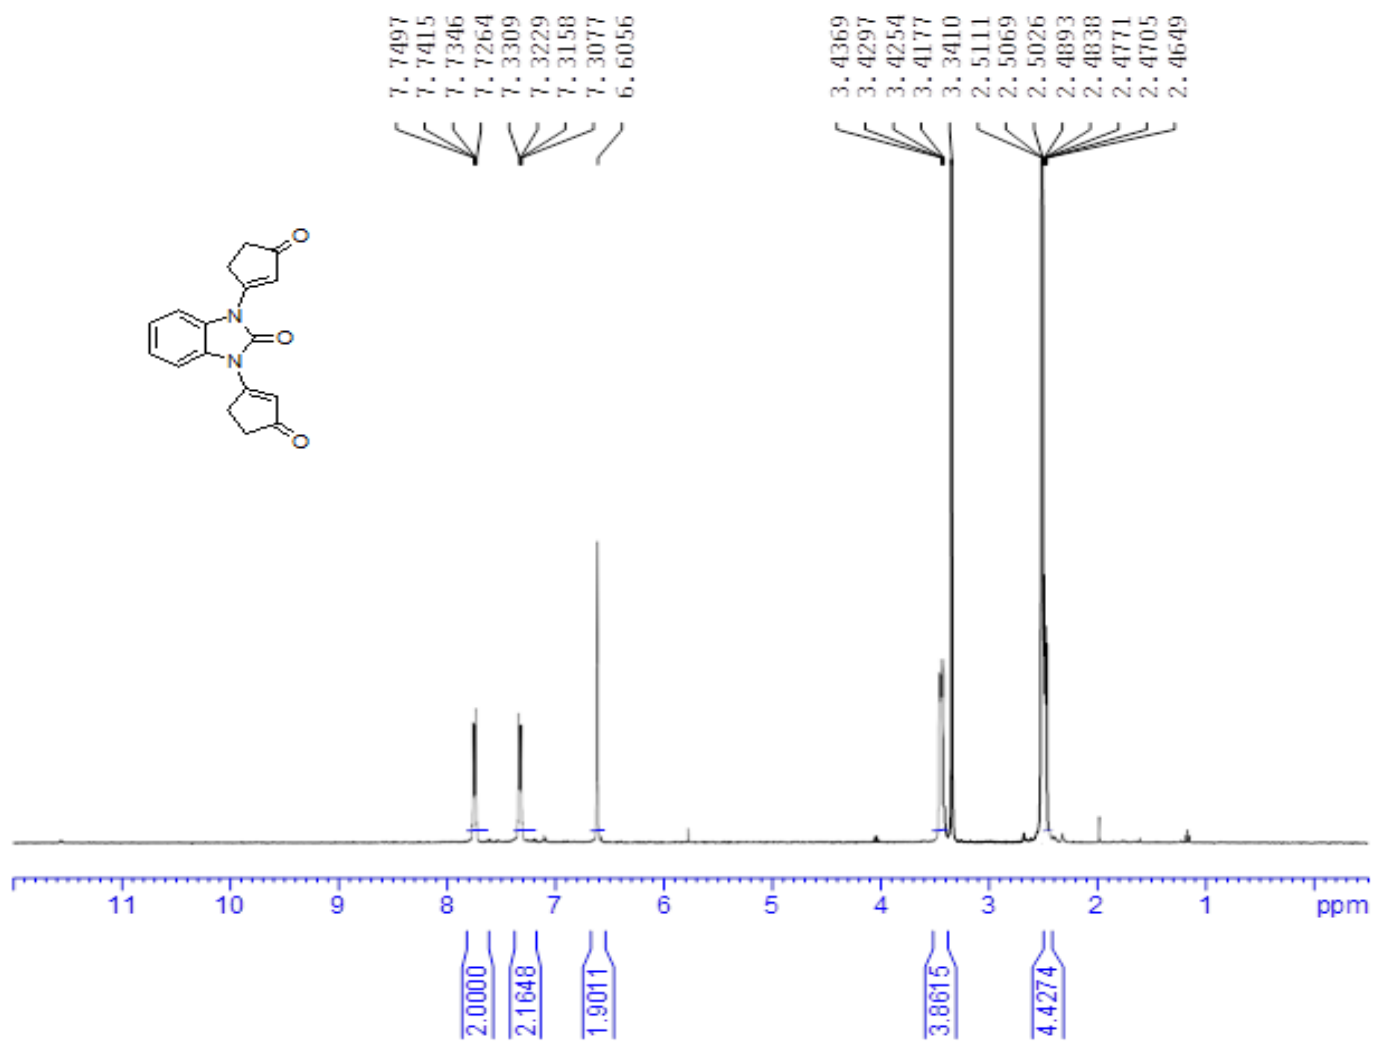

## New Journal of Chemistry

### 32. <sup>13</sup>C NMR Spectra of 1, 3-bis (3-oxocyclopent-1-enyl)-1 H-benzo[d]imidazol-2 (3 H)-one, 5i

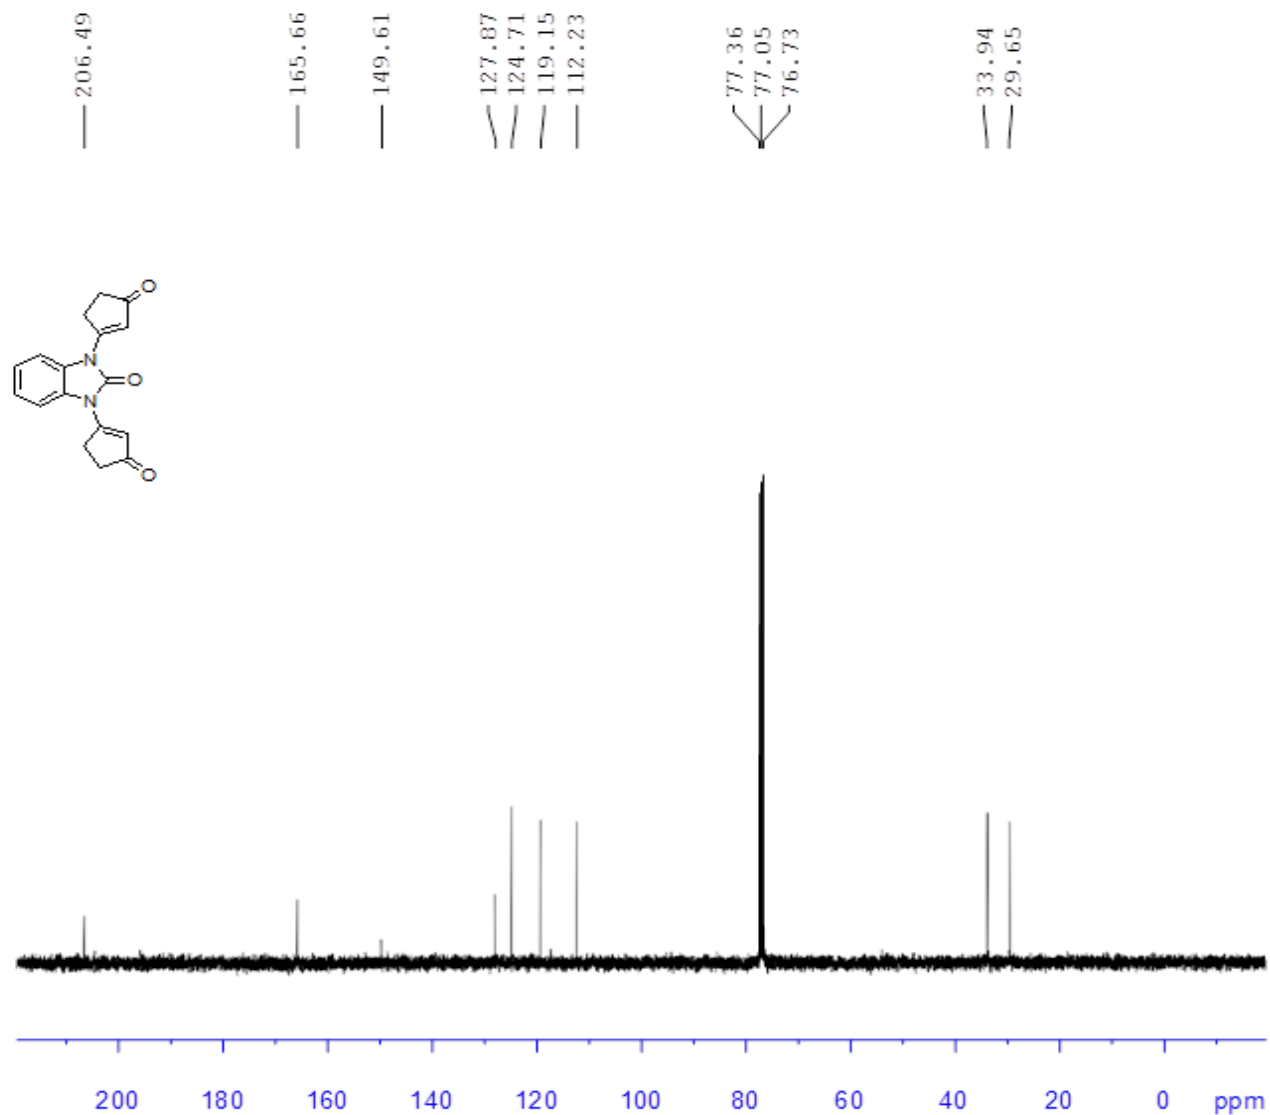

## New Journal of Chemistry

### 33. IR Spectra of 1, 3-bis (3-oxocyclopent-1-enyl)-1 H-benzo[d]imidazol-2 (3 H)-one, 5i

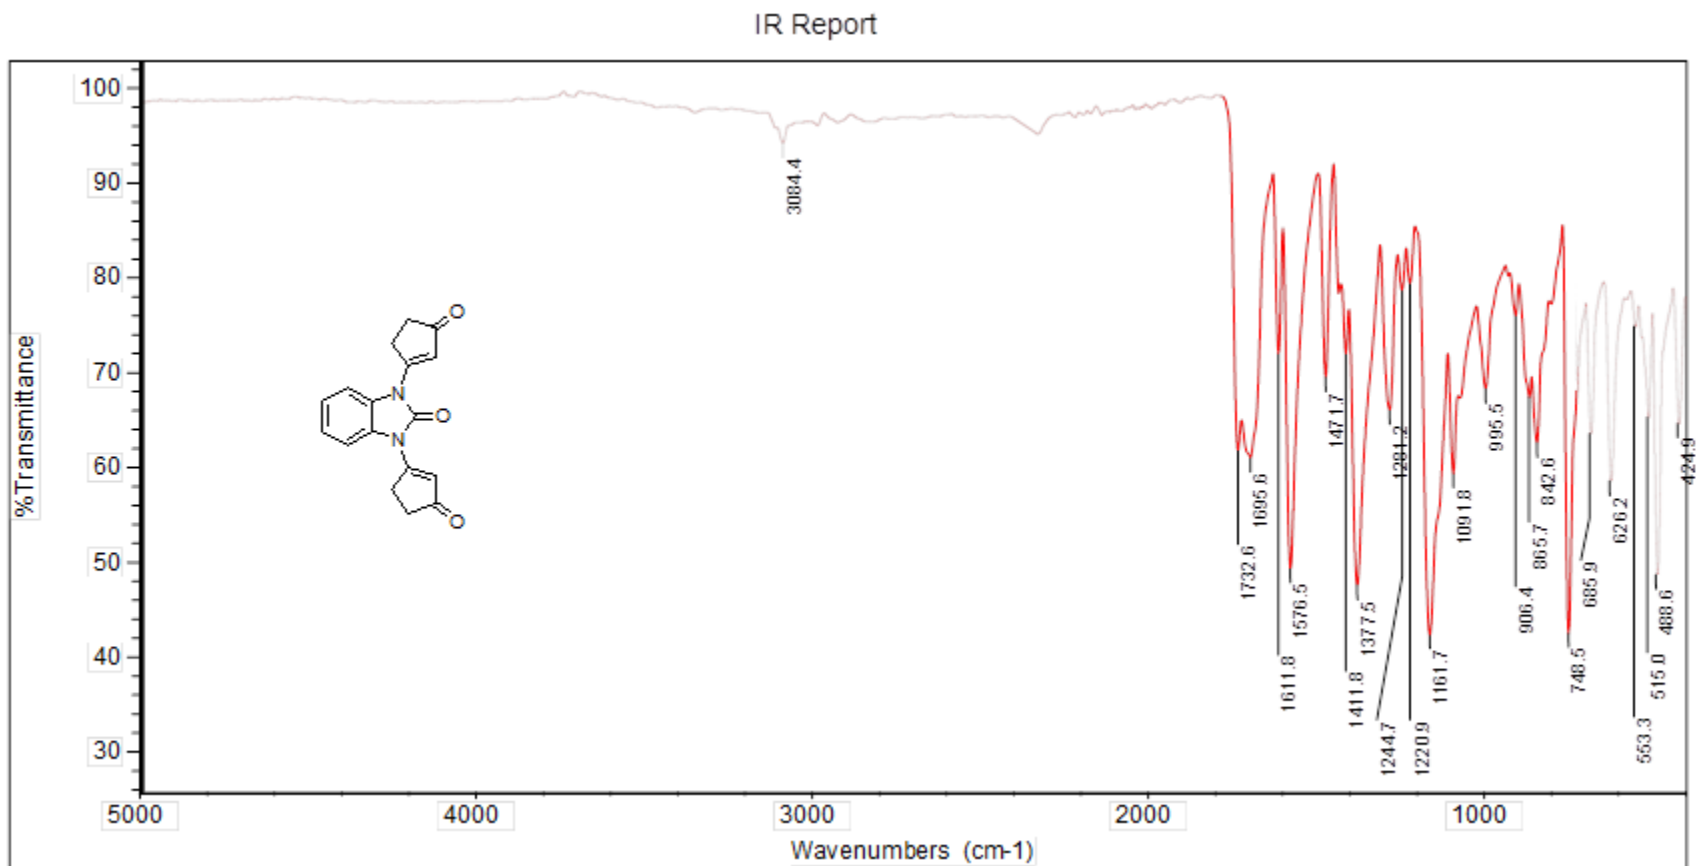

## New Journal of Chemistry

### 34. LCMS Spectra of 1, 3-bis (3-oxocyclopent-1-enyl)-1 H-benzo[d]imidazol-2 (3 H)-one, 5i

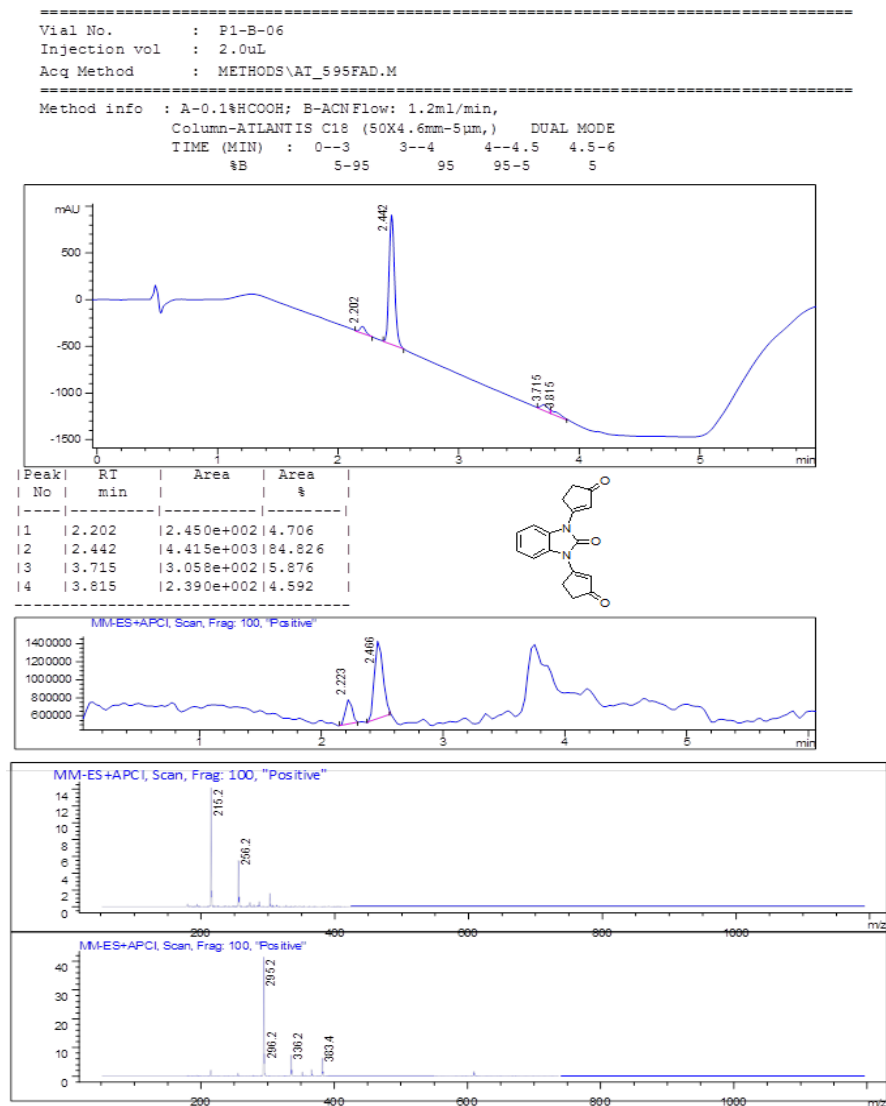

## New Journal of Chemistry

### 35. <sup>1</sup>H NMR Spectra of 3-chloro-7-(3-oxocyclopent-1-enyl)-1,7-naphthyridin-8 (7 H)-one, 5k

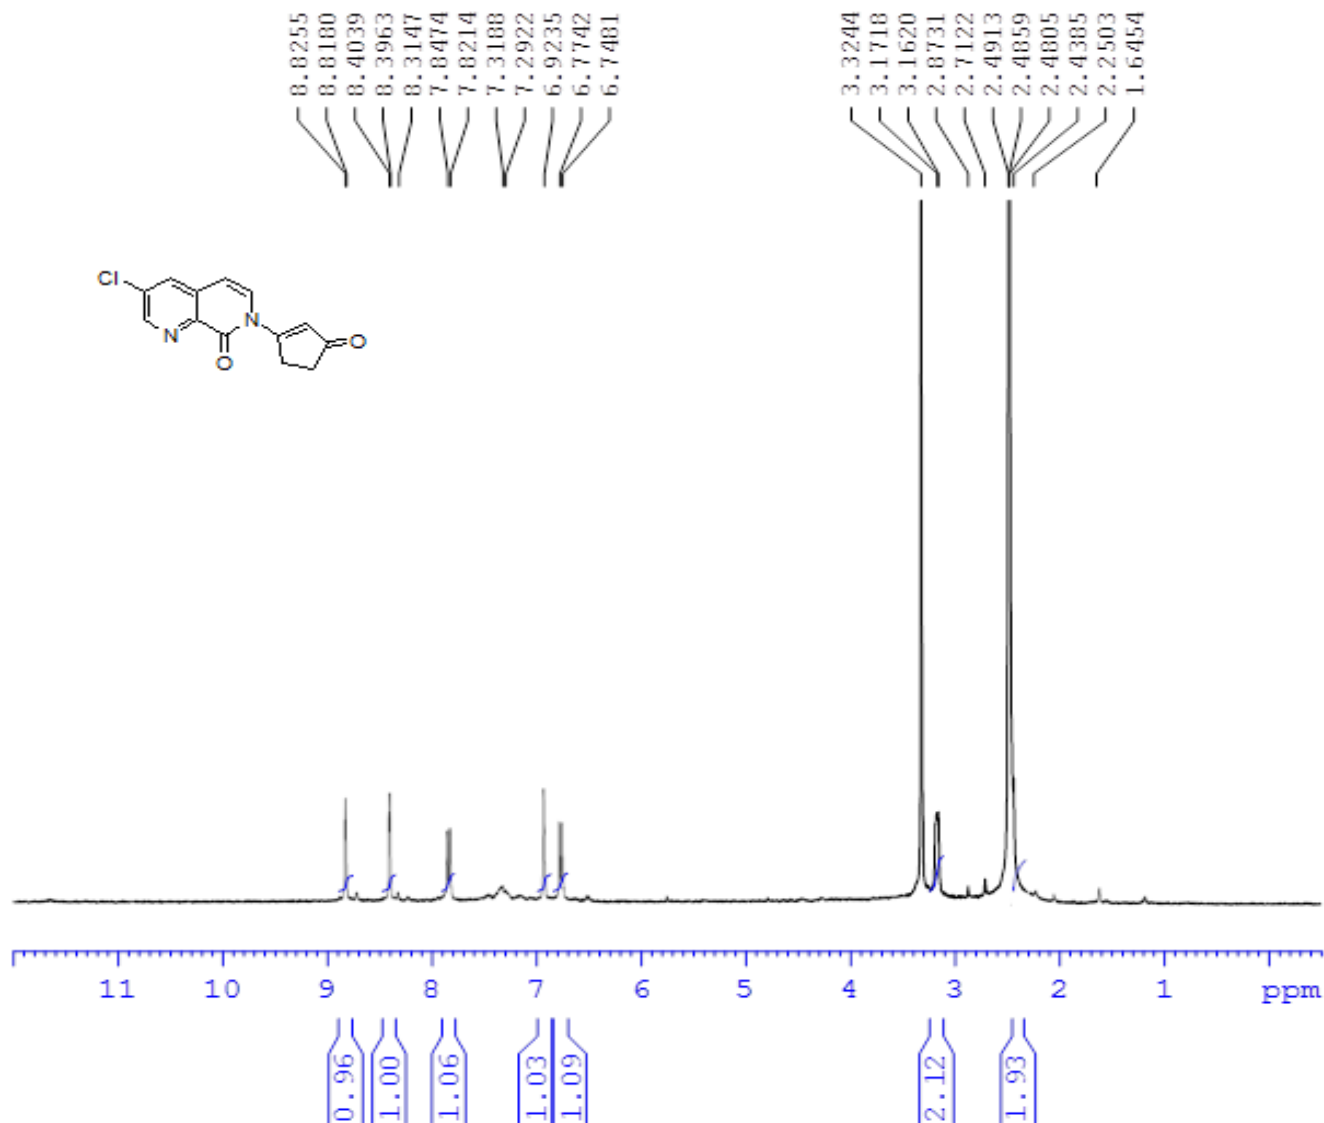

## New Journal of Chemistry

### 36. <sup>13</sup>C NMR Spectra of 3-chloro-7-(3-oxocyclopent-1-enyl)-1,7-naphthyridin-8(7H)-one, 5k

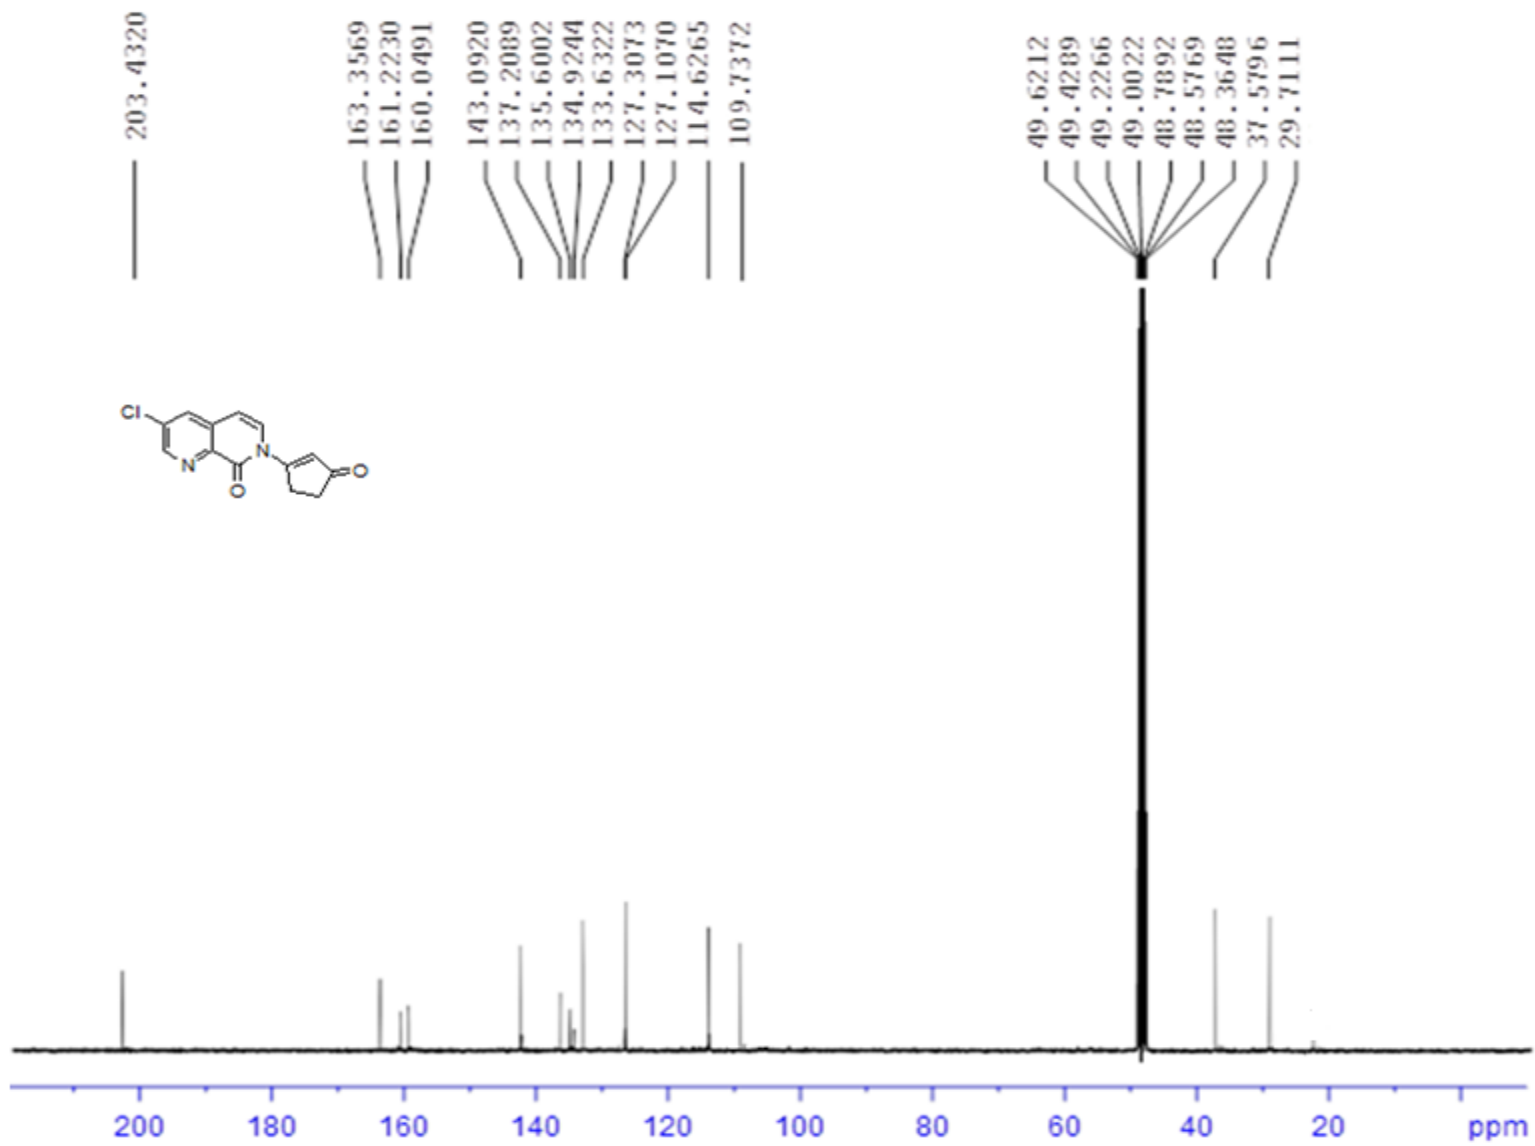



## New Journal of Chemistry

### 37. IR Spectra of 3-chloro-7-(3-oxocyclopent-1-enyl)-1, 7-naphthyridin-8 (7 H)-one, 5k

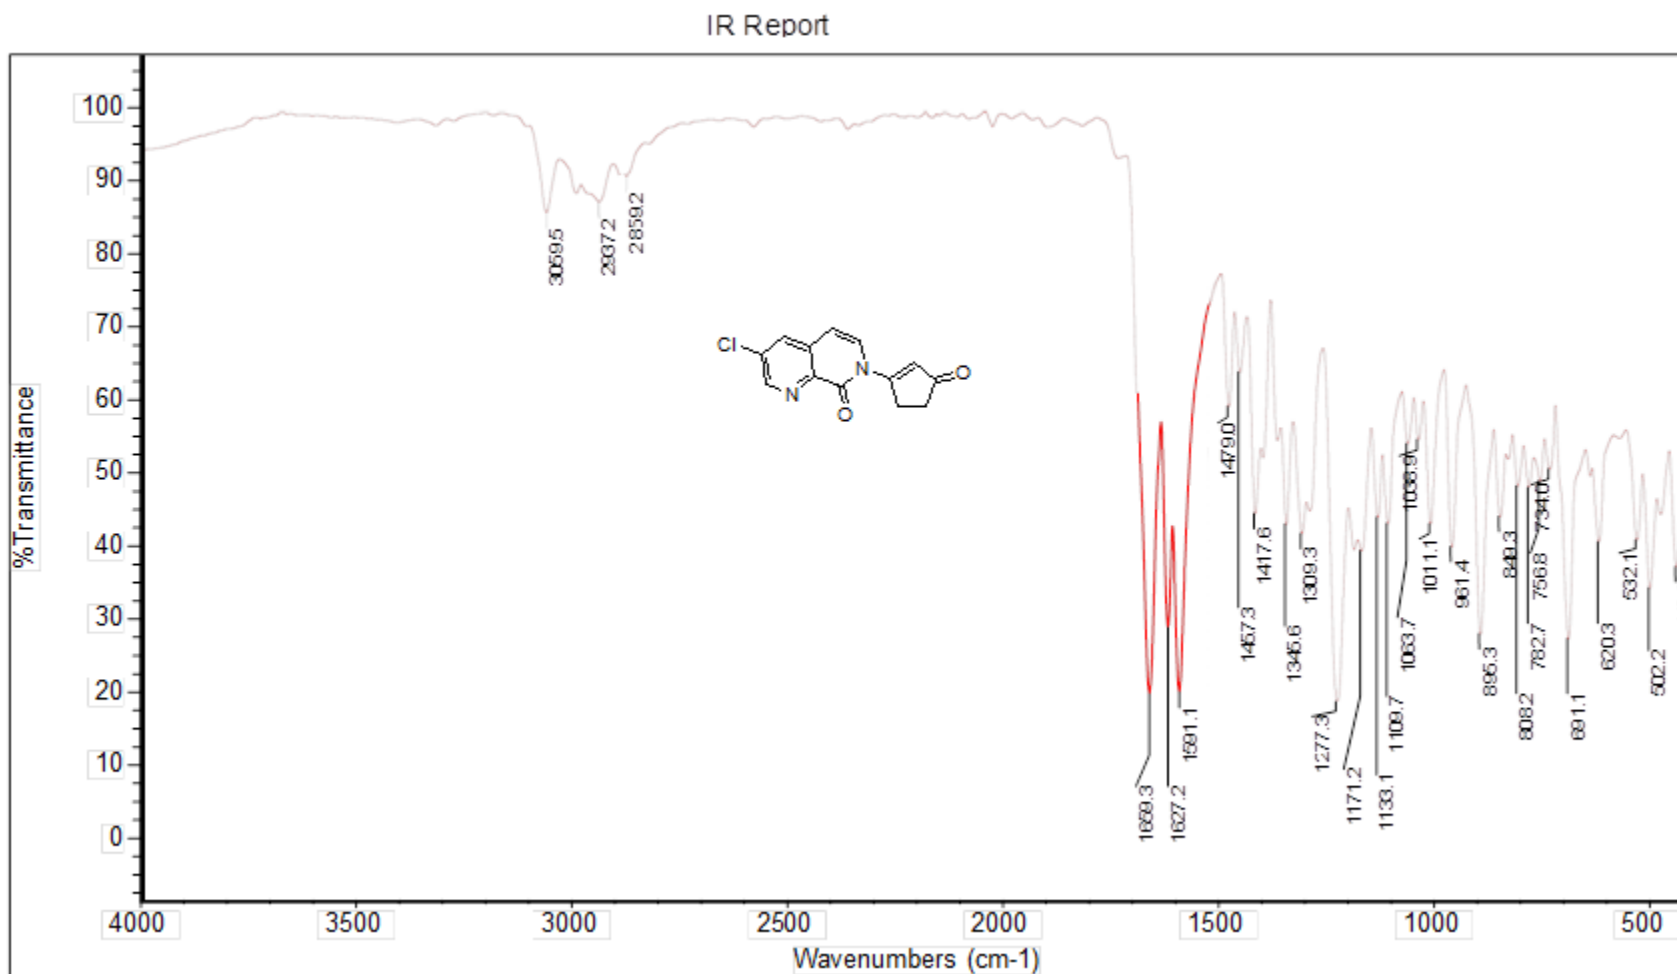

## New Journal of Chemistry

### 38. LCMS Spectra of 3-chloro-7-(3-oxocyclopent-1-enyl)-1,7-naphthyridin-8(7H)-one, 5k

=====  
Injection vol : 2.0uL  
Acq Method : METHODS\AT\_595FAD.M  
=====  
Method info : A-0.1%HCOOH; B-ACNFlow: 1.2ml/min,  
Column-ATLANTIS C18 (50X4.6mm-5um,) DUAL MODE  
TIME (MIN) : 0--3 3--4 4--4.5 4.5--6  
%B 5-95 95 95-5 5

| Peak No | RT min | Area       | Area % |
|---------|--------|------------|--------|
| 1       | 1.959  | 2.988e+002 | 4.551  |
| 2       | 2.199  | 6.644e+001 | 1.012  |
| 3       | 2.251  | 5.384e+003 | 82.010 |
| 4       | 2.340  | 1.708e+002 | 2.601  |
| 5       | 2.459  | 1.164e+002 | 1.773  |
| 6       | 3.646  | 5.287e+002 | 8.054  |

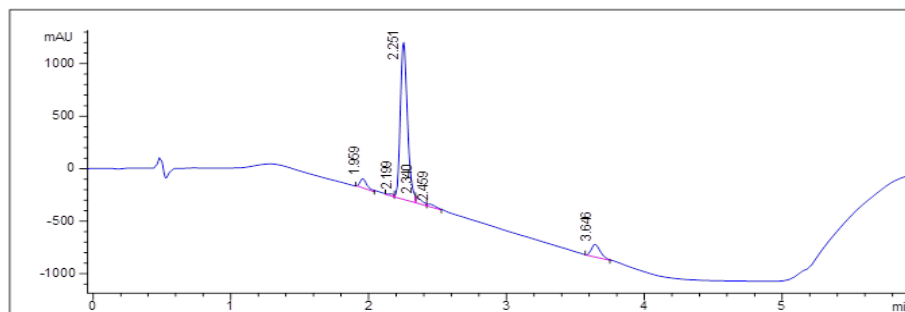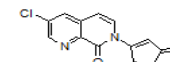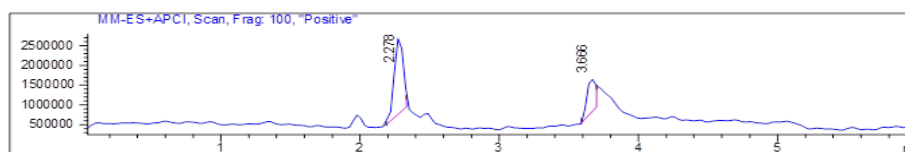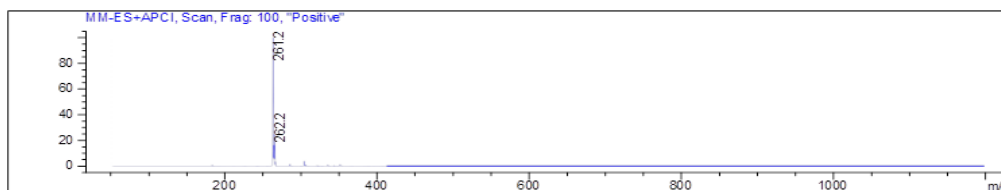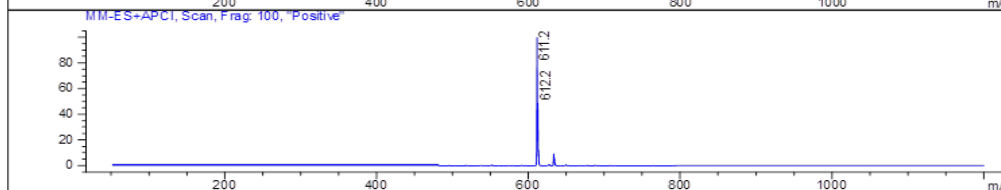

## New Journal of Chemistry

### 39. <sup>1</sup>H NMR Spectra of 1-(3-oxocyclohex-1-enyl) pyridin-2 (1 H)-one, 5m

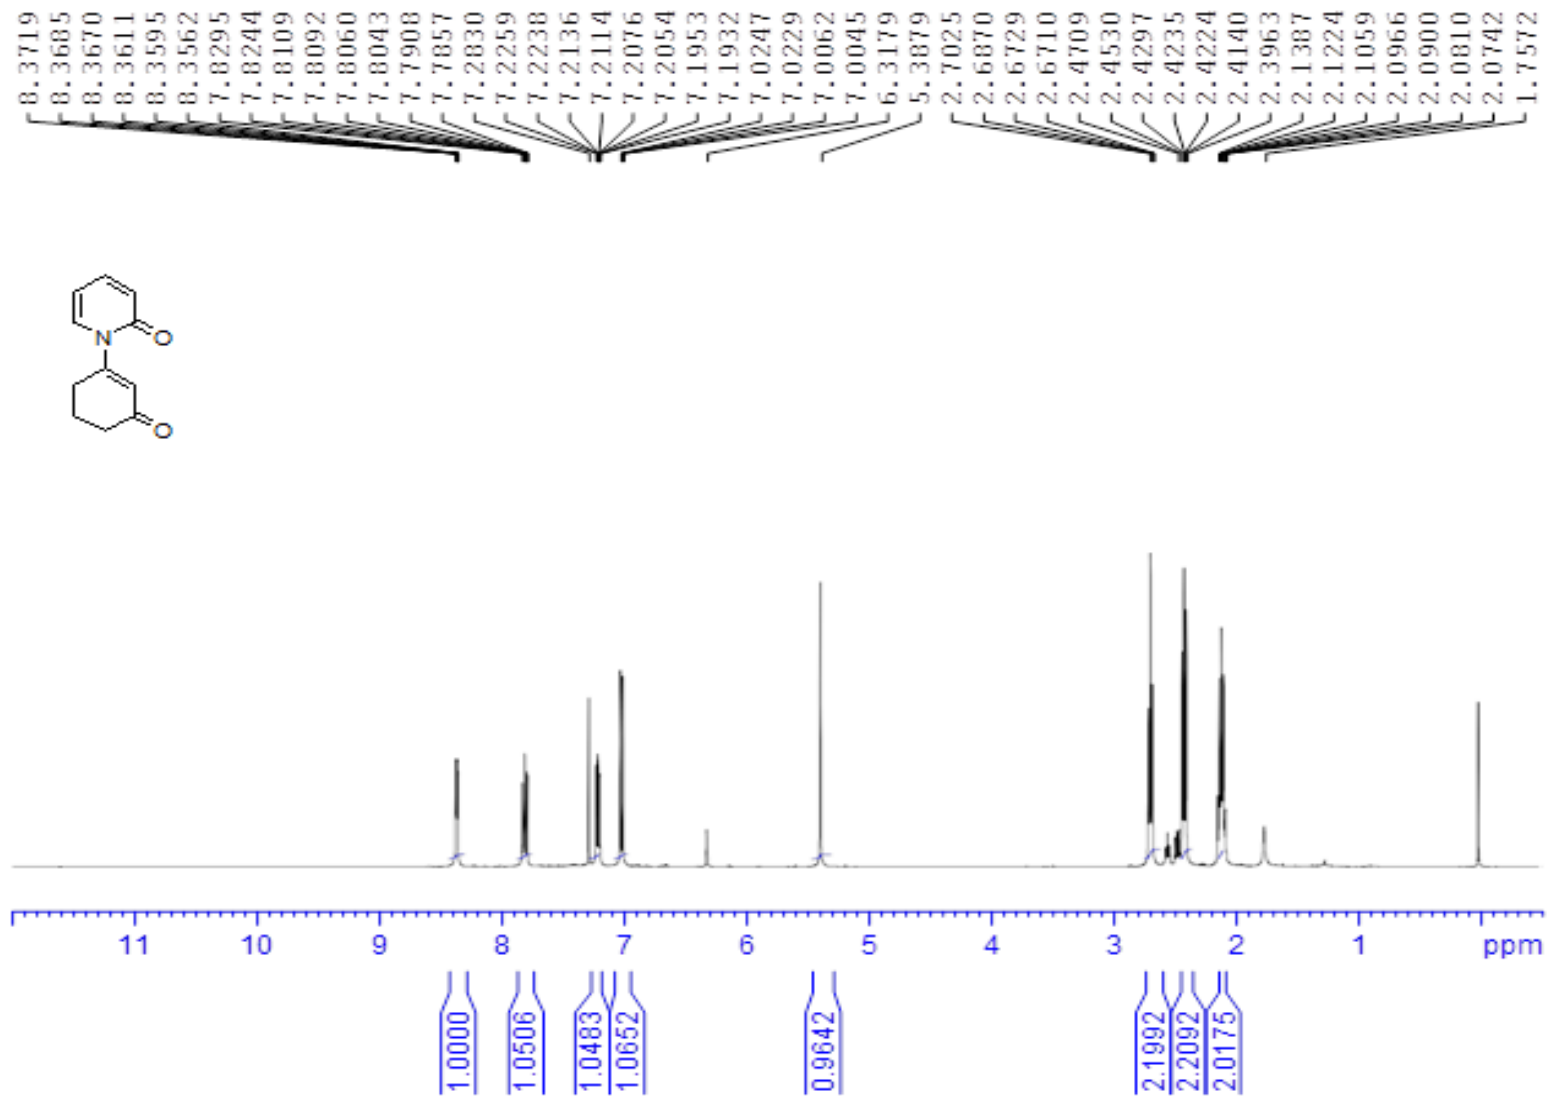

## New Journal of Chemistry

### 40. <sup>13</sup>C NMR Spectra of 1-(3-oxocyclohex-1-enyl) pyridin-2 (1 H)-one, 5m

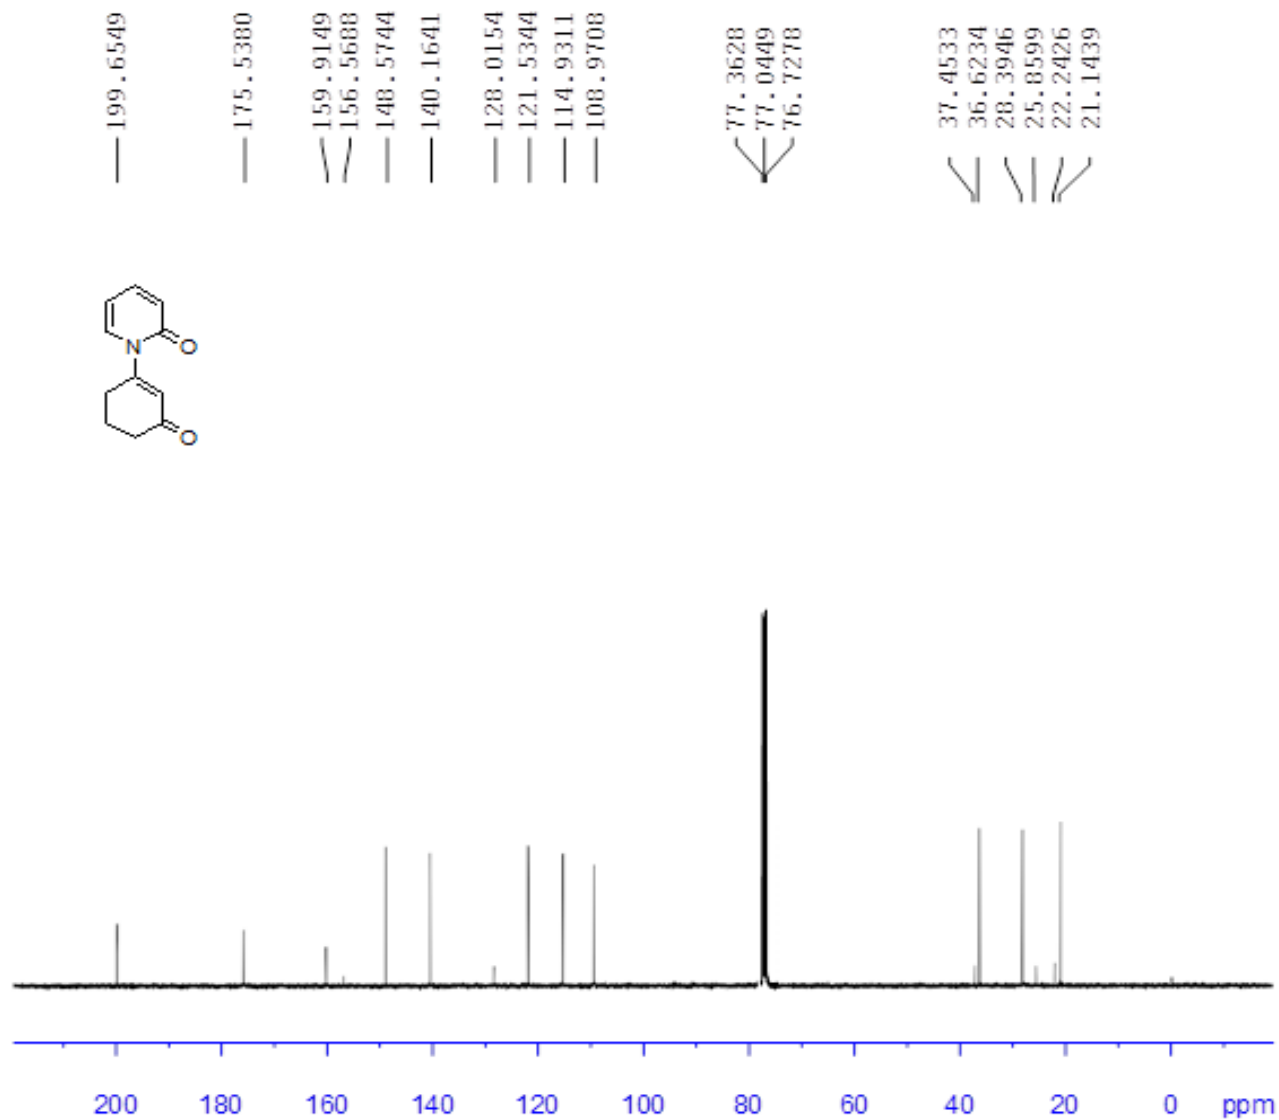

## New Journal of Chemistry

### 41. IR Spectra of 1-(3-oxocyclohex-1-enyl) pyridin-2 (1 H)-one, 5m

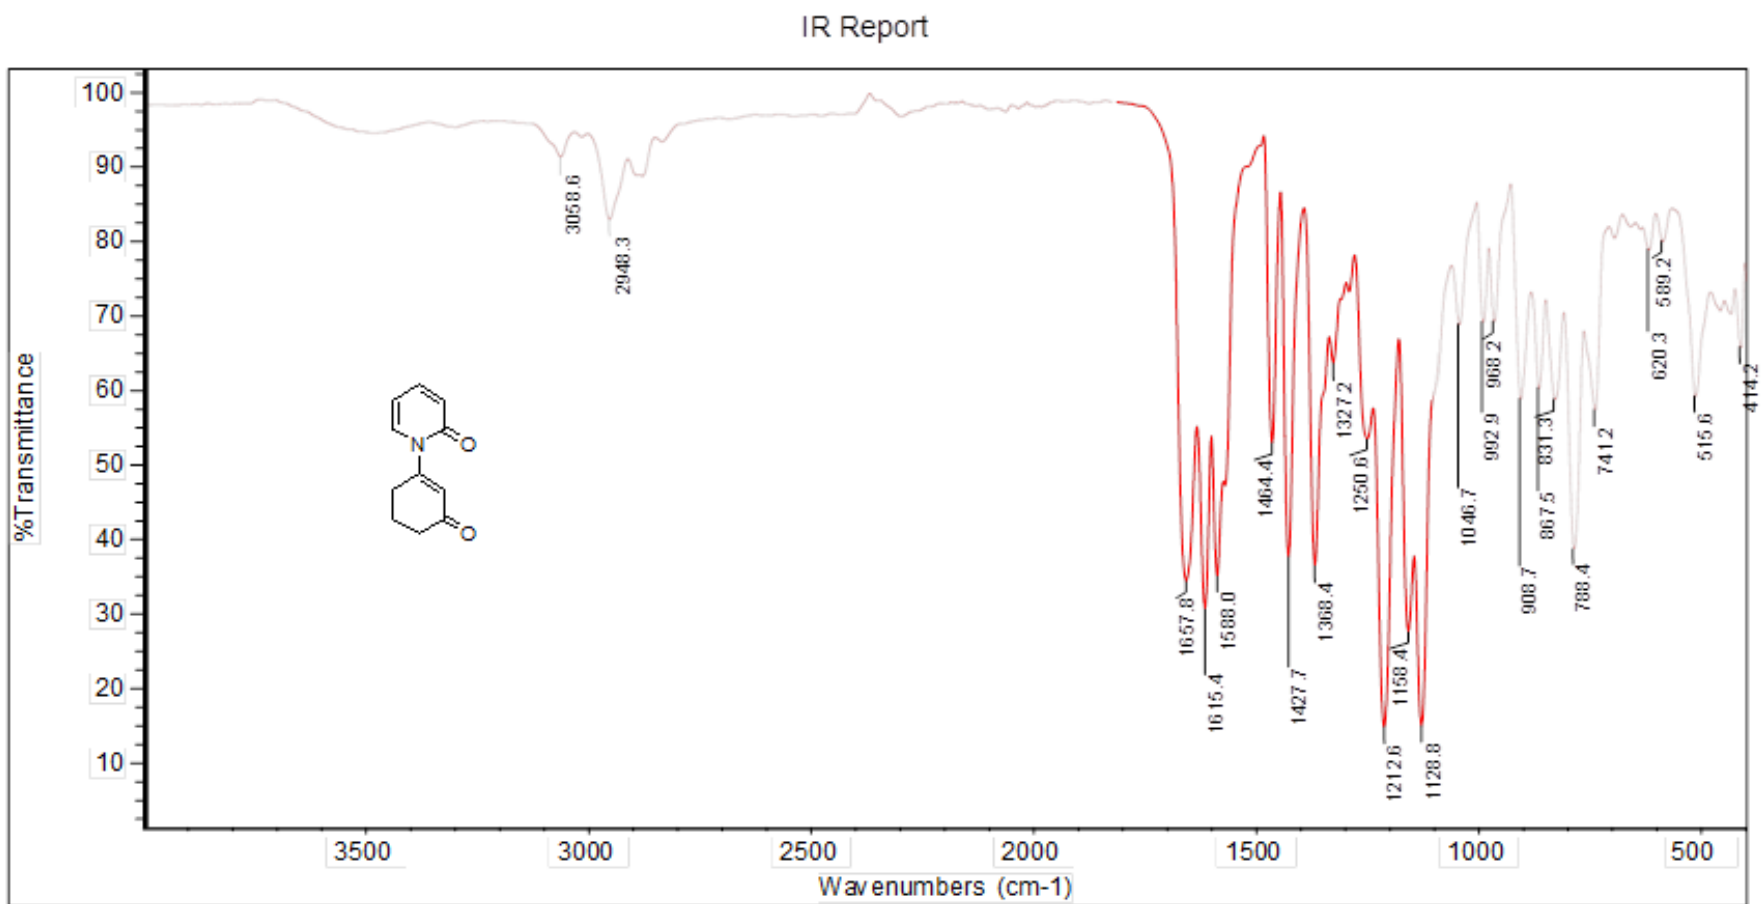

## New Journal of Chemistry

### 42. LCMS Spectra of 1-(3-oxocyclohex-1-enyl) pyridin-2 (1 H)-one, 5m

=====  
Injection vol : 2.0uL  
Acq Method : METHODS\AT\_595FAD.M  
=====  
Method info : A-0.1%HCOOH; B-ACNFlow: 1.2ml/min,  
Column-ATLANTIS C18 (50X4.6mm-5µm) DUAL MODE  
TIME (MIN) : 0--3 3--4 4--4.5 4.5--6  
%B 5-95 95 95-5 5  
=====

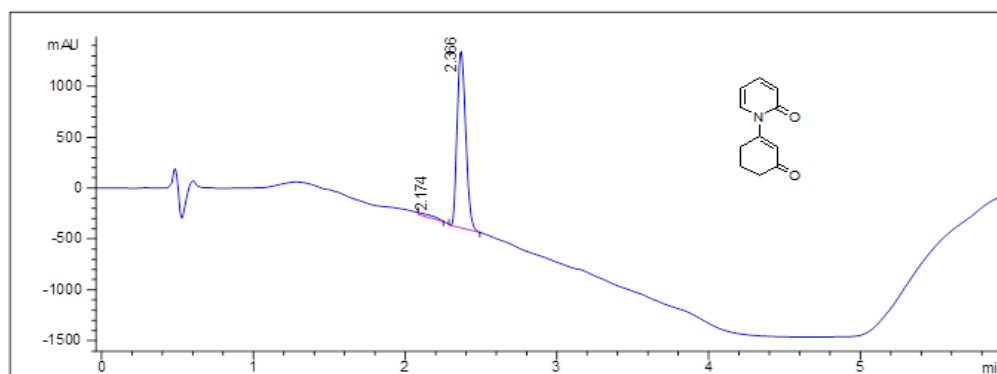

| Peak No | RT min | Area       | Area % |
|---------|--------|------------|--------|
| 1       | 2.174  | 2.081e+002 | 2.960  |
| 2       | 2.366  | 6.822e+003 | 97.040 |

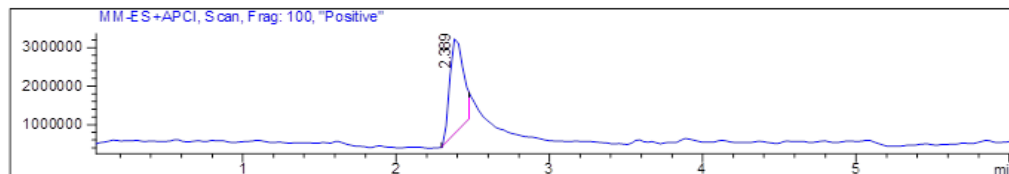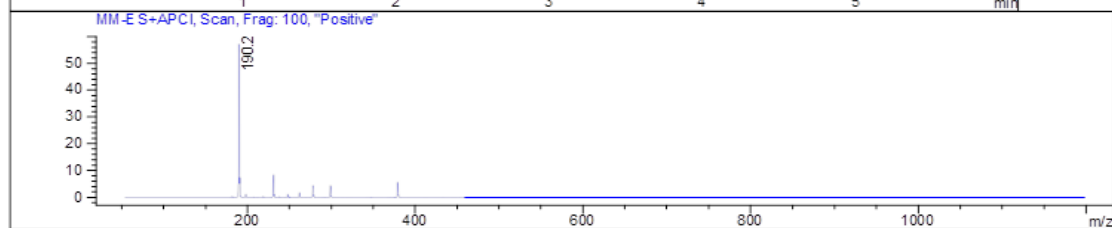

## New Journal of Chemistry

### 43. <sup>1</sup>H NMR Spectra of 5-methyl-1-(3-oxocyclohex-1-enyl) pyridin-2 (1 H)-one, 5o

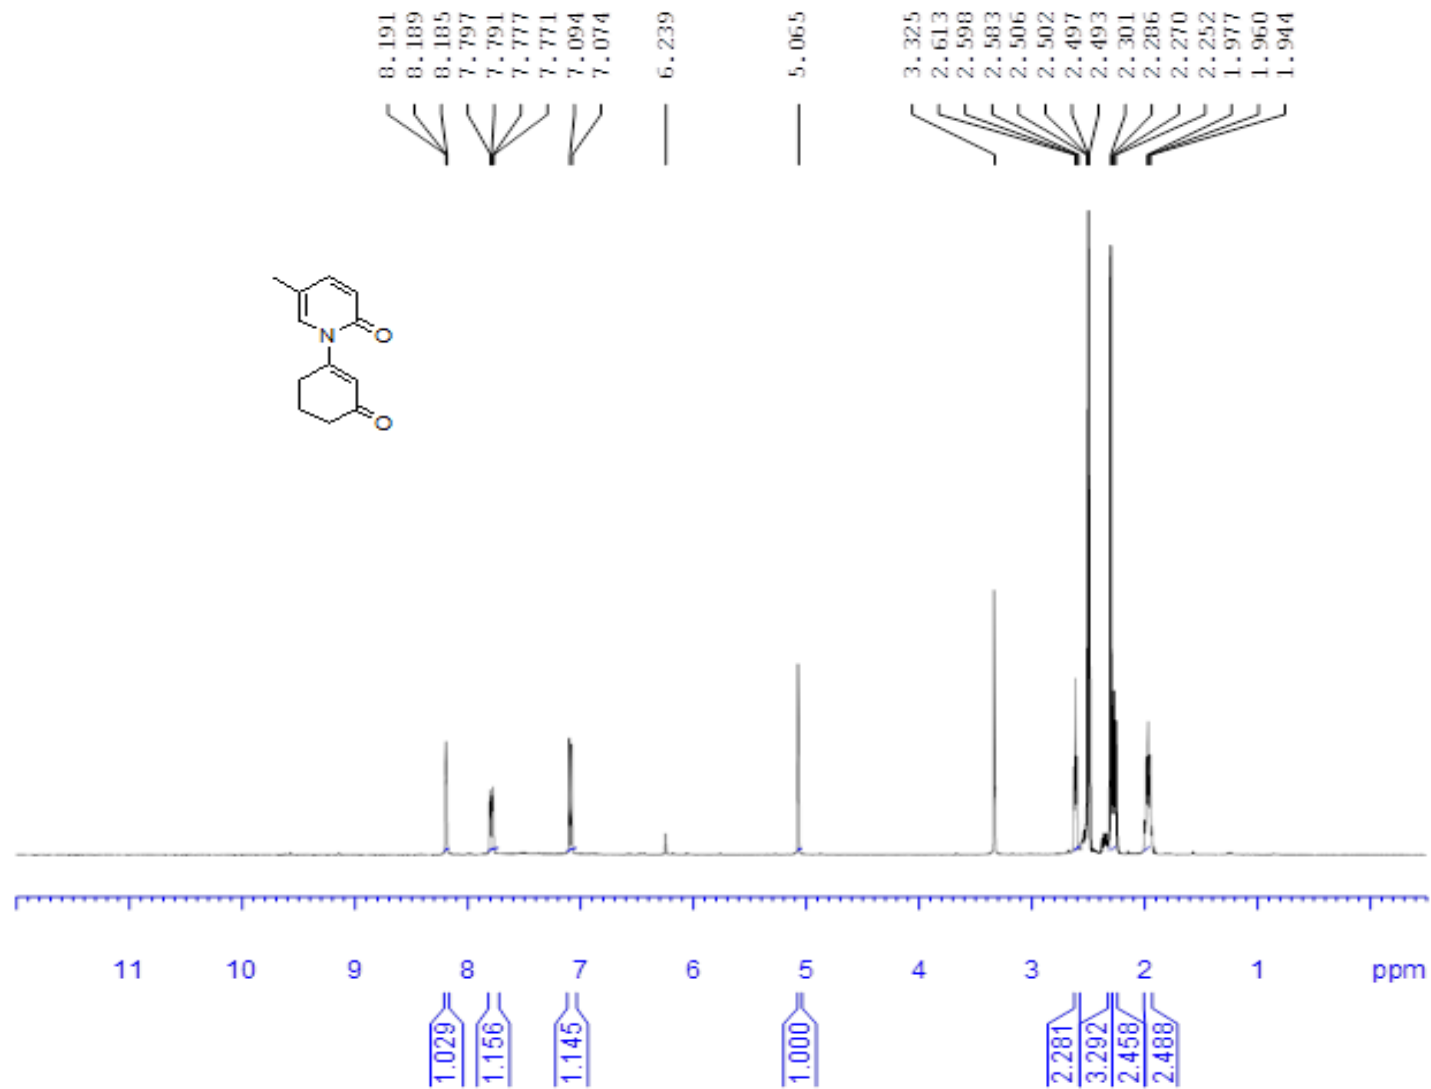

## New Journal of Chemistry

### 44. <sup>13</sup>C NMR Spectra of 5-methyl-1-(3-oxocyclohex-1-enyl) pyridin-2 (1 H)-one, 5o

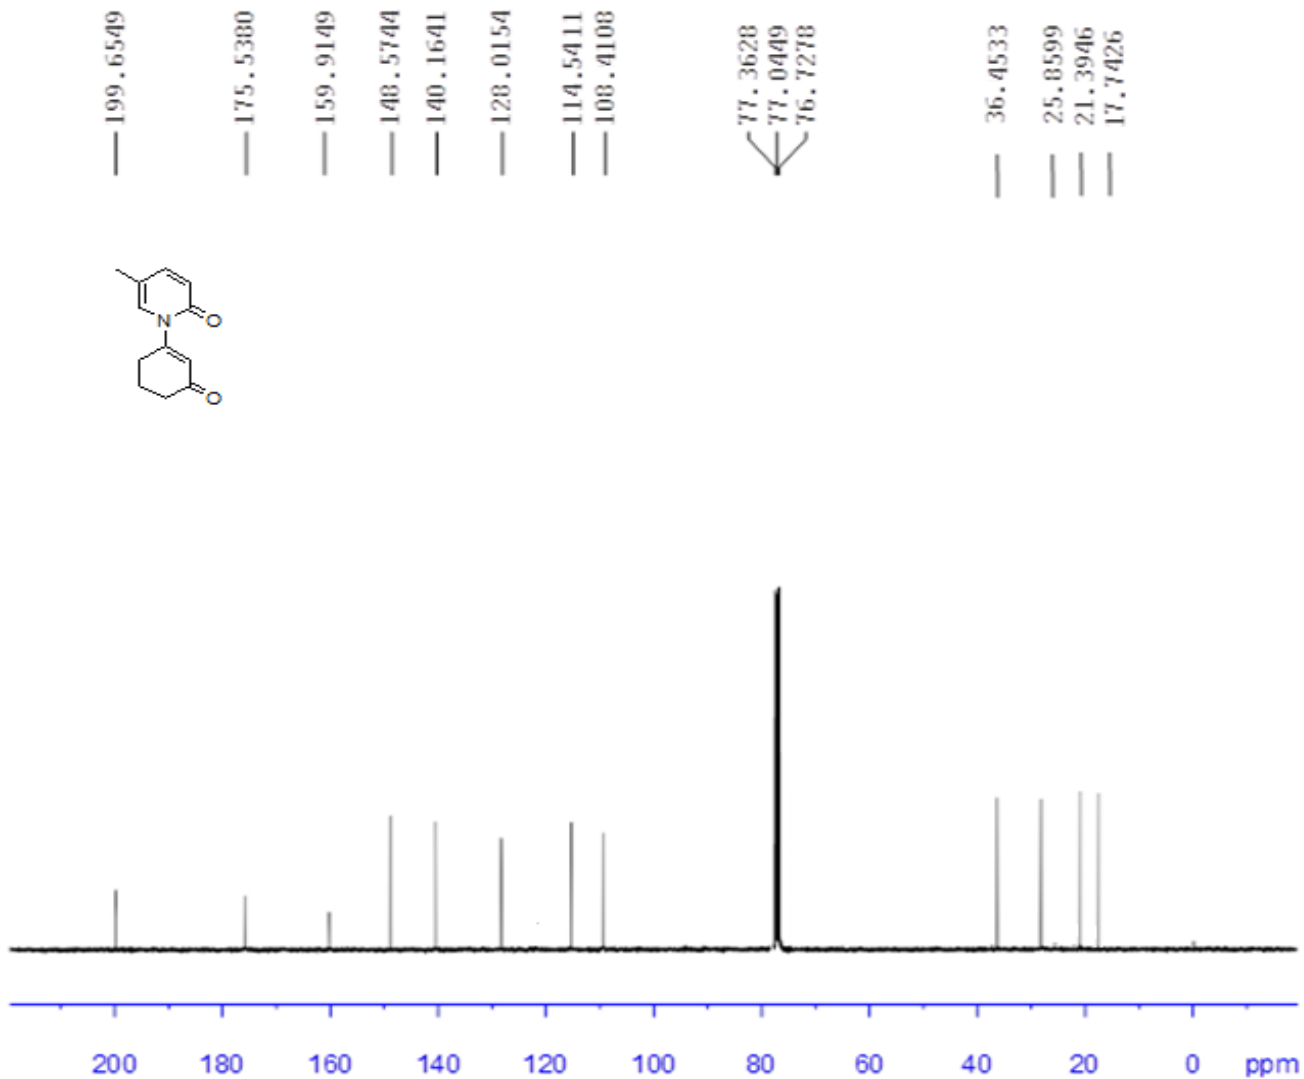



## New Journal of Chemistry

### 45. LCMS Spectra of 5-methyl-1-(3-oxocyclohex-1-enyl) pyridin-2 (1 H)-one, 5o

Injection vol : 2.0uL  
Acq Method : METHODS\AT\_595FAD.M

Method info :A-0.1%HCOOH;B-ACN Flow: 1.5ml/min,  
Column-ATLANTIS dc18 (50X4.6mm-5µm, ) DUAL MODE  
TIME (MIN) : 0--3 3--4 4--4.5 4.5--6  
%B 5-95 95 95-5 5

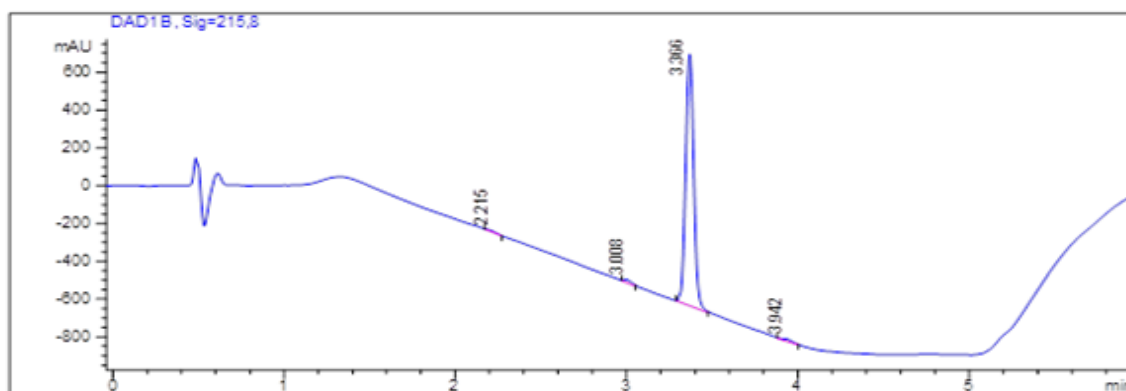

| Peak No | RT min | Area       | Area % |
|---------|--------|------------|--------|
| 1       | 2.215  | 2.631e+001 | 0.586  |
| 2       | 3.008  | 6.315e+001 | 1.405  |
| 3       | 3.366  | 4.350e+003 | 96.809 |
| 4       | 3.942  | 5.392e+001 | 1.200  |

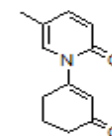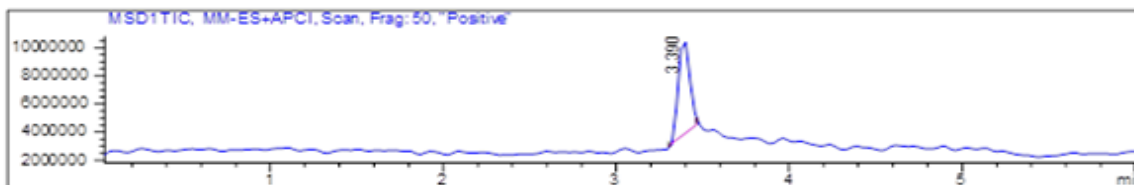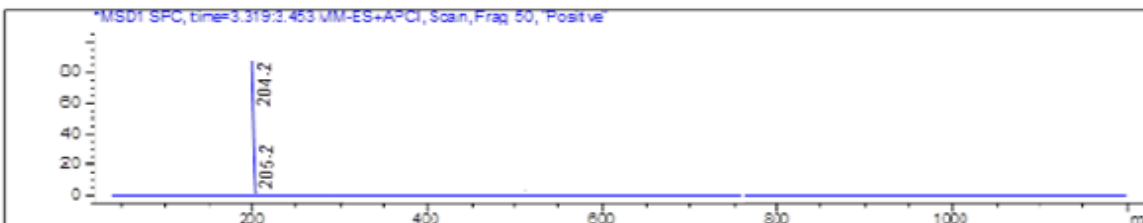

New Journal of Chemistry

46. <sup>1</sup>H NMR Spectra of 4-(trifluoromethyl)-1-(3-oxocyclohex-1-enyl) pyridin-2 (1 H)-one, 5p

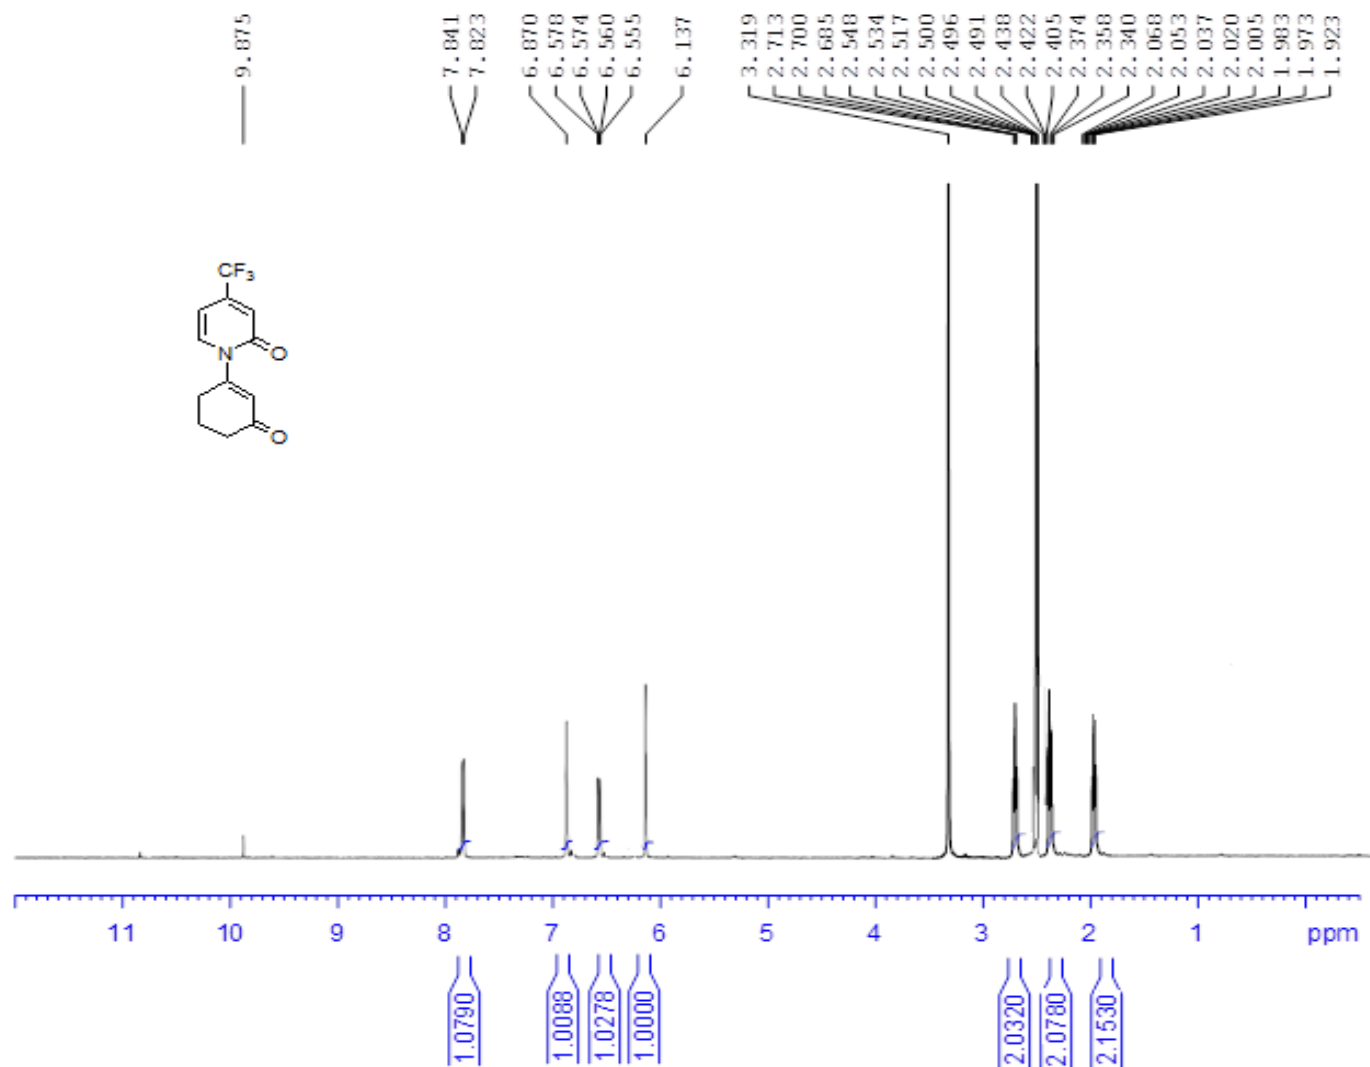

## New Journal of Chemistry

### 47. LCMS Spectra of 4-(trifluoromethyl)-1-(3-oxocyclohex-1-enyl) pyridin-2 (1 H)-one, 5p

Vial No. : P2-A-04  
Acq Method : METHODS\AT\_595FAD.M  
Injection vol : 2.0ul

Method info : A-0.1%HCOOH; B-ACN Flow: 1.5ml/min,  
Column-ATLANTIS C18 (50X4.6mm-5µm,) DUAL MODE  
TIME (MIN) : 0--3 3--4 4--4.5 4.5--6  
%B 5-95 95 95-5 5

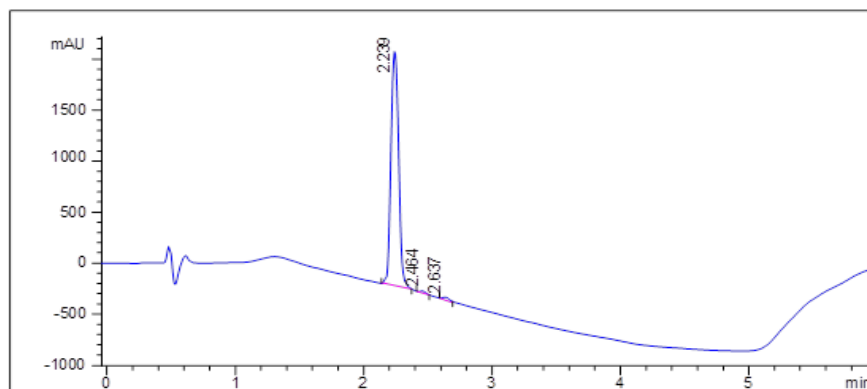

| Peak No | RT min | Area    | Area % |
|---------|--------|---------|--------|
| 1       | 2.24   | 9481.13 | 97.97  |
| 2       | 2.46   | 74.99   | 0.77   |
| 3       | 2.64   | 121.94  | 1.26   |

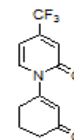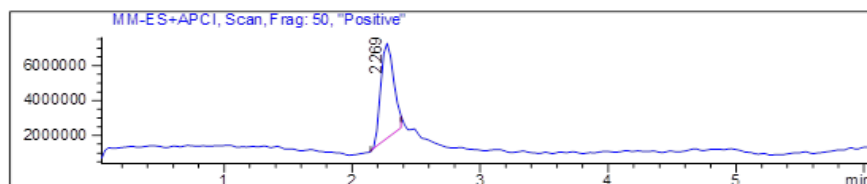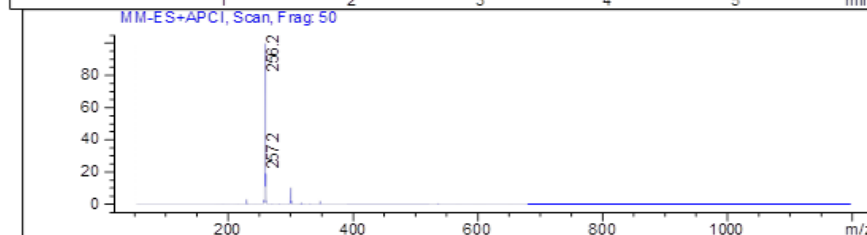

New Journal of Chemistry

48. <sup>1</sup>H NMR Spectra of 1-(3-oxocyclohex-1-enyl)-1H-benzo[d]imidazol-2(3H)-one, 5q

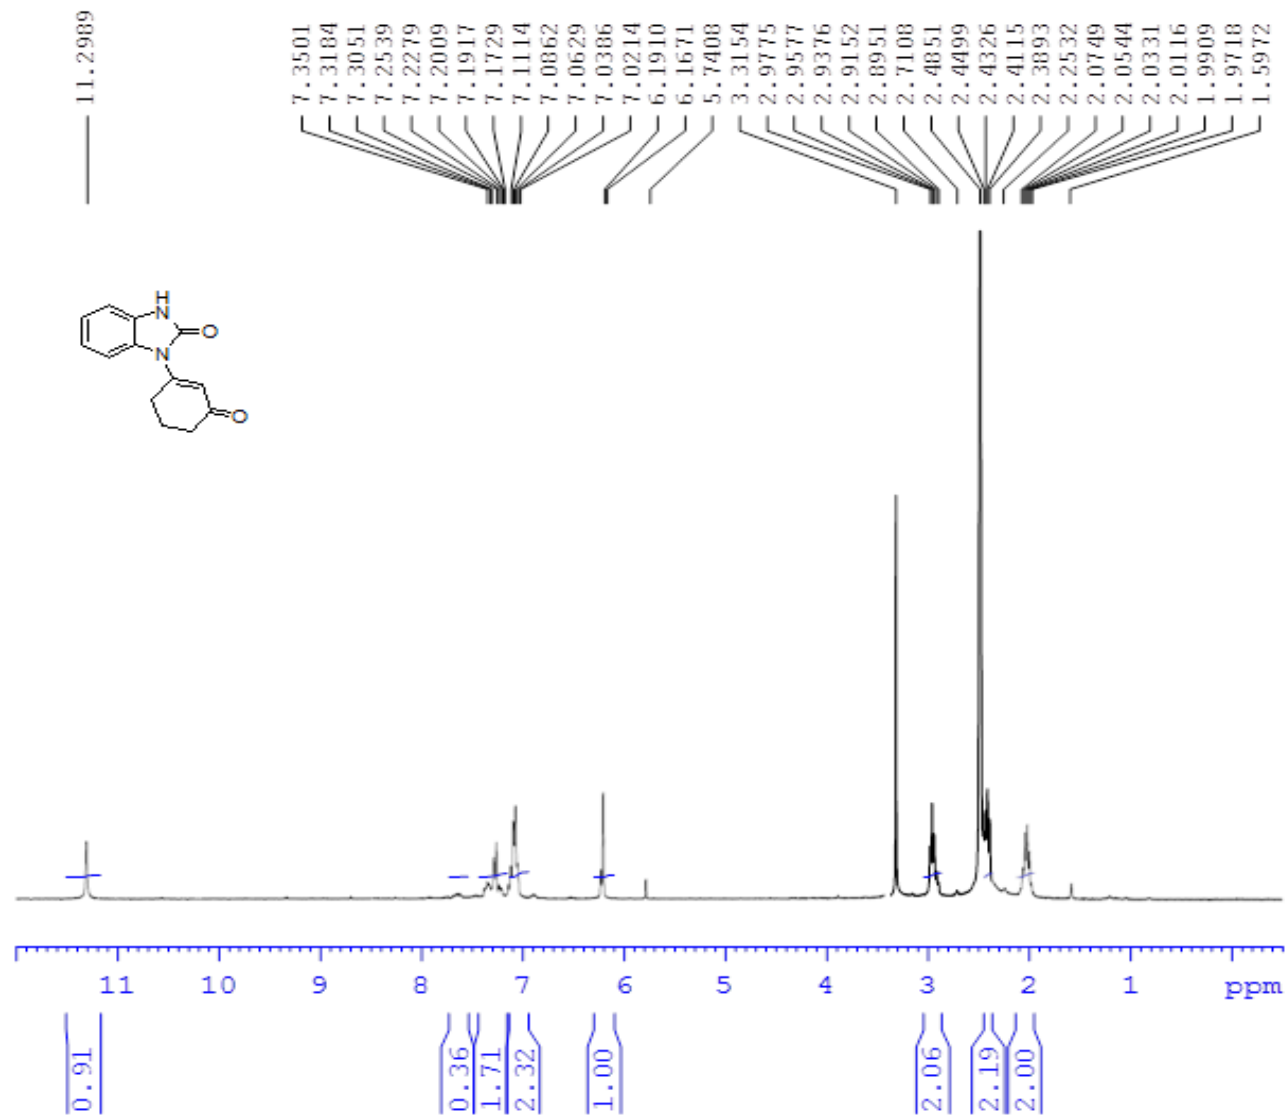

## New Journal of Chemistry

### 49. LCMS Spectra of 1-(3-oxocyclohex-1-enyl)-1 H-benzo[d]imidazol-2 (3 H)-one, 5q

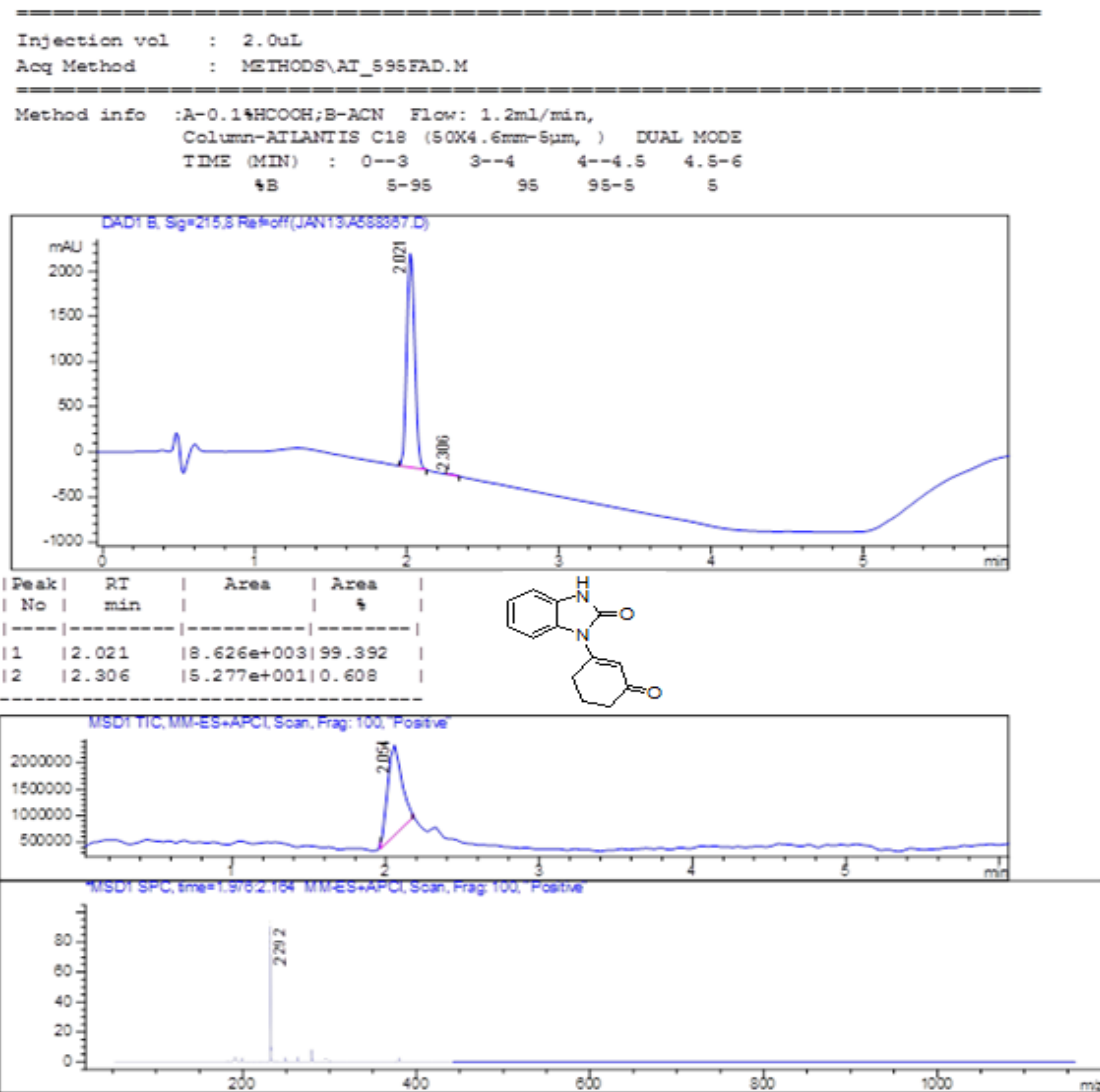

50. IR Spectra of 1-(3-oxocyclohex-1-enyl)-1 H-benzo[d]imidazol-2 (3 H)-one, 5q

IR Report

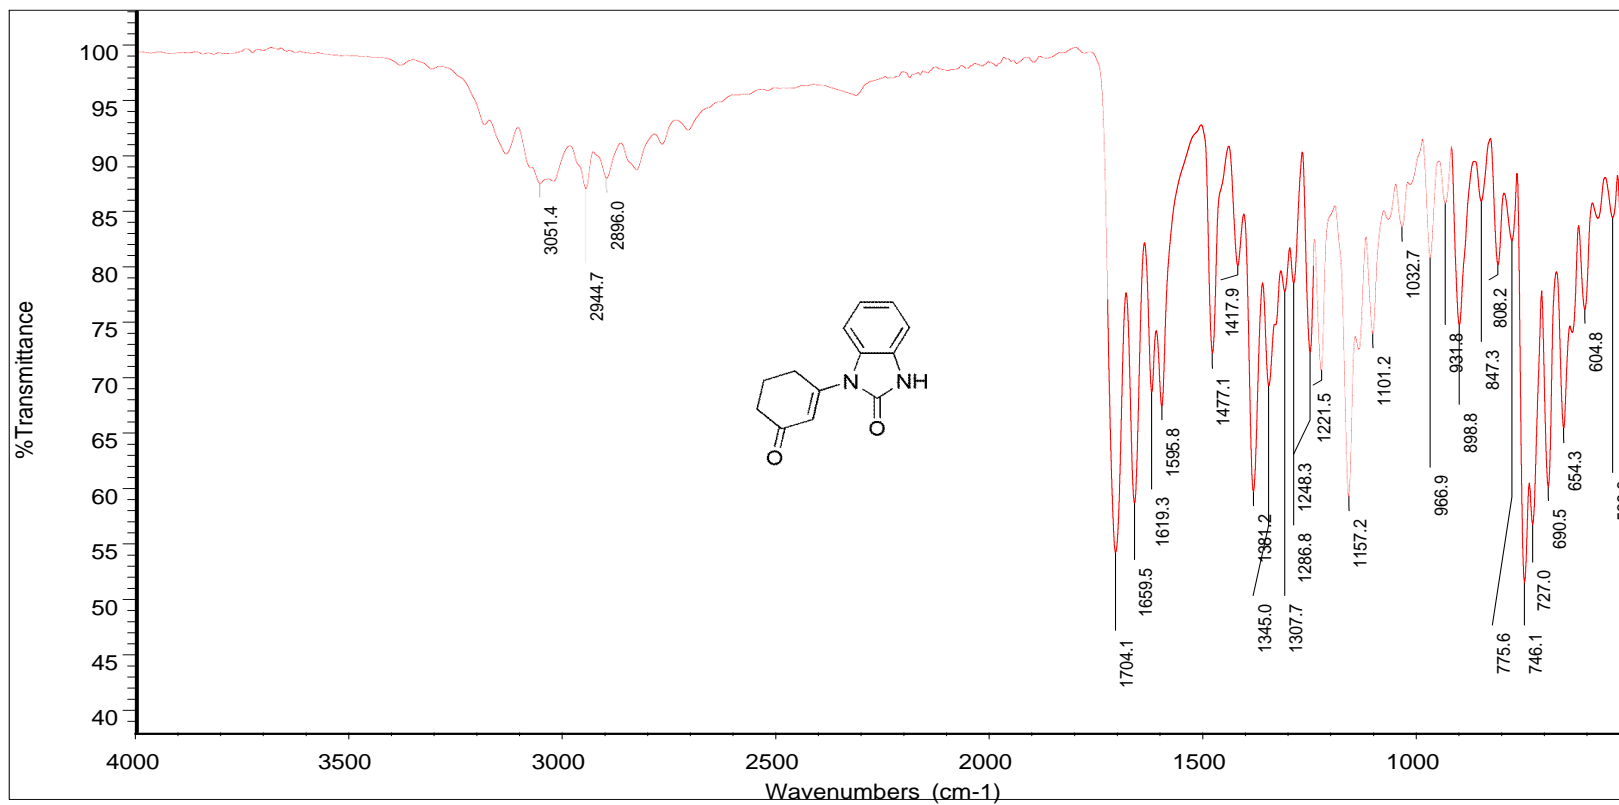

## New Journal of Chemistry

### 51. <sup>1</sup>H NMR Spectra of 3-methoxy-7-(3-oxocyclohex-1-enyl)-1,7-naphthyridin-8(7H)-one, 5s

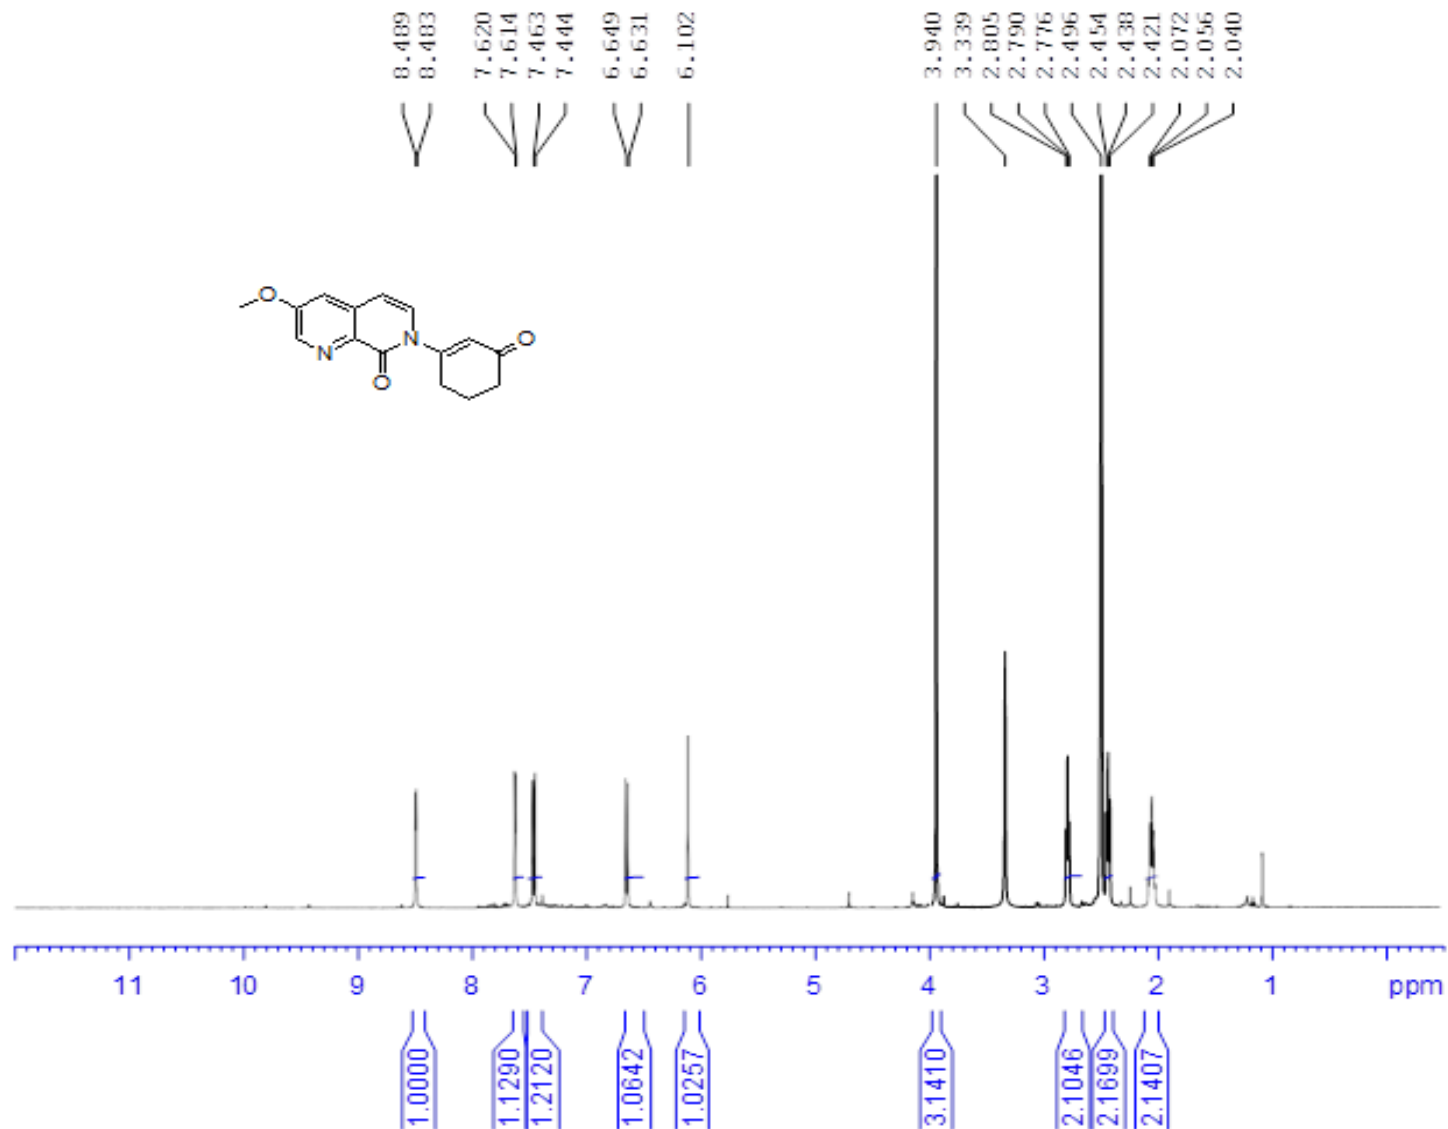

## New Journal of Chemistry

### 52. <sup>13</sup>C NMR Spectra of 3-methoxy-7-(3-oxocyclohex-1-enyl)-1,7-naphthyridin-8(7H)-one, 5s

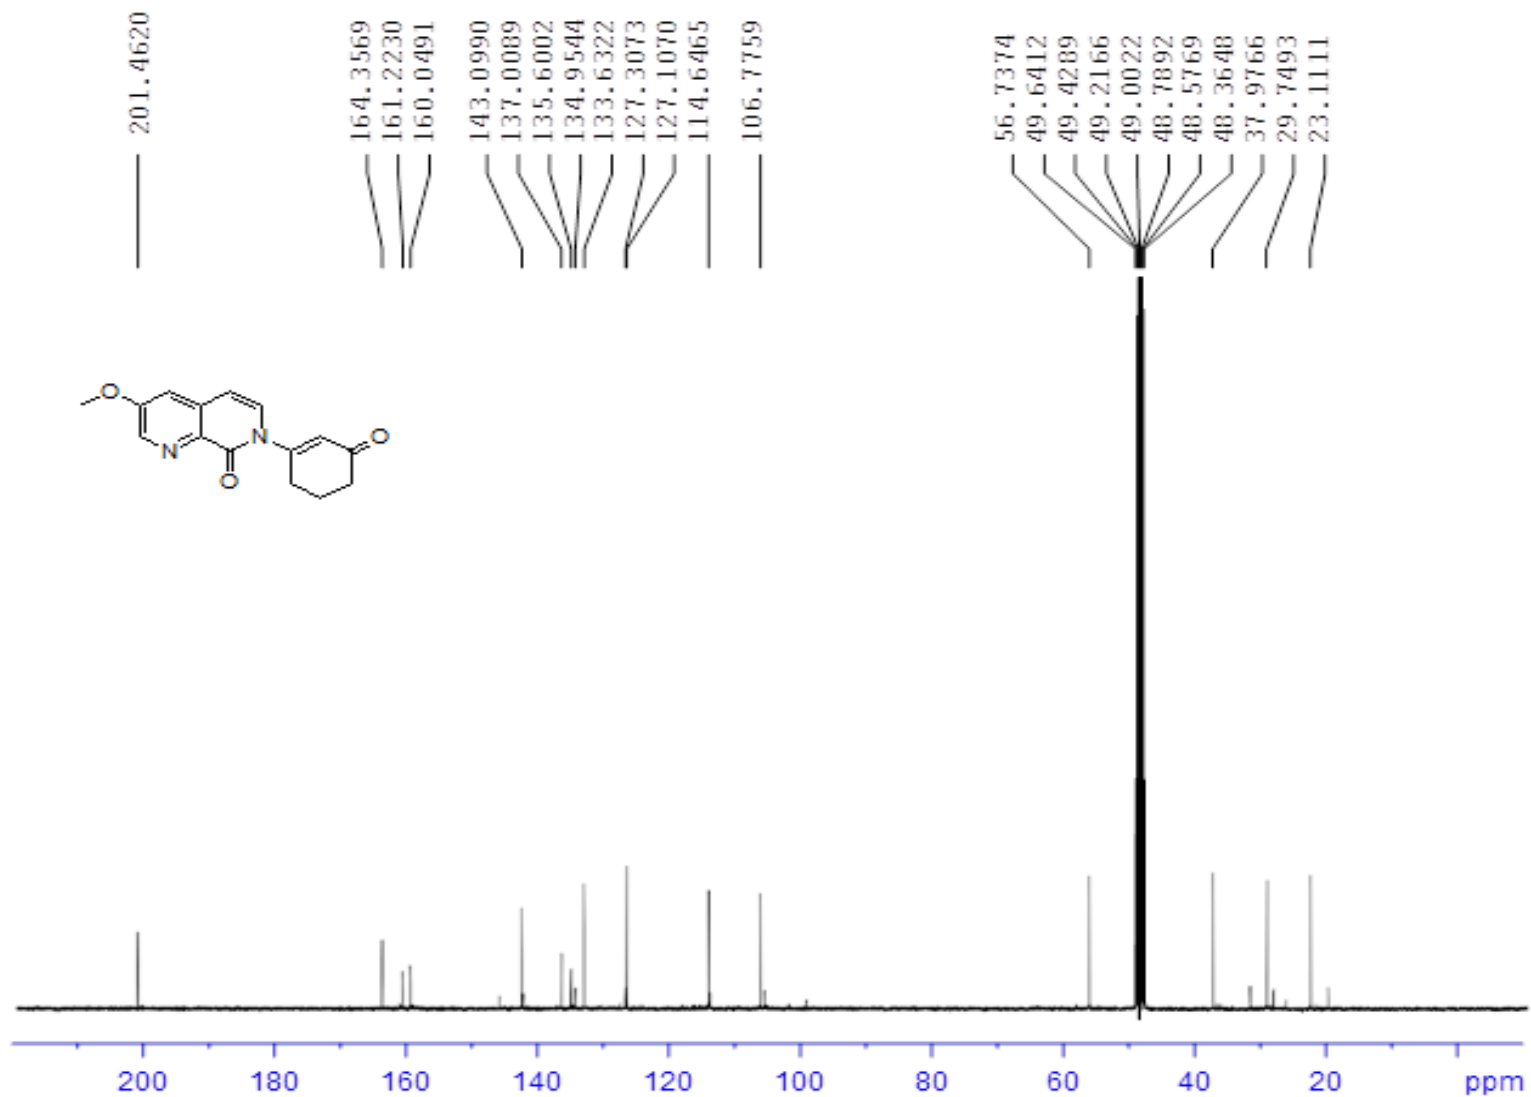



53. IR Spectra of 3-methoxy-7-(3-oxocyclohex-1-enyl)-1,7-naphthyridin-8 (7 H)-one, 5s

IR Report

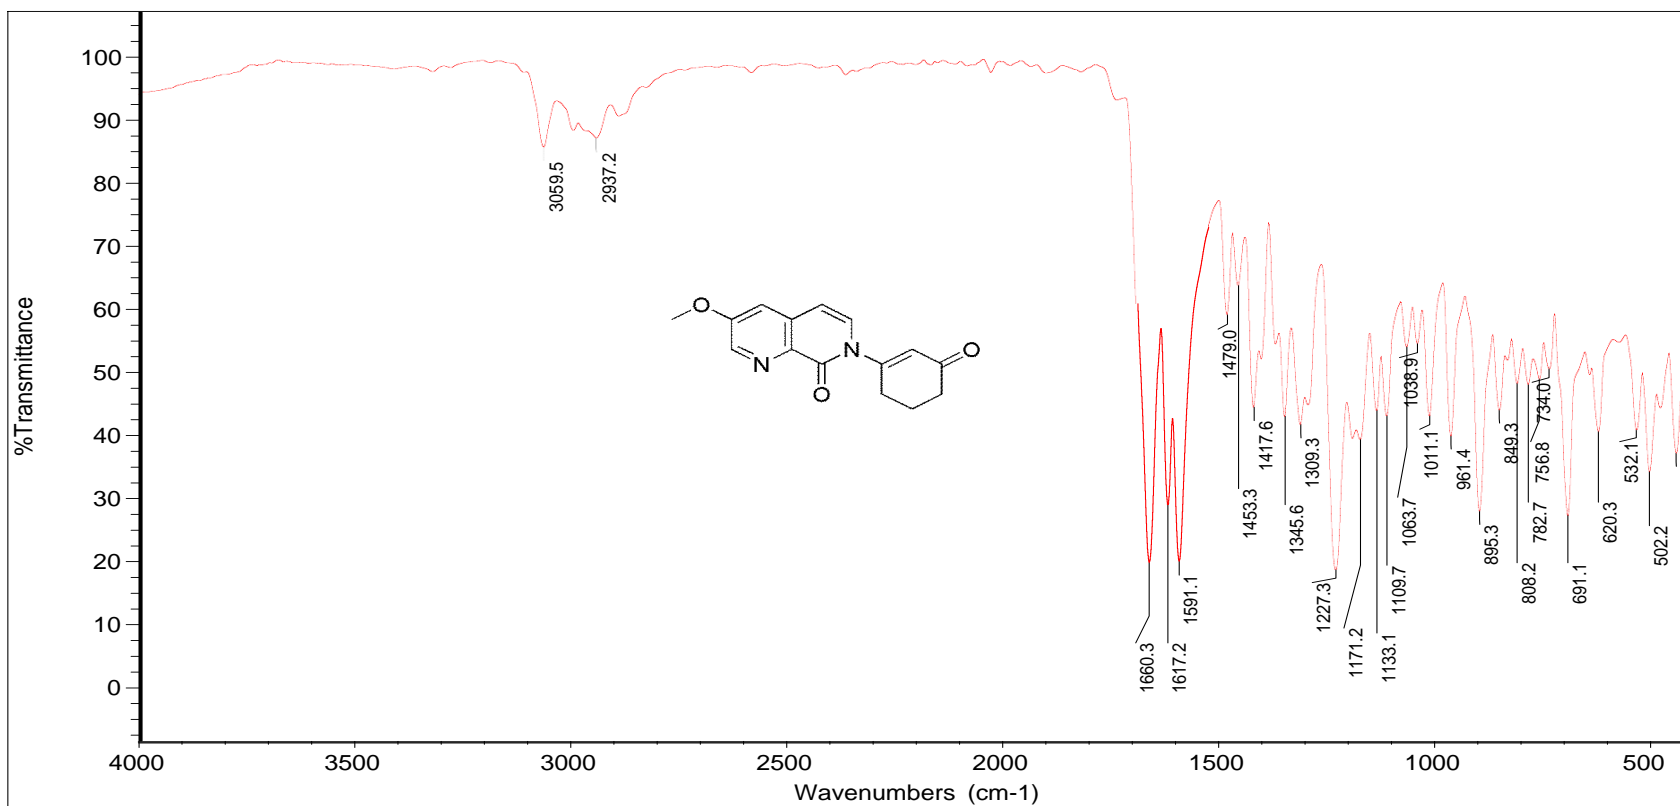

## New Journal of Chemistry

### 54. LCMS Spectra of 3-methoxy-7-(3-oxocyclohex-1-enyl)-1,7-naphthyridin-8(7H)-one, 5s

Injection vol : 2.0uL  
Acq Method : METHODS\AT\_S95FAD.M

Method info : A-0.1% HCOOH; B-ACN Flow: 1.5ml/min,  
Column-Atlantis dC18 (50X4.6mm-5µm, ) positive mode & Negative mode  
TIME (MIN) : 0--3.0 3.0--4.0 4.0--4.5 4.5--6.0  
%B 5-95 95 95-5 5

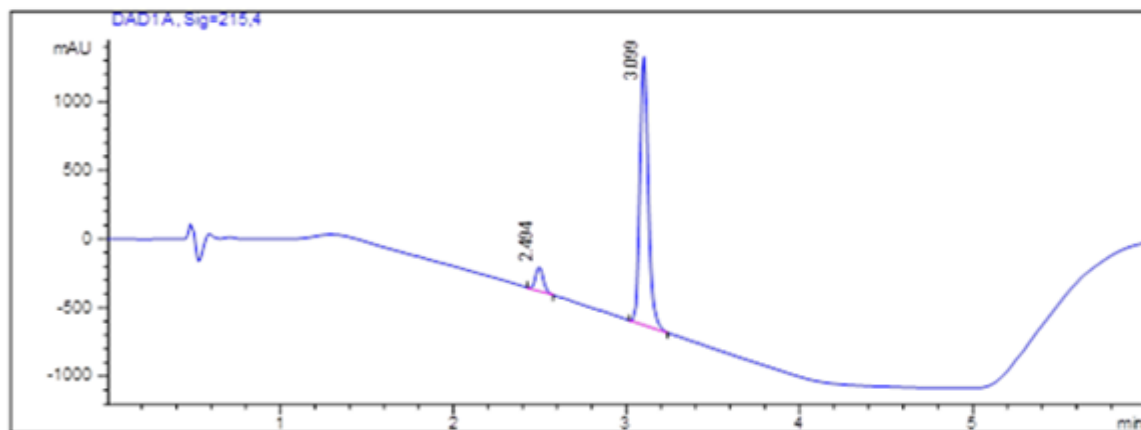

| Peak No | RT min | Area        | Area % |
|---------|--------|-------------|--------|
| 1       | 2.494  | 15.580e+002 | 7.817  |
| 2       | 3.099  | 16.581e+003 | 92.183 |

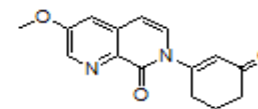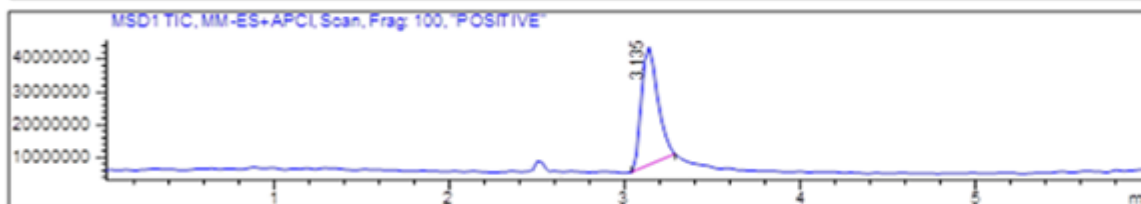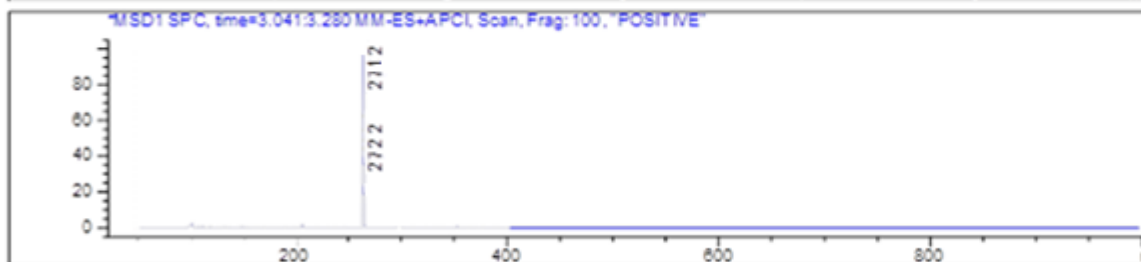

## New Journal of Chemistry

### 55. <sup>1</sup>H NMR Spectra of 1-(5,5-dimethyl-3-oxocyclohex-1-enyl)pyridin-2(1H)-one, 5t

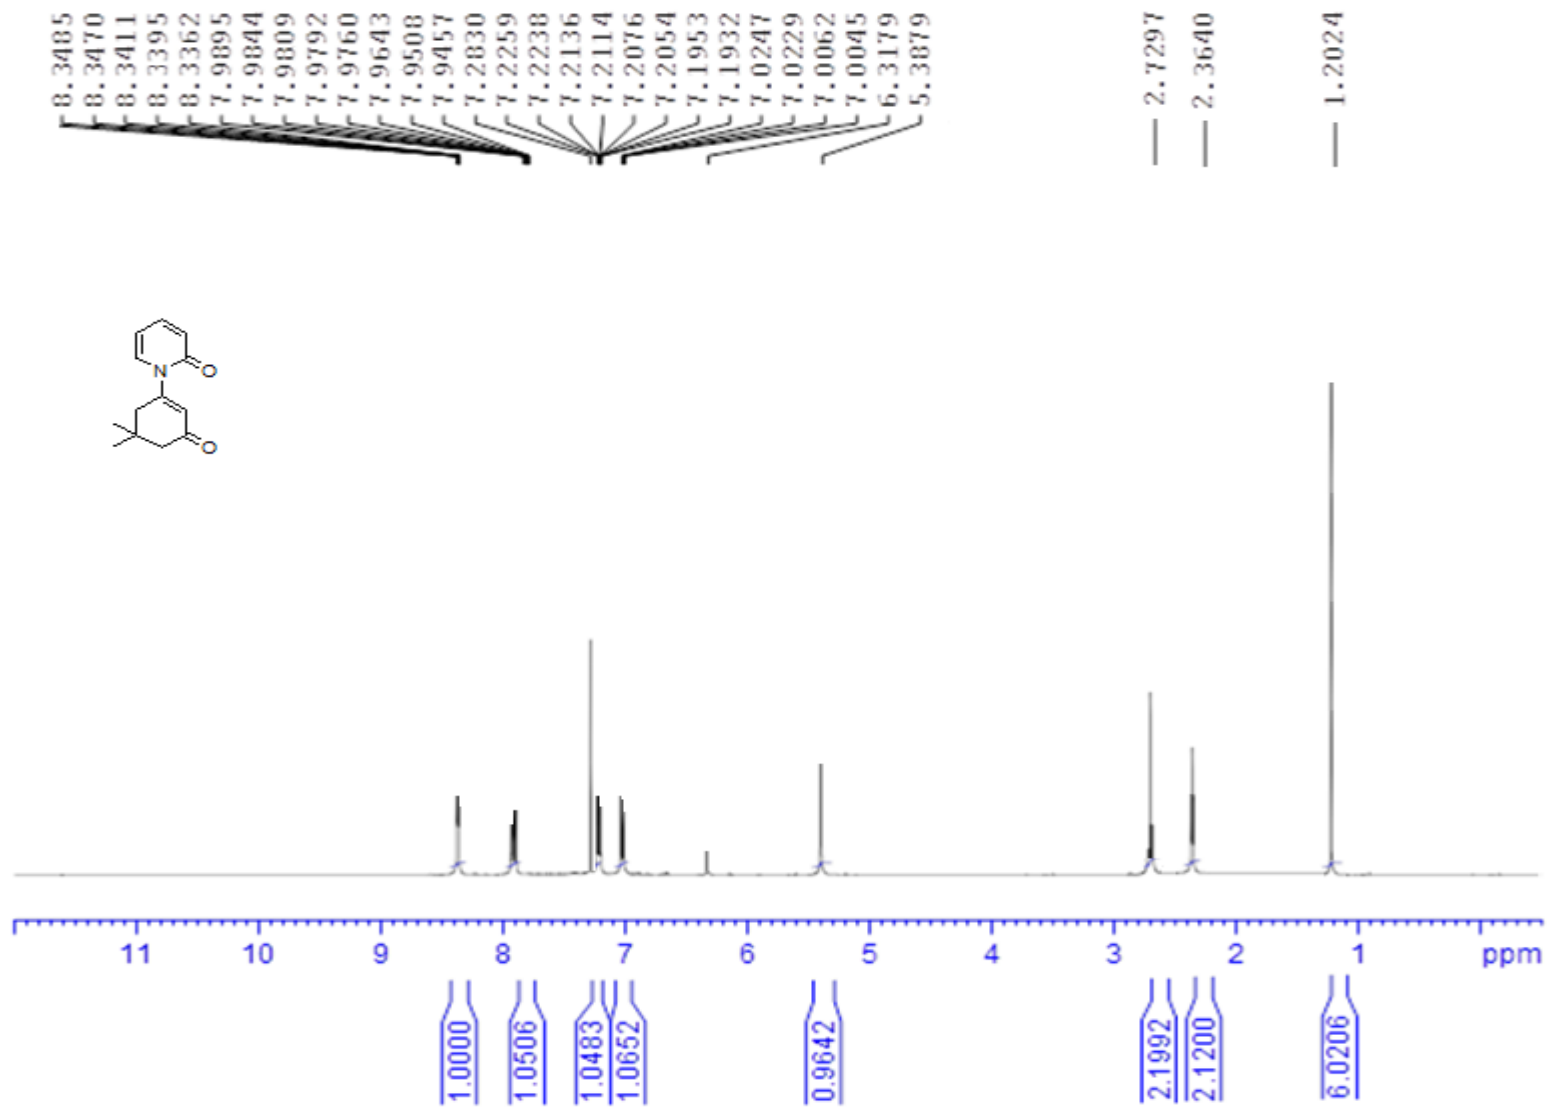

## New Journal of Chemistry

### 56. <sup>13</sup>C NMR Spectra of 1-(5,5-dimethyl-3-oxocyclohex-1-enyl)pyridin-2(1H)-one, 5t

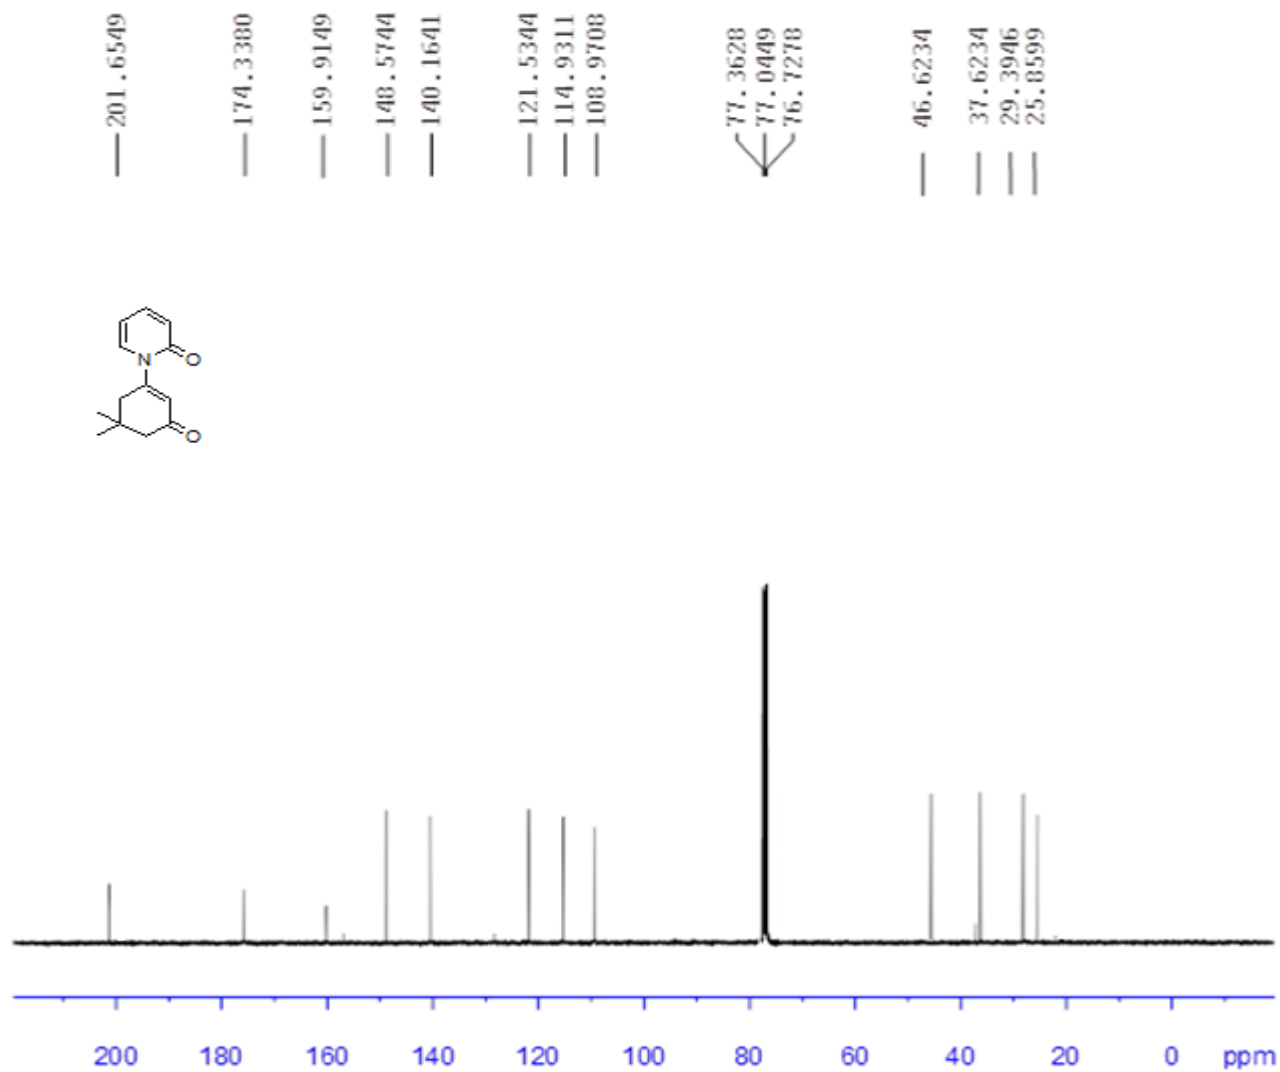

## New Journal of Chemistry

### 57. LCMS Spectra of 1-(5,5-dimethyl-3-oxocyclohex-1-enyl)pyridin-2(1H)-one, 5t

Injection vol : 2.0uL

Acq Method : METHODS\AI\_595FAD.M

Method info :A-0.1%HCOOH;B-ACN Flow: 1.5ml/min,  
Column-ATLANTIS dC18 (50X4.6mm-5µm, ) DUAL MODE  
TIME (MIN) : 0--3 3--4 4--4.5 4.5--6  
%B 5-95 95 95-5 5

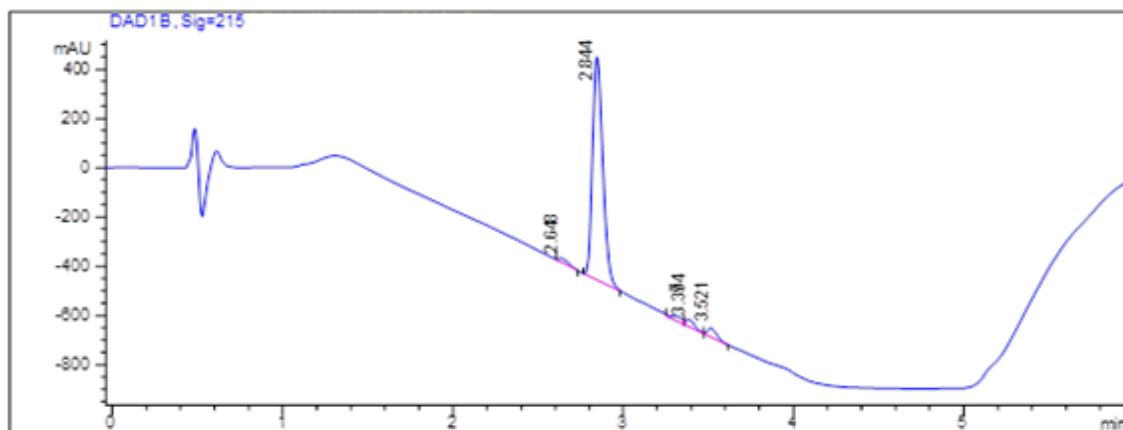

| Peak No | RT min | Area        | Area % |
|---------|--------|-------------|--------|
| 1       | 2.648  | 17.826e+001 | 1.856  |
| 2       | 2.844  | 13.785e+003 | 89.793 |
| 3       | 3.374  | 18.984e+001 | 2.131  |
| 4       | 3.394  | 1.064e+002  | 2.525  |
| 5       | 3.521  | 1.557e+002  | 3.695  |

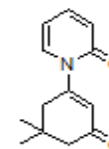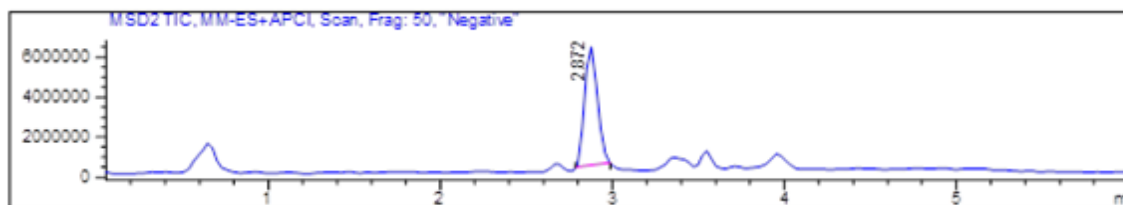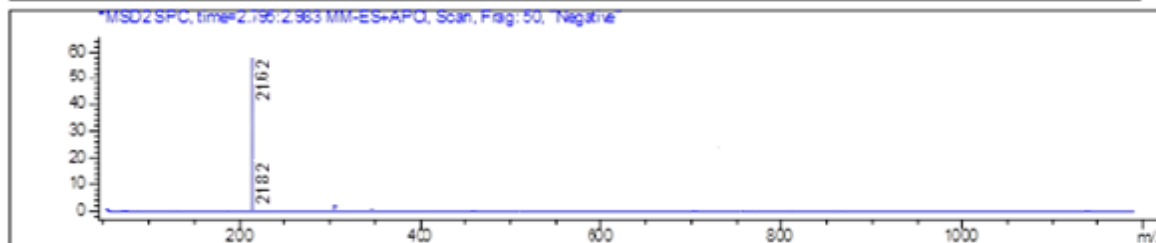

## New Journal of Chemistry

### 58. LCMS Spectra of 1-(3-oxo-5-phenylcyclohex-1-enyl)pyridin-2(1H)-one, 5u

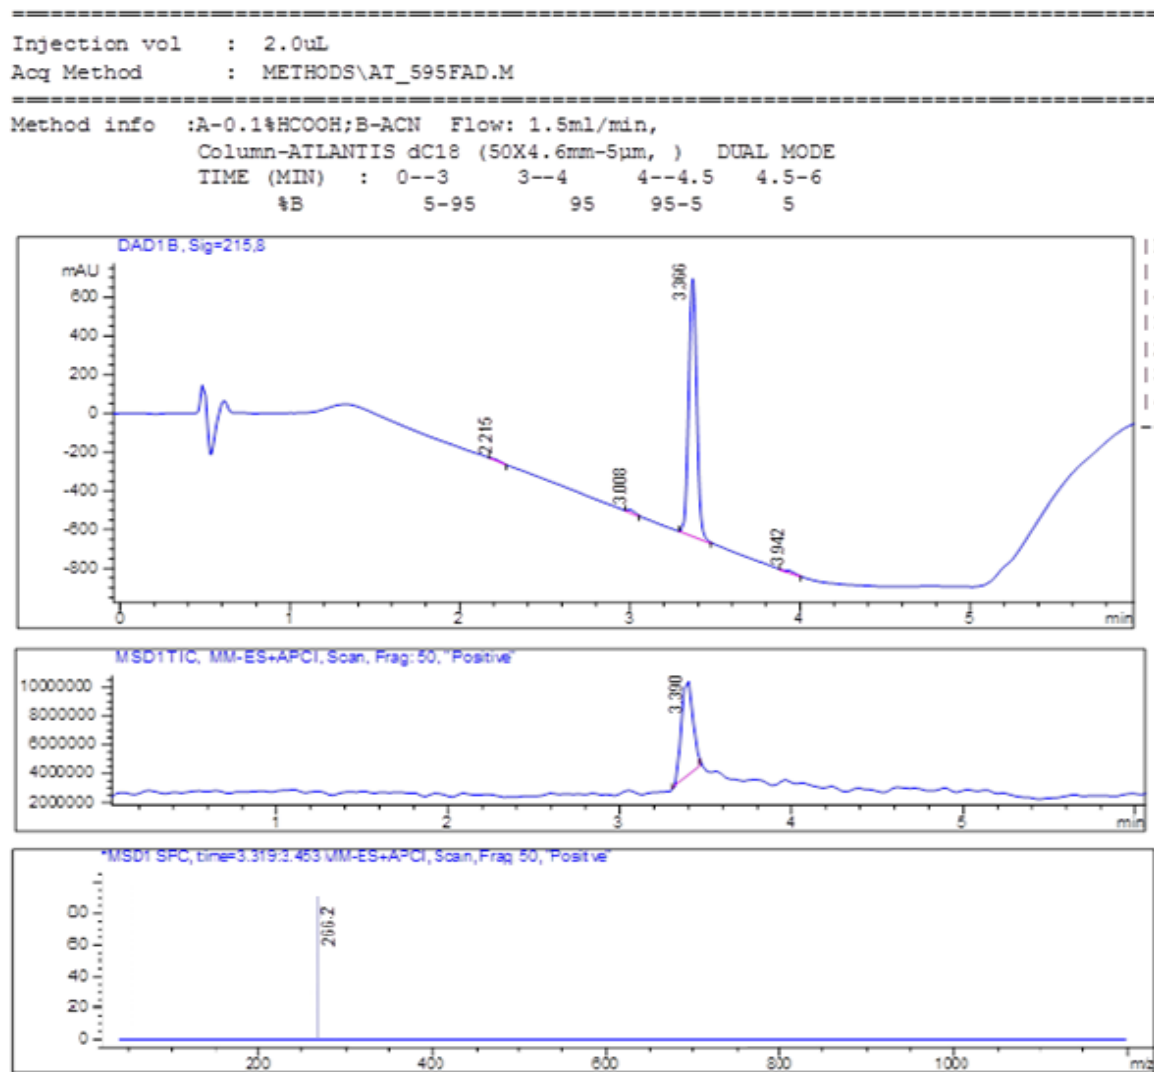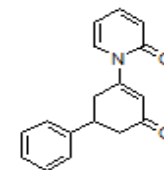

## New Journal of Chemistry

### 59. LCMS Spectra of 1-(5-(4-chlorophenyl)-3-oxocyclohex-1-enyl)pyridin-2(1H)-one, 5v

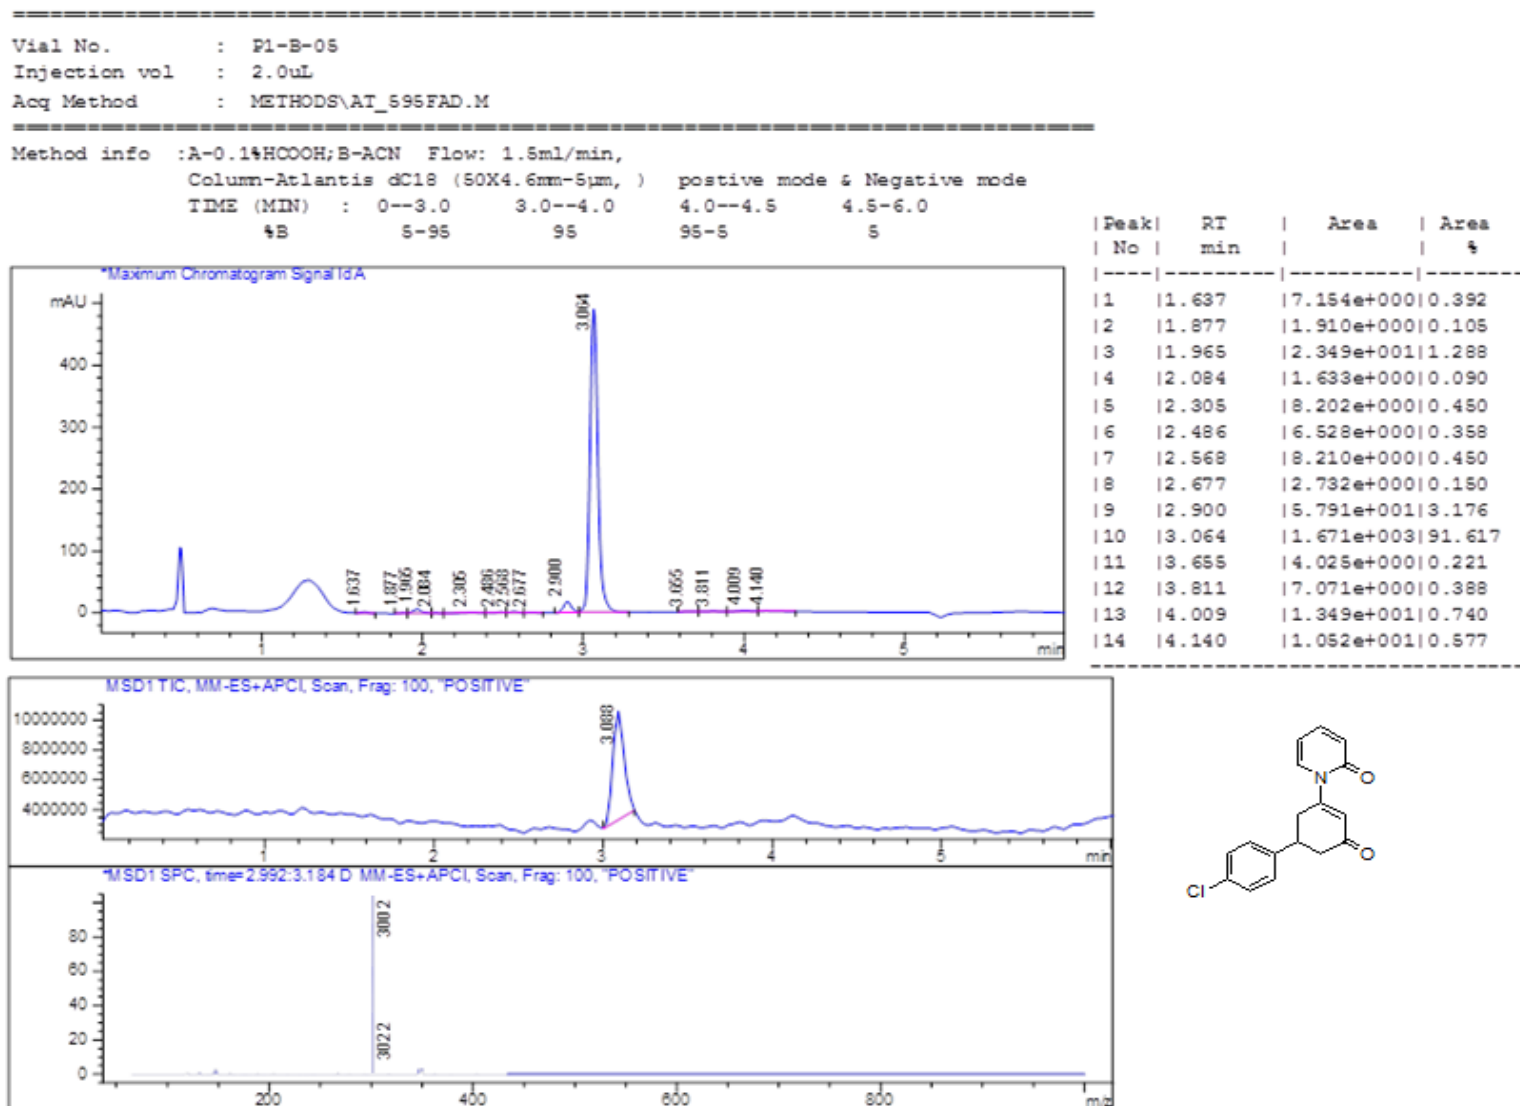

Supplement: c3nj01355c.pdf [file c3nj01355c.pdf]
